# Supplementary material
Source: PubMed Central journal article supplement (PMC10718084)
Supplement: ehp13174.s001.acco.pdf [file ehp13174.s001.acco.pdf]

**Note to readers with disabilities:** *EHP* strives to ensure that all journal content is accessible to all readers. However, some figures and Supplemental Material published in *EHP* articles may not conform to [508 standards](#) due to the complexity of the information being presented. If you need assistance accessing journal content, please contact [ehp508@niehs.nih.gov](mailto:ehp508@niehs.nih.gov). Our staff will work with you to assess and meet your accessibility needs within 3 working days.

### **Supplemental Material**

#### **Case-Cohort Study of the Association between PFAS and Selected Cancers among Participants in the American Cancer Society's Cancer Prevention Study II LifeLink Cohort**

Andrea Winquist, James M. Hodge, W. Ryan Diver, Juan L. Rodriguez, Alyssa N. Troeschel, Johnni Daniel, and Lauren R. Teras

#### **Table of Contents**

**Table S1.** Definitions used for cancer histologic subtypes using International Classification of Disease for Oncology (ICD-O) histology codes.

**Table S2.** Comparison of characteristics of study participants for the Overall CPS-II LifeLink cohort (n=39,371), the CPS-II LifeLink Cohort Meeting Case-cohort Study Inclusion Criteria (n=29,985), and participants selected for the sub-cohort (n=1000 selected, 999 with PFAS serum measurements), Case-cohort study of association between PFAS and selected cancers among participants in the Cancer Prevention II LifeLink cohort, 1998-2015.

**Table S3.** Characteristics of sub-cohort participants and participants with incident cancers, Case-cohort study of association between PFAS and selected cancers among participants in the Cancer Prevention II LifeLink cohort, 1998-2015.

**Table S4.** Results of Quality Control analysis using samples run with study samples, Case-cohort study of association between PFAS and selected cancers among participants in the Cancer Prevention II LifeLink cohort, 1998-2015.

**Table S5.** Percentage of samples with PFAS detections in the subcohort, Case-cohort study of association between PFAS and selected cancers among participants in the Cancer Prevention II LifeLink cohort, 1998-2015.

**Table S6.** Distribution of PFAS serum concentrations among subcohort participants (ng/ml, values below the limit of detection were imputed as the limit of detection divided by the square root of 2), Case-cohort study of association between PFAS and selected cancers among participants in the Cancer Prevention II LifeLink cohort, 1998-2015.

**Table S7.** Spearman correlation coefficients for correlations between PFAS serum concentrations among subcohort members, Case-cohort study of association between PFAS and selected cancers among participants in the Cancer Prevention II LifeLink cohort, 1998-2015.

**Table S8.** PFAS Distributions (ng/ml) in the subcohort by categories of covariates, using values with values below the limit of detection imputed as the limit of detection divided by the square root of 2, Case-cohort study of association between PFAS and selected cancers among participants in the Cancer Prevention II LifeLink cohort, 1998-2015.

**Table S9.** Results from primary models for overall cancer sites, Case-cohort study of association between PFAS and selected cancers among participants in the Cancer Prevention II LifeLink cohort, 1998-2015.

**Table S10.** Results from primary models for histologic subtypes, Case-cohort study of association between PFAS and selected cancers among participants in the Cancer Prevention II LifeLink cohort, 1998-2015.

**Table S11.** Ratio of the number of cases to the number of parameters in various models, Case-cohort study of association between PFAS and selected cancers among participants in the Cancer Prevention II LifeLink cohort, 1998-2015.

**Figure S1.** Timeline of study participant recruitment, Case-cohort study of association between PFAS and selected cancers among participants in the Cancer Prevention II LifeLink cohort, 1998-2015.

**Figure S2.** Hematologic sub-groups considered, Case-cohort study of association between PFAS and selected cancers among participants in the Cancer Prevention II LifeLink cohort, 1998-2015.

**Figure S3.** Box plots of PFAS serum concentrations among subcohort participants and participants with incident cancers (ng/ml), Case-cohort study of association between PFAS and selected cancers among participants in the Cancer Prevention II LifeLink cohort, 1998-2015.

**Figure S4.** Hazard ratios and 95% confidence intervals from primary models for overall cancer site groups per doubling of PFAS concentrations (using  $\log_2$ -transformed measures) [solid circles] and for quartiles defined among cases relative to quartile 1 [open circles], Case-cohort study of association between PFAS and selected cancers among participants in the Cancer Prevention II LifeLink cohort, 1998-2015.

**Figure S5.** Hazard ratios and 95% confidence intervals from primary models for histologic sub-groups for bladder and kidney cancer per doubling of PFAS concentrations (using  $\log_2$ -transformed measures) [solid circles] and for quartiles defined among cases relative to quartile 1 [open circles], Case-cohort study of association between PFAS and selected cancers among participants in the Cancer Prevention II LifeLink cohort, 1998-2015.

**Figure S6.** Hazard ratios and 95% confidence intervals from primary models for histologic subgroups for hematologic malignancies per doubling of PFAS concentrations (using log<sub>2</sub>-transformed measures) [solid circles] and for quartiles defined among cases relative to quartile 1 [open circles], Case-cohort study of association between PFAS and selected cancers among participants in the Cancer Prevention II LifeLink cohort, 1998-2015.

Table S1. Definitions used for cancer histologic subtypes using International Classification of Disease for Oncology (ICD-O) histology codes

| Cancer site and histologic subtypes                                                    | ICD-O codes                                                                                                                                                                                                      |
|----------------------------------------------------------------------------------------|------------------------------------------------------------------------------------------------------------------------------------------------------------------------------------------------------------------|
| Kidney-all                                                                             | All                                                                                                                                                                                                              |
| Renal cell carcinoma/adenocarcinoma (RCC)                                              | 8010, 8260, 8310, 8312, 8317, 8318, 8323                                                                                                                                                                         |
| Bladder -all                                                                           | All                                                                                                                                                                                                              |
| Transitional cell carcinoma of the bladder (TCC-B)                                     | 8120, 8122, 8130                                                                                                                                                                                                 |
| Transitional cell carcinoma of the bladder or kidney (TCC-BK)                          | 8120, 8122, 8130                                                                                                                                                                                                 |
| Breast (female only)                                                                   | All                                                                                                                                                                                                              |
| Prostate (male only)                                                                   | All                                                                                                                                                                                                              |
| Pancreas- all                                                                          | All                                                                                                                                                                                                              |
| Non-islet cell carcinoma/neuroendocrine tumors                                         | Excluding 8150, 8246                                                                                                                                                                                             |
| Hematopoietic (lymphoma, leukemia or myeloma)- (Heme)                                  | All                                                                                                                                                                                                              |
| Myeloid malignancies (MYELO)                                                           | 9840, 9860, 9861, 9863, 9867, 9871, 9872, 9873, 9874, 9875, 9876, 9891, 9895, 9920, 9945                                                                                                                         |
| Lymphoid malignancies (LYMPH)                                                          | 9590, 9591, 9596, 9650, 9652, 9663, 9670, 9671, 9673, 9675, 9680, 9684, 9687, 9689, 9690, 9691, 9695, 9698, 9699, 9700, 9701, 9702, 9705, 9709, 9714, 9718, 9728, 9729, 9732, 9823, 9827, 9831, 9834, 9835, 9940 |
| Non-Hodgkin Leukemia/Lymphoma (NHL) <sup>b</sup>                                       | 9591, 9670, 9671, 9673, 9675, 9680, 9684, 9687, 9689, 9690, 9691, 9695, 9698, 9699, 9700, 9701, 9702, 9705, 9709, 9714, 9718, 9728, 9729, 9732, 9823, 9827, 9831, 9834, 9835, 9940                               |
| NHL without Multiple Myeloma (NHL without MM)                                          | 9591, 9670, 9671, 9673, 9675, 9680, 9684, 9687, 9689, 9690, 9691, 9695, 9698, 9699, 9700, 9701, 9702, 9705, 9709, 9714, 9718, 9728, 9729, 9823, 9827, 9831, 9834, 9835, 9940                                     |
| B-cell NHL (B-NHL)                                                                     | 9670, 9671, 9673, 9680, 9687, 9689, 9690, 9691, 9695, 9698, 9699, 9728, 9732, 9823, 9940                                                                                                                         |
| B-cell NHL without Multiple Myeloma (B-NHL without MM)                                 | 9670, 9671, 9673, 9680, 9687, 9689, 9690, 9691, 9695, 9698, 9699, 9728, 9823, 9940                                                                                                                               |
| Diffuse Large B-cell Lymphoma (DLBCL)                                                  | 9680                                                                                                                                                                                                             |
| Chronic lymphocytic leukemia/Small lymphocytic lymphoma/Mantle cell lymphoma (CLL/SLL) | 9670, 9673, 9823                                                                                                                                                                                                 |
| Multiple Myeloma (MM)                                                                  | 9732                                                                                                                                                                                                             |

Table S2. Comparison of characteristics of study participants for the Overall CPS-II<sup>a</sup> LifeLink cohort (n=39,371), the CPS-II LifeLink Cohort Meeting Case-cohort Study Inclusion Criteria<sup>b</sup> (n=29,985), and participants selected for the sub-cohort<sup>c</sup> (n=1000 selected, 999 with PFAS<sup>a</sup> serum measurements<sup>d</sup>), Case-cohort study of association between PFAS and selected cancers among participants in the Cancer Prevention II LifeLink cohort, 1998-2015

|                                        | CPS-II <sup>a</sup><br>LifeLink | CPS-II <sup>a</sup> LifeLink<br>Cohort Meeting<br>Study Inclusion<br>Criteria <sup>b</sup> | Participants<br>selected for<br>the sub-<br>cohort <sup>c</sup> | Participants in<br>the sub-cohort<br>with PFAS<br>measurements <sup>d</sup> |
|----------------------------------------|---------------------------------|--------------------------------------------------------------------------------------------|-----------------------------------------------------------------|-----------------------------------------------------------------------------|
| Overall number                         | 39,371                          | 29,985                                                                                     | 1000                                                            | 999                                                                         |
| % women                                | 56%                             | 56%                                                                                        | 50%                                                             | 49.95%                                                                      |
| % Non-Hispanic white race              | 98%                             | 98%                                                                                        | 98.2%                                                           | 98.2%                                                                       |
| % college graduate                     | 46%                             | 46%                                                                                        | 44.8%                                                           | 44.8%                                                                       |
| % current cigarette smokers in 1997    | 4%                              | 4%                                                                                         | 3.9%                                                            | 3.9%                                                                        |
| Age range at blood collection (years)  | 47-94                           | 49-94                                                                                      | 54-86                                                           | 54-86                                                                       |
| Median age at blood collection (years) | 70                              | 69                                                                                         | 69                                                              | 69                                                                          |
| Women-n                                | 21,963                          | 16,727                                                                                     | 500                                                             | 499                                                                         |
| % Non-Hispanic white race              | 98%                             | 98%                                                                                        | 99.0%                                                           | 99.0%                                                                       |
| % college graduate                     | 38%                             | 37%                                                                                        | 37%                                                             | 37.07%                                                                      |
| % current cigarette smokers in 1997    | 4%                              | 4%                                                                                         | 4.2%                                                            | 4.2%                                                                        |
| Age range at blood collection (years)  | 47-88                           | 49-88                                                                                      | 54-82                                                           | 54-82                                                                       |
| Median age at blood collection (years) | 69                              | 68                                                                                         | 68                                                              | 68                                                                          |
| Men-n                                  | 17,408                          | 13,258                                                                                     | 500                                                             | 500                                                                         |
| % Non-Hispanic white race              | 98%                             | 98%                                                                                        | 97.4%                                                           | 97.4%                                                                       |
| % college graduate                     | 57%                             | 57%                                                                                        | 52.6%                                                           | 52.6%                                                                       |
| % current cigarette smokers in 1997    | 4%                              | 4%                                                                                         | 3.6%                                                            | 3.6%                                                                        |
| Age range at blood collection (years)  | 51-94                           | 51-94                                                                                      | 57-86                                                           | 57-86                                                                       |
| Median age at blood collection (years) | 71                              | 70                                                                                         | 70                                                              | 70                                                                          |

<sup>a</sup> CPS-II=Cancer Prevention Study II, PFAS=per- and polyfluoroalkyl substances

<sup>b</sup> Study inclusion criteria for the sub-cohort included the following:

- 1) no previous cancer diagnosis (other than non-melanoma skin cancer) at the time of blood sample collection (1998-2001)
- 2) at least 500 µl of stored serum available for the study
- 3) For women, post-menopausal as of the time of the 1997 survey

<sup>c</sup> The sub-cohort was a random sample stratified by sex (500 men and 500 women). The sub-cohort sample size was based on consideration of study power (including for sex-specific analyses) and cost.

<sup>d</sup> After the sub-cohort was selected, it was determined that the available serum was insufficient for 1 person (female) selected for the sub-cohort.

Table S3. Characteristics of sub-cohort participants and participants with incident cancers, Case-cohort study of association between PFAS and selected cancers among participants in the Cancer Prevention II LifeLink cohort, 1998-2015

|                                            | Subcohort<br>n (%) | Bladder<br>cancer cases<br>n (%) | Breast cancer<br>cases<br>n (%) <sup>a</sup> | Kidney cancer<br>cases<br>n (%) | Pancreatic<br>cancer cases<br>n (%) | Prostate<br>cancer cases<br>n (%) <sup>a</sup> | Hematologic<br>malignancy cases<br>n (%) |
|--------------------------------------------|--------------------|----------------------------------|----------------------------------------------|---------------------------------|-------------------------------------|------------------------------------------------|------------------------------------------|
| <b>Sexes combined</b>                      |                    |                                  |                                              |                                 |                                     |                                                |                                          |
| Year of serum collection                   |                    |                                  |                                              |                                 |                                     |                                                |                                          |
| 1998                                       | 80 (8.0)           | 30 (7.5)                         |                                              | 10 (6.3)                        | 9 (5.2)                             |                                                | 49 (7.7)                                 |
| 1999                                       | 308 (30.8)         | 115 (28.7)                       |                                              | 51 (32.3)                       | 52 (30.2)                           |                                                | 173 (27.2)                               |
| 2000                                       | 558 (55.9)         | 233 (58.1)                       |                                              | 90 (57.0)                       | 98 (57.0)                           |                                                | 386 (60.8)                               |
| 2001                                       | 53 (5.3)           | 23 (5.7)                         |                                              | 7 (4.4)                         | 13 (7.6)                            |                                                | 27 (4.3)                                 |
| Age at serum collection (years)            |                    |                                  |                                              |                                 |                                     |                                                |                                          |
| <60                                        | 33 (3.3)           | 7 (1.7)                          |                                              | 6 (3.8)                         | 6 (3.5)                             |                                                | 15 (2.4)                                 |
| 60-64                                      | 174 (17.4)         | 40 (10.0)                        |                                              | 26 (16.5)                       | 27 (15.7)                           |                                                | 101 (15.9)                               |
| 65-69                                      | 321 (32.1)         | 116 (28.9)                       |                                              | 45 (28.5)                       | 60 (34.9)                           |                                                | 189 (29.8)                               |
| 70-74                                      | 303 (30.3)         | 132 (32.9)                       |                                              | 44 (27.8)                       | 54 (31.4)                           |                                                | 205 (32.3)                               |
| 75-79                                      | 134 (13.4)         | 95 (23.7)                        |                                              | 32 (20.3)                       | 20 (11.6)                           |                                                | 107 (16.9)                               |
| ≥80                                        | 34 (3.4)           | 11 (2.7)                         |                                              | 5 (3.2)                         | 5 (2.9)                             |                                                | 18 (2.8)                                 |
| Sex                                        |                    |                                  |                                              |                                 |                                     |                                                |                                          |
| Male                                       | 500 (50.1)         | 319 (79.6)                       |                                              | 92 (58.2)                       | 91 (52.9)                           |                                                | 351 (55.3)                               |
| Female                                     | 499 (49.9)         | 82 (20.4)                        |                                              | 66 (41.8)                       | 81 (47.1)                           |                                                | 284 (44.7)                               |
| Highest level of education                 |                    |                                  |                                              |                                 |                                     |                                                |                                          |
| Missing                                    | 5 (0.5)            | 5 (1.2)                          |                                              | 1 (0.6)                         |                                     |                                                | 7 (1.1)                                  |
| High school or less                        | 244 (24.4)         | 93 (23.2)                        |                                              | 27 (17.1)                       | 36 (20.9)                           |                                                | 138 (21.7)                               |
| Some college or vocational/trade school    | 302 (30.2)         | 105 (26.2)                       |                                              | 44 (27.8)                       | 45 (26.2)                           |                                                | 171 (26.9)                               |
| College graduate                           | 252 (25.2)         | 101 (25.2)                       |                                              | 47 (29.7)                       | 57 (33.1)                           |                                                | 160 (25.2)                               |
| Graduate school                            | 196 (19.6)         | 97 (24.2)                        |                                              | 39 (24.7)                       | 34 (19.8)                           |                                                | 159 (25.0)                               |
| Race/ ethnicity                            |                    |                                  |                                              |                                 |                                     |                                                |                                          |
| Missing                                    | 4 (0.4)            |                                  |                                              |                                 | 1 (0.6)                             |                                                | 2 (0.3)                                  |
| Hispanic or non-White race/ethnicity       | 14 (1.4)           | 4 (1.0)                          |                                              | 3 (1.9)                         | 4 (2.3)                             |                                                | 7 (1.1)                                  |
| Non-Hispanic White race/ethnicity          | 981 (98.2)         | 397 (99.0)                       |                                              | 155 (98.1)                      | 167 (97.1)                          |                                                | 626 (98.6)                               |
| Smoking status in 1997                     |                    |                                  |                                              |                                 |                                     |                                                |                                          |
| Missing                                    |                    |                                  |                                              | 1 (0.6)                         |                                     |                                                |                                          |
| Nonsmoker                                  | 457 (45.7)         | 97 (24.2)                        |                                              | 60 (38.0)                       | 87 (50.6)                           |                                                | 263 (41.4)                               |
| Current smoker                             | 39 (3.9)           | 30 (7.5)                         |                                              | 8 (5.1)                         | 4 (2.3)                             |                                                | 15 (2.4)                                 |
| Former smoker                              | 488 (48.8)         | 268 (66.8)                       |                                              | 87 (55.1)                       | 80 (46.5)                           |                                                | 347 (54.6)                               |
| Ever smoker (unknown if current or former) | 15 (1.5)           | 6 (1.5)                          |                                              | 2 (1.3)                         | 1 (0.6)                             |                                                | 10 (1.6)                                 |
| Alcohol consumption in 1997                |                    |                                  |                                              |                                 |                                     |                                                |                                          |
| Missing                                    | 2 (0.2)            | 1 (0.2)                          |                                              |                                 |                                     |                                                |                                          |
| Non-drinker                                | 378 (37.8)         | 115 (28.7)                       |                                              | 64 (40.5)                       | 67 (39.0)                           |                                                | 248 (39.1)                               |

|                                                                                 | Subcohort<br>n (%) | Bladder<br>cancer cases<br>n (%) | Breast cancer<br>cases<br>n (%) <sup>a</sup> | Kidney cancer<br>cases<br>n (%) | Pancreatic<br>cancer cases<br>n (%) | Prostate<br>cancer cases<br>n (%) <sup>a</sup> | Hematologic<br>malignancy cases<br>n (%) |
|---------------------------------------------------------------------------------|--------------------|----------------------------------|----------------------------------------------|---------------------------------|-------------------------------------|------------------------------------------------|------------------------------------------|
| <1 drink per week                                                               | 135 (13.5)         | 66 (16.5)                        |                                              | 27 (17.1)                       | 22 (12.8)                           |                                                | 90 (14.2)                                |
| 1-6 drinks per week                                                             | 326 (32.6)         | 142 (35.4)                       |                                              | 47 (29.7)                       | 54 (31.4)                           |                                                | 175 (27.6)                               |
| 1 drink per day                                                                 | 110 (11.0)         | 53 (13.2)                        |                                              | 11 (7.0)                        | 20 (11.6)                           |                                                | 94 (14.8)                                |
| ≥2 drinks per day                                                               | 48 (4.8)           | 24 (6.0)                         |                                              | 9 (5.7)                         | 9 (5.2)                             |                                                | 28 (4.4)                                 |
| Body mass index (kg/m <sup>2</sup> )                                            |                    |                                  |                                              |                                 |                                     |                                                |                                          |
| Missing                                                                         | 10 (1.0)           | 4(1.0)                           |                                              | 1 (0.6)                         |                                     |                                                | 2 (0.3)                                  |
| <18.5                                                                           | 14 (1.4)           | 1 (0.2)                          |                                              | 1 (0.6)                         | 2 (1.2)                             |                                                | 8 (1.3)                                  |
| 18.5-<25                                                                        | 426 (42.6)         | 150 (37.4)                       |                                              | 55 (34.8)                       | 55 (32.0)                           |                                                | 261 (41.1)                               |
| 25-<30                                                                          | 405 (40.5)         | 200 (49.9)                       |                                              | 72 (45.6)                       | 80 (46.5)                           |                                                | 250 (39.4)                               |
| ≥30                                                                             | 144 (14.4)         | 46 (11.5)                        |                                              | 29 (18.4)                       | 35 (20.3)                           |                                                | 114 (18.0)                               |
| Physical activity                                                               |                    |                                  |                                              |                                 |                                     |                                                |                                          |
| Missing                                                                         | 1 (0.1)            |                                  |                                              |                                 | 1 (0.6)                             |                                                |                                          |
| ≥10 hours/week moderate to vigorous<br>physical activity (metabolic equivalent) | 522 (52.3)         | 213 (53.1)                       |                                              | 85 (53.8)                       | 84 (48.8)                           |                                                | 333 (52.4)                               |
| <10 hours/week moderate to vigorous<br>physical activity (metabolic equivalent) | 476 (47.6)         | 188 (46.9)                       |                                              | 73 (46.2)                       | 87 (50.6)                           |                                                | 302 (47.6)                               |
| <b>Females</b>                                                                  |                    |                                  |                                              |                                 |                                     |                                                |                                          |
| Year of serum collection                                                        |                    |                                  |                                              |                                 |                                     |                                                |                                          |
| 1998                                                                            | 37 (7.4)           | 6 (7.3)                          | 58 (7.4)                                     | 4 (6.1)                         | 2 (2.5)                             |                                                | 25 (8.8)                                 |
| 1999                                                                            | 156 (31.3)         | 20 (24.4)                        | 223 (28.4)                                   | 19 (28.8)                       | 28 (34.6)                           |                                                | 77 (27.1)                                |
| 2000                                                                            | 278 (55.7)         | 52 (63.4)                        | 470 (59.8)                                   | 40 (60.6)                       | 48 (59.3)                           |                                                | 168 (59.2)                               |
| 2001                                                                            | 28 (5.6)           | 4 (4.9)                          | 35 (4.5)                                     | 3 (4.5)                         | 3 (3.7)                             |                                                | 14 (4.9)                                 |
| Age at serum collection (years)                                                 |                    |                                  |                                              |                                 |                                     |                                                |                                          |
| <60                                                                             | 28 (5.6)           |                                  | 46 (5.9)                                     | 5 (7.6)                         | 5 (6.2)                             |                                                | 12 (4.2)                                 |
| 60-64                                                                           | 96 (19.2)          | 12 (14.6)                        | 203 (25.8)                                   | 13 (19.7)                       | 18 (22.2)                           |                                                | 62 (21.8)                                |
| 65-69                                                                           | 165 (33.1)         | 21 (25.6)                        | 262 (33.3)                                   | 18 (27.3)                       | 21 (25.9)                           |                                                | 89 (31.3)                                |
| 70-74                                                                           | 145 (29.1)         | 32 (39.0)                        | 185 (23.5)                                   | 14 (21.2)                       | 25 (30.9)                           |                                                | 75 (26.4)                                |
| 75-79                                                                           | 51 (10.2)          | 17 (20.7)                        | 78 (9.9)                                     | 15 (22.7)                       | 10 (12.3)                           |                                                | 38 (13.4)                                |
| ≥80                                                                             | 14 (2.8)           |                                  | 12 (1.5)                                     | 1 (1.5)                         | 2 (2.5)                             |                                                | 8 (2.8)                                  |
| Highest level of education                                                      |                    |                                  |                                              |                                 |                                     |                                                |                                          |
| Missing                                                                         | 1 (0.2)            |                                  | 4 (0.5)                                      | 1 (1.5)                         |                                     |                                                | 3 (1.1)                                  |
| Highschool or less                                                              | 143 (28.7)         | 30 (36.6)                        | 204 (26.0)                                   | 10 (15.2)                       | 24 (29.6)                           |                                                | 65 (22.9)                                |
| Vocational/trade school or some college                                         | 170 (34.1)         | 27 (32.9)                        | 251 (31.9)                                   | 21 (31.8)                       | 21 (25.9)                           |                                                | 98 (34.5)                                |
| College graduate                                                                | 128 (25.7)         | 17 (20.7)                        | 186 (23.7)                                   | 20 (30.3)                       | 27 (33.3)                           |                                                | 64 (22.5)                                |
| Graduate school                                                                 | 57 (11.4)          | 8 (9.8)                          | 141 (17.9)                                   | 14 (21.2)                       | 9 (11.1)                            |                                                | 54 (19.0)                                |
| Race/ ethnicity                                                                 |                    |                                  |                                              |                                 |                                     |                                                |                                          |
| Missing                                                                         |                    |                                  | 1 (0.1)                                      |                                 |                                     |                                                |                                          |

|                                                                                 | Subcohort<br>n (%) | Bladder<br>cancer cases<br>n (%) | Breast cancer<br>cases<br>n (%) <sup>a</sup> | Kidney cancer<br>cases<br>n (%) | Pancreatic<br>cancer cases<br>n (%) | Prostate<br>cancer cases<br>n (%) <sup>a</sup> | Hematologic<br>malignancy cases<br>n (%) |
|---------------------------------------------------------------------------------|--------------------|----------------------------------|----------------------------------------------|---------------------------------|-------------------------------------|------------------------------------------------|------------------------------------------|
| Hispanic or non-White race                                                      | 5 (1.0)            |                                  | 21 (2.7)                                     | 2 (3.0)                         |                                     |                                                | 3 (1.1)                                  |
| Non-Hispanic White                                                              | 494 (99.0)         | 82 (100)                         | 764 (97.2)                                   | 64 (97.0)                       | 81 (100)                            |                                                | 281 (98.9)                               |
| Smoking status in 1997                                                          |                    |                                  |                                              |                                 |                                     |                                                |                                          |
| Missing                                                                         |                    |                                  | 1 (0.1)                                      |                                 |                                     |                                                |                                          |
| Nonsmoker                                                                       | 275 (55.1)         | 30 (36.6)                        | 409 (52.0)                                   | 37 (56.1)                       | 48 (59.3)                           |                                                | 141 (49.6)                               |
| Current smoker                                                                  | 21 (4.2)           | 9 (11.0)                         | 26 (3.3)                                     | 2 (3.0)                         | 2 (2.5)                             |                                                | 7 (2.5)                                  |
| Former smoker                                                                   | 200 (40.1)         | 42 (51.2)                        | 345 (43.9)                                   | 26 (39.4)                       | 31 (38.3)                           |                                                | 131 (46.1)                               |
| Ever smoker (unknown if current or former)                                      | 3 (0.6)            | 1 (1.2)                          | 5 (0.6)                                      | 1 (1.5)                         |                                     |                                                | 5 (1.8)                                  |
| Alcohol consumption in 1997                                                     |                    |                                  |                                              |                                 |                                     |                                                |                                          |
| Missing                                                                         | 1 (0.2)            |                                  |                                              |                                 |                                     |                                                |                                          |
| Non-drinker                                                                     | 218 (43.7)         | 32 (39.0)                        | 323 (41.1)                                   | 29 (43.9)                       | 41 (50.6)                           |                                                | 121 (42.6)                               |
| <1 drink per week                                                               | 79 (15.8)          | 15 (18.3)                        | 119 (15.1)                                   | 15 (22.7)                       | 6 (7.4)                             |                                                | 50 (17.6)                                |
| 1-6 drinks per week                                                             | 149 (29.9)         | 23 (28.0)                        | 238 (30.3)                                   | 18 (27.3)                       | 20 (24.7)                           |                                                | 76 (26.8)                                |
| 1 drink per day                                                                 | 37 (7.4)           | 10 (12.2)                        | 83 (10.6)                                    | 3 (4.5)                         | 12 (14.8)                           |                                                | 32 (11.3)                                |
| ≥2 drinks per day                                                               | 15 (3.0)           | 2 (2.4)                          | 23 (2.9)                                     | 1 (1.5)                         | 2 (2.5)                             |                                                | 5 (1.8)                                  |
| Body mass index (kg/m <sup>2</sup> )                                            |                    |                                  |                                              |                                 |                                     |                                                |                                          |
| Missing                                                                         | 2 (0.4)            |                                  | 1 (0.1)                                      | 1 (1.5)                         |                                     |                                                | 1 (0.4)                                  |
| <18.5                                                                           | 12 (2.4)           | 1 (1.2)                          | 15 (1.9)                                     |                                 | 2 (2.5)                             |                                                | 4 (1.4)                                  |
| 18.5-<25                                                                        | 245 (49.1)         | 47 (57.3)                        | 392 (49.9)                                   | 34 (51.5)                       | 23 (28.4)                           |                                                | 139 (48.9)                               |
| 25-<30                                                                          | 168 (33.7)         | 27 (32.9)                        | 252 (32.1)                                   | 18 (27.3)                       | 38 (46.9)                           |                                                | 83 (29.2)                                |
| ≥30                                                                             | 72 (14.4)          | 7 (8.5)                          | 126 (16.0)                                   | 13 (19.7)                       | 18 (22.2)                           |                                                | 57 (20.1)                                |
| Physical activity                                                               |                    |                                  |                                              |                                 |                                     |                                                |                                          |
| ≥10 hours/week moderate to vigorous<br>physical activity (metabolic equivalent) | 255 (51.1)         | 41 (50.0)                        | 398 (50.6)                                   | 38 (57.6)                       | 36 (44.4)                           |                                                | 138 (48.6)                               |
| <10 hours/week moderate to vigorous<br>physical activity (metabolic equivalent) | 244 (48.9)         | 41 (50.0)                        | 388 (49.4)                                   | 28 (42.4)                       | 45 (55.6)                           |                                                | 146 (51.4)                               |
| Post-menopausal hormone use                                                     |                    |                                  |                                              |                                 |                                     |                                                |                                          |
| Never used post-menopausal hormones                                             | 141 (28.3)         | 30 (36.6)                        | 149 (19.0)                                   | 15 (22.7)                       | 27 (33.3)                           |                                                | 76 (26.8)                                |
| Ever used post-menopausal hormones                                              | 358 (71.7)         | 52 (63.4)                        | 637 (81.0)                                   | 51 (77.3)                       | 54 (66.7)                           |                                                | 208 (73.2)                               |
| Age at menarche (years)                                                         |                    |                                  |                                              |                                 |                                     |                                                |                                          |
| Missing                                                                         | 6 (1.2)            | 5 (6.1)                          | 12 (1.5)                                     | 1 (1.5)                         | 2 (2.5)                             |                                                | 7 (2.5)                                  |
| <12                                                                             | 103 (20.6)         | 19 (23.2)                        | 142 (18.1)                                   | 6 (9.1)                         | 16 (19.8)                           |                                                | 49 (17.3)                                |
| 12                                                                              | 120 (24.0)         | 18 (22.0)                        | 184 (23.4)                                   | 19 (28.8)                       | 22 (27.2)                           |                                                | 61 (21.5)                                |
| 13                                                                              | 164 (32.9)         | 18 (22.0)                        | 254 (32.3)                                   | 25 (37.9)                       | 24 (29.6)                           |                                                | 93 (32.7)                                |
| ≥14                                                                             | 106 (21.2)         | 22 (26.8)                        | 194 (24.7)                                   | 15 (22.7)                       | 17 (21.0)                           |                                                | 74 (26.1)                                |
| Age at menopause (years)                                                        |                    |                                  |                                              |                                 |                                     |                                                |                                          |
| <45                                                                             | 103 (20.6)         | 18 (22.0)                        | 166 (21.1)                                   | 13 (19.7)                       | 17 (21.0)                           |                                                | 54 (19.0)                                |



|                                         | Subcohort<br>n (%) | Bladder<br>cancer cases<br>n (%) | Breast cancer<br>cases<br>n (%) <sup>a</sup> | Kidney cancer<br>cases<br>n (%) | Pancreatic<br>cancer cases<br>n (%) | Prostate<br>cancer cases<br>n (%) <sup>a</sup> | Hematologic<br>malignancy cases<br>n (%) |
|-----------------------------------------|--------------------|----------------------------------|----------------------------------------------|---------------------------------|-------------------------------------|------------------------------------------------|------------------------------------------|
| 45-<50                                  | 123 (24.6)         | 20 (24.4)                        | 156 (19.8)                                   | 22 (33.3)                       | 26 (32.1)                           |                                                | 82 (28.9)                                |
| 50-<53                                  | 153 (30.7)         | 23 (28.0)                        | 248 (31.6)                                   | 14 (21.2)                       | 20 (24.7)                           |                                                | 84 (29.6)                                |
| ≥53                                     | 120 (24.0)         | 21 (25.6)                        | 216 (27.5)                                   | 17 (25.8)                       | 18 (22.2)                           |                                                | 64 (22.5)                                |
| Number of live births                   |                    |                                  |                                              |                                 |                                     |                                                |                                          |
| Missing                                 | 6 (1.2)            | 4 (4.9)                          | 19 (2.4)                                     |                                 | 3 (3.7)                             |                                                | 6 (2.1)                                  |
| 0                                       | 45 (9.0)           | 10 (12.2)                        | 67 (8.5)                                     | 8 (12.1)                        | 6 (7.4)                             |                                                | 23 (8.1)                                 |
| 1                                       | 28 (5.6)           | 5 (6.1)                          | 48 (6.1)                                     | 1 (1.5)                         | 6 (7.4)                             |                                                | 17 (6.0)                                 |
| 2                                       | 138 (27.7)         | 18 (22.0)                        | 214 (27.2)                                   | 17 (25.8)                       | 15 (18.5)                           |                                                | 67 (23.6)                                |
| 3                                       | 119 (23.8)         | 23 (28.0)                        | 198 (25.2)                                   | 19 (28.8)                       | 28 (34.6)                           |                                                | 85 (29.9)                                |
| 4                                       | 87 (17.4)          | 12 (14.6)                        | 131 (16.7)                                   | 12 (18.2)                       | 10 (12.3)                           |                                                | 49 (17.3)                                |
| ≥5                                      | 76 (15.2)          | 10 (12.2)                        | 109 (13.9)                                   | 9 (13.6)                        | 13 (16.0)                           |                                                | 37 (13.0)                                |
| Age at first birth (years)              |                    |                                  |                                              |                                 |                                     |                                                |                                          |
| Missing                                 | 8 (1.6)            | 5 (6.1)                          | 19 (2.4)                                     | 1 (1.5)                         | 3 (3.7)                             |                                                | 5 (1.8)                                  |
| <25                                     | 269 (53.9)         | 40 (48.8)                        | 385 (49.0)                                   | 26 (39.4)                       | 45 (55.6)                           |                                                | 154 (54.2)                               |
| 25-<55                                  | 177 (35.5)         | 27 (32.9)                        | 315 (40.1)                                   | 31 (47.0)                       | 27 (33.3)                           |                                                | 102 (35.9)                               |
| No live births or never pregnant        | 45 (9.0)           | 10 (12.2)                        | 67 (8.5)                                     | 8 (12.1)                        | 6 (7.4)                             |                                                | 23 (8.1)                                 |
| Oral contraceptive use                  |                    |                                  |                                              |                                 |                                     |                                                |                                          |
| Never used oral contraceptives          | 275 (55.1)         | 60 (73.2)                        | 389 (49.5)                                   | 39 (59.1)                       | 44 (54.3)                           |                                                | 153 (53.9)                               |
| Ever used oral contraceptives           | 218 (43.7)         | 21 (25.6)                        | 389 (49.5)                                   | 26 (39.4)                       | 37 (45.7)                           |                                                | 128 (45.1)                               |
| Missing                                 | 6 (1.2)            | 1 (1.2)                          | 8 (1.0)                                      | 1 (1.5)                         |                                     |                                                | 3 (1.1)                                  |
| <b>Males</b>                            |                    |                                  |                                              |                                 |                                     |                                                |                                          |
| Year of serum collection                |                    |                                  |                                              |                                 |                                     |                                                |                                          |
| 1988                                    | 43 (8.6)           | 24 (7.5)                         |                                              | 6 (6.5)                         | 7 (7.7)                             | 147 (9.1)                                      | 24 (6.8)                                 |
| 1999                                    | 152 (30.4)         | 95 (29.8)                        |                                              | 32 (34.8)                       | 24 (26.4)                           | 477 (29.6)                                     | 96 (27.4)                                |
| 2000                                    | 280 (56.0)         | 181 (56.7)                       |                                              | 50 (54.3)                       | 50 (54.9)                           | 905 (56.2)                                     | 218 (62.1)                               |
| 2001                                    | 25 (5.0)           | 19 (6.0)                         |                                              | 4 (4.3)                         | 10 (11.0)                           | 81 (5.0)                                       | 13 (3.7)                                 |
| Age at serum collection (years)         |                    |                                  |                                              |                                 |                                     |                                                |                                          |
| <60                                     | 5 (1.0)            | 7 (2.2)                          |                                              | 1 (1.1)                         | 1 (1.1)                             | 28 (1.7)                                       | 3 (0.9)                                  |
| 60-64                                   | 78 (15.6)          | 28 (8.8)                         |                                              | 13 (14.1)                       | 9 (9.9)                             | 289 (18.0)                                     | 39 (11.1)                                |
| 65-69                                   | 156 (31.2)         | 95 (29.8)                        |                                              | 27 (29.3)                       | 39 (42.9)                           | 578 (35.9)                                     | 100 (28.5)                               |
| 70-74                                   | 158 (31.6)         | 100 (31.3)                       |                                              | 30 (32.6)                       | 29 (31.9)                           | 479 (29.8)                                     | 130 (37.0)                               |
| 75-79                                   | 83 (16.6)          | 78 (24.5)                        |                                              | 17 (18.5)                       | 10 (11.0)                           | 201 (12.5)                                     | 69 (19.7)                                |
| ≥80                                     | 20 (4.0)           | 11 (3.4)                         |                                              | 4 (4.3)                         | 3 (3.3)                             | 35 (2.2)                                       | 10 (2.8)                                 |
| Highest level of education              |                    |                                  |                                              |                                 |                                     |                                                |                                          |
| Missing                                 | 4 (0.8)            | 5 (1.6)                          |                                              |                                 |                                     | 3 (0.2)                                        | 4 (1.1)                                  |
| Highschool or less                      | 101 (20.2)         | 63 (19.7)                        |                                              | 17 (18.5)                       | 12 (13.2)                           | 252 (15.7)                                     | 73 (20.8)                                |
| Vocational/trade school or some college | 132 (26.4)         | 78 (24.5)                        |                                              | 23 (25.0)                       | 24 (26.4)                           | 379 (23.5)                                     | 73 (20.8)                                |

|                                                                              | Subcohort<br>n (%) | Bladder<br>cancer cases<br>n (%) | Breast cancer<br>cases<br>n (%) <sup>a</sup> | Kidney cancer<br>cases<br>n (%) | Pancreatic<br>cancer cases<br>n (%) | Prostate<br>cancer cases<br>n (%) <sup>a</sup> | Hematologic<br>malignancy cases<br>n (%) |
|------------------------------------------------------------------------------|--------------------|----------------------------------|----------------------------------------------|---------------------------------|-------------------------------------|------------------------------------------------|------------------------------------------|
| College graduate                                                             | 124 (24.8)         | 84 (26.3)                        |                                              | 27 (29.3)                       | 30 (33.0)                           | 439 (27.3)                                     | 96 (27.4)                                |
| Graduate school                                                              | 139 (27.8)         | 89 (27.9)                        |                                              | 25 (27.2)                       | 25 (27.5)                           | 537 (33.4)                                     | 105 (29.9)                               |
| Race/ ethnicity                                                              |                    |                                  |                                              |                                 |                                     |                                                |                                          |
| Missing                                                                      | 4 (0.8)            |                                  |                                              |                                 | 1 (1.1)                             | 6 (0.4)                                        | 2 (0.6)                                  |
| Hispanic or non-White race                                                   | 9 (1.8)            | 4 (1.3)                          |                                              | 1 (1.1)                         | 4 (4.4)                             | 24 (1.5)                                       | 4 (1.1)                                  |
| Non-Hispanic White                                                           | 487 (97.4)         | 315 (98.7)                       |                                              | 91 (98.9)                       | 86 (94.5)                           | 1580 (98.1)                                    | 345 (98.3)                               |
| Smoking status in 1997                                                       |                    |                                  |                                              |                                 |                                     |                                                |                                          |
| Missing                                                                      |                    |                                  |                                              | 1 (1.1)                         |                                     | 1 (0.1)                                        |                                          |
| Nonsmoker                                                                    | 182 (36.4)         | 67 (21.0)                        |                                              | 23 (25.0)                       | 39 (42.9)                           | 635 (39.4)                                     | 122 (34.8)                               |
| Current smoker                                                               | 18 (3.6)           | 21 (6.6)                         |                                              | 6 (6.5)                         | 2 (2.2)                             | 64 (4.0)                                       | 8 (2.3)                                  |
| Former smoker                                                                | 288 (57.6)         | 226 (70.8)                       |                                              | 61 (66.3)                       | 49 (53.8)                           | 894 (55.5)                                     | 216 (61.5)                               |
| Ever smoker (unknown if current or former)                                   | 12 (2.4)           | 5 (1.6)                          |                                              | 1 (1.1)                         | 1 (1.1)                             | 16 (1.0)                                       | 5 (1.4)                                  |
| Alcohol consumption in 1997                                                  |                    |                                  |                                              |                                 |                                     |                                                |                                          |
| Missing                                                                      | 1 (0.2)            | 1 (0.3)                          |                                              |                                 |                                     | 1 (0.1)                                        |                                          |
| Non-drinker                                                                  | 160 (32.0)         | 83 (26.0)                        |                                              | 35 (38.0)                       | 26 (28.6)                           | 507 (31.5)                                     | 127 (36.2)                               |
| <1 drink per week                                                            | 56 (11.2)          | 51 (16.0)                        |                                              | 12 (13.0)                       | 16 (17.6)                           | 193 (12.0)                                     | 40 (11.4)                                |
| 1-6 drinks per week                                                          | 177 (35.4)         | 119 (37.3)                       |                                              | 29 (31.5)                       | 34 (37.4)                           | 535 (33.2)                                     | 99 (28.2)                                |
| 1 drink per day                                                              | 73 (14.6)          | 43 (13.5)                        |                                              | 8 (8.7)                         | 8 (8.8)                             | 246 (15.3)                                     | 62 (17.7)                                |
| ≥2 drinks per day                                                            | 33 (6.6)           | 22 (6.9)                         |                                              | 8 (8.7)                         | 7 (7.7)                             | 128 (8.0)                                      | 23 (6.6)                                 |
| Body mass index (kg/m <sup>2</sup> )                                         |                    |                                  |                                              |                                 |                                     |                                                |                                          |
| Missing                                                                      | 8 (1.6)            | 4 (1.3)                          |                                              |                                 |                                     | 11 (0.7)                                       | 1 (0.3)                                  |
| <18.5                                                                        | 2 (0.4)            |                                  |                                              | 1 (1.1)                         |                                     | 3 (0.2)                                        | 4 (1.1)                                  |
| 18.5-<25                                                                     | 181 (36.2)         | 103 (32.3)                       |                                              | 21 (22.8)                       | 32 (35.2)                           | 624 (38.8)                                     | 122 (34.8)                               |
| 25-<30                                                                       | 237 (47.4)         | 173 (54.2)                       |                                              | 54 (58.7)                       | 42 (46.2)                           | 776 (48.2)                                     | 167 (47.6)                               |
| ≥30                                                                          | 72 (14.4)          | 39 (12.2)                        |                                              | 16 (17.4)                       | 17 (18.7)                           | 196 (12.2)                                     | 57 (16.2)                                |
| Physical activity                                                            |                    |                                  |                                              |                                 |                                     |                                                |                                          |
| Missing                                                                      | 1 (0.2)            |                                  |                                              |                                 | 1 (1.1)                             | 1 (0.1)                                        |                                          |
| ≥10 hours/week moderate to vigorous physical activity (metabolic equivalent) | 267 (53.4)         | 172 (53.9)                       |                                              | 47 (51.1)                       | 48 (52.7)                           | 919 (57.1)                                     | 195 (55.6)                               |
| <10 hours/week moderate to vigorous physical activity (metabolic equivalent) | 232 (46.4)         | 147 (46.1)                       |                                              | 45 (48.9)                       | 42 (46.2)                           | 690 (42.9)                                     | 156 (44.4)                               |

<sup>a</sup> Breast cancer was considered among females only and prostate cancer was considered among males only, so for these cancers, rows for “Sexes Combined” and for the sex in which the cancer was not considered are blank.

Table S4. Results of Quality Control analysis using samples run with study samples, Case-cohort study of association between PFAS and selected cancers among participants in the Cancer Prevention II LifeLink cohort, 1998-2015

| Chemical <sup>a</sup> | Mean   | Median | 25 <sup>th</sup> Pctl <sup>b</sup> | 75 <sup>th</sup> Pctl <sup>b</sup> | Within-sample variance | Batch Variance | Error Variance | Intra-batch CV <sup>b</sup> | Inter-batch CV <sup>b</sup> | Overall CV <sup>b</sup> | ICC <sup>b</sup> |
|-----------------------|--------|--------|------------------------------------|------------------------------------|------------------------|----------------|----------------|-----------------------------|-----------------------------|-------------------------|------------------|
| PFBS                  | 0.044  | 0.035  | 0.035                              | 0.035                              | 0.003                  | 3.02E-13       | 0.0004         | 0.473                       | 0.000                       | 0.473                   | 0.857            |
| PFHpA                 | 0.153  | 0.110  | 0.061                              | 0.210                              | 0.018                  | 7.23E-06       | 0.0006         | 0.165                       | 0.018                       | 0.166                   | 0.966            |
| PFNA                  | 0.843  | 0.660  | 0.490                              | 0.940                              | 0.459                  | 3.58E-04       | 0.0030         | 0.065                       | 0.022                       | 0.069                   | 0.993            |
| PFOA                  | 6.237  | 5.500  | 3.700                              | 7.300                              | 17.579                 | 0.050          | 0.0894         | 0.048                       | 0.036                       | 0.06                    | 0.992            |
| FOSA                  | 0.801  | 0.465  | 0.230                              | 0.833                              | 0.523                  | 0.143          | 0.9627         | 1.225                       | 0.472                       | 1.312                   | 0.321            |
| FOSA <sup>c</sup>     | 0.753  | 0.465  | 0.230                              | 0.830                              | 0.582                  | 0.173          | 0.2615         | 0.680                       | 0.553                       | 0.876                   | 0.573            |
| PFHxS                 | 4.297  | 2.900  | 2.000                              | 4.500                              | 18.698                 | 0.024          | 0.1396         | 0.087                       | 0.036                       | 0.094                   | 0.991            |
| PFOS                  | 22.076 | 18.000 | 13.000                             | 27.000                             | 161.101                | 0.519          | 1.4414         | 0.054                       | 0.033                       | 0.063                   | 0.988            |

<sup>a</sup> PFBS=perfluorobutane sulfonic acid, PFHpA=perfluoroheptanoic acid, PFNA=perfluorononanoic acid, PFOA=perfluorooctanoic acid, FOSA=perfluorooctane sulfonamide, PFHxS=perfluorohexane sulfonic acid, PFOS=perfluorooctane sulfonate

<sup>b</sup> Pctl=percentile, CV=coefficient of variation, ICC = intraclass correlation coefficient

<sup>c</sup> Excluded observations for one ID that had a large outlier measurement

Table S5. Percentage of samples with PFAS detections in the subcohort, Case-cohort study of association between PFAS and selected cancers among participants in the Cancer Prevention II LifeLink cohort, 1998-2015

| <b>PFAS_Type<sup>a</sup></b> | <b>Sex</b> | <b>Lowest Lower Level of Quantitation</b> | <b>Number with Detections</b> | <b>Percent Detection</b> |
|------------------------------|------------|-------------------------------------------|-------------------------------|--------------------------|
| PFBS                         | Both       | 0.05                                      | 64                            | 6.4                      |
| PFBS                         | Female     | 0.05                                      | 24                            | 4.8                      |
| PFBS                         | Male       | 0.05                                      | 40                            | 8.0                      |
| PFHpA                        | Both       | 0.05                                      | 819                           | 82.0                     |
| PFHpA                        | Female     | 0.05                                      | 393                           | 78.8                     |
| PFHpA                        | Male       | 0.05                                      | 426                           | 85.2                     |
| PFHxS                        | Both       | 0.05                                      | 997                           | 99.8                     |
| PFHxS                        | Female     | 0.05                                      | 498                           | 99.8                     |
| PFHxS                        | Male       | 0.05                                      | 499                           | 99.8                     |
| PFNA                         | Both       | 0.05                                      | 997                           | 99.8                     |
| PFNA                         | Female     | 0.05                                      | 498                           | 99.8                     |
| PFNA                         | Male       | 0.05                                      | 499                           | 99.8                     |
| PFOA                         | Both       | 0.5                                       | 987                           | 98.8                     |
| PFOA                         | Female     | 0.5                                       | 494                           | 99.0                     |
| PFOA                         | Male       | 0.5                                       | 493                           | 98.6                     |
| PFOS                         | Both       | 0.5                                       | 997                           | 99.8                     |
| PFOS                         | Female     | 0.5                                       | 498                           | 99.8                     |
| PFOS                         | Male       | 0.5                                       | 499                           | 99.8                     |

<sup>a</sup> PFBS=perfluorobutane sulfonic acid, PFHpA=perfluoroheptanoic acid, PFHxS=perfluorohexane sulfonic acid, PFNA=perfluorononanoic acid, PFOA=perfluorooctanoic acid, PFOS=perfluorooctane sulfonate

Table S6. Distribution of PFAS serum concentrations among subcohort participants (ng/ml, values below the limit of detection were imputed as the limit of detection divided by the square root of 2), Case-cohort study of association between PFAS and selected cancers among participants in the Cancer Prevention II LifeLink cohort, 1998-2015

| PFAS <sup>a</sup> | Sex    | n <sup>b</sup> | mean  | std <sup>b</sup> | min <sup>b</sup> | p25 <sup>b</sup> | p50 <sup>b</sup> | p75 <sup>b</sup> | max <sup>b</sup> | 50 <sup>th</sup> Percentile and 95% CI among adults from NHANES 1999-2000 <sup>c</sup> |
|-------------------|--------|----------------|-------|------------------|------------------|------------------|------------------|------------------|------------------|----------------------------------------------------------------------------------------|
| PFHpA             | Both   | 999            | 0.17  | 0.27             | 0.04             | 0.06             | 0.10             | 0.20             | 6.90             | <LOD <sup>b</sup>                                                                      |
| PFHpA             | Female | 499            | 0.15  | 0.33             | 0.04             | 0.06             | 0.10             | 0.18             | 6.90             |                                                                                        |
| PFHpA             | Male   | 500            | 0.18  | 0.19             | 0.04             | 0.07             | 0.11             | 0.22             | 1.60             |                                                                                        |
| PFHxS             | Both   | 999            | 4.49  | 5.42             | 0.04             | 2.00             | 3.10             | 5.10             | 95.00            | 2.00 (1.80-2.30)                                                                       |
| PFHxS             | Female | 499            | 4.33  | 5.07             | 0.04             | 1.80             | 2.80             | 5.00             | 57.00            |                                                                                        |
| PFHxS             | Male   | 500            | 4.65  | 5.75             | 0.31             | 2.10             | 3.30             | 5.30             | 95.00            |                                                                                        |
| PFNA              | Both   | 999            | 0.99  | 2.94             | 0.04             | 0.49             | 0.67             | 0.98             | 80.00            | .600 (.500-.700)                                                                       |
| PFNA              | Female | 499            | 0.93  | 1.89             | 0.04             | 0.49             | 0.67             | 0.96             | 40.00            |                                                                                        |
| PFNA              | Male   | 500            | 1.06  | 3.70             | 0.08             | 0.49             | 0.67             | 0.99             | 80.00            |                                                                                        |
| PFOA              | Both   | 999            | 6.10  | 4.54             | 0.35             | 3.90             | 5.20             | 6.90             | 54.00            | 5.20 (4.70-5.80) <sup>d</sup>                                                          |
| PFOA              | Female | 499            | 6.04  | 4.97             | 0.35             | 3.70             | 5.00             | 6.90             | 54.00            |                                                                                        |
| PFOA              | Male   | 500            | 6.16  | 4.08             | 0.35             | 4.00             | 5.20             | 6.95             | 43.00            |                                                                                        |
| PFOS              | Both   | 999            | 21.44 | 13.26            | 0.35             | 13.00            | 18.00            | 25.00            | 130.00           | 30.3 (27.9-33.9) <sup>d</sup>                                                          |
| PFOS              | Female | 499            | 21.22 | 13.46            | 0.35             | 13.00            | 18.00            | 25.00            | 130.00           |                                                                                        |
| PFOS              | Male   | 500            | 21.66 | 13.07            | 0.80             | 13.50            | 18.00            | 25.50            | 96.00            |                                                                                        |

<sup>a</sup> PFHpA=perfluoroheptanoic acid, PFHxS=perfluorohexane sulfonic acid, PFNA=perfluorononanoic acid, PFOA=perfluorooctanoic acid, PFOS=perfluorooctane sulfonate

<sup>b</sup> n=number, std=standard deviation, min=minimum, p25=25<sup>th</sup> percentile, p50=50<sup>th</sup> percentile, p75=75<sup>th</sup> percentile, max=maximum, LOD=limit of detection

<sup>c</sup> Centers for Disease Control and Prevention, U.S. Department of Health and Human Services. National Report on Human Exposure to Environmental Chemicals. Updated March 2022. Accessed 4/13/2023. <https://www.cdc.gov/exposurereport/>

<sup>d</sup> Study measurements were for the linear isomer only. Separate values for the linear and branched isomers are not available in NHANES 1999-2000 but in NHANES 2013-2014 (the closest year for which separate measurements are available), the linear isomer median for PFOA was 97% of the median for the sum, and the linear isomer of PFOS was 66% of the median for the sum.

Table S7. Spearman correlation coefficients for correlations between PFAS serum concentrations among subcohort members, Case-cohort study of association between PFAS and selected cancers among participants in the Cancer Prevention II LifeLink cohort, 1998-2015

|                   | PFHpA <sup>a</sup> | PFHxS <sup>a</sup> | PFNA <sup>a</sup> | PFOA <sup>a</sup> | PFOS <sup>a</sup> |
|-------------------|--------------------|--------------------|-------------------|-------------------|-------------------|
| <b>Both Sexes</b> |                    |                    |                   |                   |                   |
| <b>PFHpA</b>      | 1.000              | 0.172              | 0.207             | 0.512             | 0.291             |
| <b>PFHxS</b>      | 0.172              | 1.000              | 0.432             | 0.488             | 0.431             |
| <b>PFNA</b>       | 0.207              | 0.432              | 1.000             | 0.481             | 0.552             |
| <b>PFOA</b>       | 0.512              | 0.488              | 0.481             | 1.000             | 0.671             |
| <b>PFOS</b>       | 0.291              | 0.431              | 0.552             | 0.671             | 1.000             |
| <b>Females</b>    |                    |                    |                   |                   |                   |
| <b>PFHpA</b>      | 1.000              | 0.160              | 0.225             | 0.543             | 0.311             |
| <b>PFHxS</b>      | 0.160              | 1.000              | 0.399             | 0.459             | 0.403             |
| <b>PFNA</b>       | 0.225              | 0.399              | 1.000             | 0.483             | 0.542             |
| <b>PFOA</b>       | 0.543              | 0.459              | 0.483             | 1.000             | 0.699             |
| <b>PFOS</b>       | 0.311              | 0.403              | 0.542             | 0.699             | 1.000             |
| <b>Males</b>      |                    |                    |                   |                   |                   |
| <b>PFHpA</b>      | 1.000              | 0.166              | 0.191             | 0.470             | 0.269             |
| <b>PFHxS</b>      | 0.166              | 1.000              | 0.476             | 0.517             | 0.462             |
| <b>PFNA</b>       | 0.191              | 0.476              | 1.000             | 0.484             | 0.564             |
| <b>PFOA</b>       | 0.470              | 0.517              | 0.484             | 1.000             | 0.642             |
| <b>PFOS</b>       | 0.269              | 0.462              | 0.564             | 0.642             | 1.000             |

<sup>a</sup> PFHpA=perfluoroheptanoic acid, PFHxS=perfluorohexane sulfonic acid, PFNA=perfluorononanoic acid, PFOA=perfluorooctanoic acid, PFOS=perfluorooctane sulfonate

Table S8. PFAS Distributions (ng/ml) in the subcohort by categories of covariates, using values with values below the limit of detection imputed as the limit of detection divided by the square root of 2, Case-cohort study of association between PFAS and selected cancers among participants in the Cancer Prevention II LifeLink cohort, 1998-2015

|                                            | Both           |                  |                  |                  | Females        |                  |                  |                  | Males          |                  |                  |                  |
|--------------------------------------------|----------------|------------------|------------------|------------------|----------------|------------------|------------------|------------------|----------------|------------------|------------------|------------------|
|                                            | N <sup>b</sup> | P25 <sup>b</sup> | P50 <sup>b</sup> | P75 <sup>b</sup> | N <sup>b</sup> | P25 <sup>b</sup> | P50 <sup>b</sup> | P75 <sup>b</sup> | N <sup>b</sup> | P25 <sup>b</sup> | P50 <sup>b</sup> | P75 <sup>b</sup> |
| <b>PFHpA<sup>a</sup></b>                   |                |                  |                  |                  |                |                  |                  |                  |                |                  |                  |                  |
| Sex                                        |                |                  |                  |                  |                |                  |                  |                  |                |                  |                  |                  |
| Female                                     | 499            | 0.06             | 0.10             | 0.18             | 499            | 0.06             | 0.10             | 0.18             |                |                  |                  |                  |
| Male                                       | 500            | 0.07             | 0.11             | 0.22             |                |                  |                  |                  | 500            | 0.07             | 0.11             | 0.22             |
| Year of serum collection                   |                |                  |                  |                  |                |                  |                  |                  |                |                  |                  |                  |
| 1998                                       | 80             | 0.07             | 0.14             | 0.23             | 37             | 0.06             | 0.10             | 0.18             | 43             | 0.09             | 0.16             | 0.34             |
| 1999                                       | 308            | 0.06             | 0.11             | 0.20             | 156            | 0.06             | 0.11             | 0.20             | 152            | 0.07             | 0.12             | 0.21             |
| 2000                                       | 558            | 0.06             | 0.10             | 0.18             | 278            | 0.05             | 0.10             | 0.17             | 280            | 0.06             | 0.11             | 0.21             |
| 2001                                       | 53             | 0.05             | 0.10             | 0.16             | 28             | 0.04             | 0.09             | 0.15             | 25             | 0.06             | 0.10             | 0.16             |
| Age at serum collection (years)            |                |                  |                  |                  |                |                  |                  |                  |                |                  |                  |                  |
| <60                                        | 33             | 0.07             | 0.12             | 0.20             | 28             | 0.07             | 0.11             | 0.22             | 5              | 0.11             | 0.14             | 0.17             |
| 60-64                                      | 174            | 0.07             | 0.13             | 0.26             | 96             | 0.06             | 0.12             | 0.25             | 78             | 0.08             | 0.15             | 0.27             |
| 65-69                                      | 321            | 0.06             | 0.11             | 0.19             | 165            | 0.06             | 0.10             | 0.16             | 156            | 0.07             | 0.13             | 0.25             |
| 70-74                                      | 303            | 0.06             | 0.10             | 0.18             | 145            | 0.05             | 0.09             | 0.17             | 158            | 0.06             | 0.10             | 0.19             |
| 75-79                                      | 134            | 0.05             | 0.09             | 0.16             | 51             | 0.04             | 0.08             | 0.16             | 83             | 0.06             | 0.09             | 0.16             |
| ≥80                                        | 34             | 0.08             | 0.11             | 0.29             | 14             | 0.08             | 0.10             | 0.17             | 20             | 0.08             | 0.12             | 0.34             |
| Race/ethnicity                             |                |                  |                  |                  |                |                  |                  |                  |                |                  |                  |                  |
| Hispanic or non-white race                 | 14             | 0.09             | 0.14             | 0.17             | 5              | 0.14             | 0.15             | 0.17             | 9              | 0.09             | 0.10             | 0.17             |
| Non-Hispanic white                         | 981            | 0.06             | 0.10             | 0.20             | 494            | 0.05             | 0.10             | 0.18             | 487            | 0.07             | 0.11             | 0.22             |
| Highest level of education                 |                |                  |                  |                  |                |                  |                  |                  |                |                  |                  |                  |
| High school or less                        | 244            | 0.06             | 0.10             | 0.19             | 143            | 0.05             | 0.09             | 0.17             | 101            | 0.07             | 0.12             | 0.24             |
| Some college or vocational/trade school    | 302            | 0.06             | 0.10             | 0.19             | 170            | 0.05             | 0.10             | 0.18             | 132            | 0.06             | 0.11             | 0.20             |
| College graduate                           | 252            | 0.06             | 0.11             | 0.21             | 128            | 0.06             | 0.10             | 0.18             | 124            | 0.08             | 0.13             | 0.24             |
| Graduate school                            | 196            | 0.07             | 0.10             | 0.19             | 57             | 0.06             | 0.10             | 0.18             | 139            | 0.07             | 0.10             | 0.21             |
| Smoking status in 1997                     |                |                  |                  |                  |                |                  |                  |                  |                |                  |                  |                  |
| Non-smoker                                 | 457            | 0.06             | 0.10             | 0.17             | 275            | 0.06             | 0.09             | 0.16             | 182            | 0.06             | 0.10             | 0.20             |
| Current smoker                             | 39             | 0.07             | 0.12             | 0.23             | 21             | 0.07             | 0.10             | 0.18             | 18             | 0.08             | 0.14             | 0.23             |
| Former smoker                              | 488            | 0.07             | 0.12             | 0.21             | 200            | 0.05             | 0.10             | 0.19             | 288            | 0.07             | 0.12             | 0.24             |
| Ever smoker (unknown if current or former) | 15             | 0.11             | 0.15             | 0.35             | 3              | 0.16             | 0.44             | 0.71             | 12             | 0.09             | 0.14             | 0.29             |
| Alcohol consumption in 1997                |                |                  |                  |                  |                |                  |                  |                  |                |                  |                  |                  |
| Non-drinker                                | 378            | 0.05             | 0.10             | 0.18             | 218            | 0.05             | 0.09             | 0.17             | 160            | 0.07             | 0.11             | 0.22             |
| <1 drink/week                              | 135            | 0.06             | 0.11             | 0.20             | 79             | 0.04             | 0.10             | 0.18             | 56             | 0.07             | 0.13             | 0.25             |
| 1-6 drinks/week                            | 326            | 0.07             | 0.10             | 0.18             | 149            | 0.06             | 0.10             | 0.15             | 177            | 0.07             | 0.11             | 0.22             |
| 1 drink/day                                | 110            | 0.07             | 0.14             | 0.23             | 37             | 0.10             | 0.17             | 0.27             | 73             | 0.06             | 0.11             | 0.20             |
| ≥2 drinks/day                              | 48             | 0.10             | 0.16             | 0.28             | 15             | 0.09             | 0.18             | 0.37             | 33             | 0.10             | 0.14             | 0.27             |
| Body mass index (kg/m <sup>2</sup> )       |                |                  |                  |                  |                |                  |                  |                  |                |                  |                  |                  |
| <18.5                                      | 14             | 0.07             | 0.11             | 0.19             | 12             | 0.07             | 0.08             | 0.18             | 2              | 0.16             | 0.88             | 1.60             |
| 18.5-<25                                   | 426            | 0.06             | 0.10             | 0.18             | 245            | 0.05             | 0.09             | 0.16             | 181            | 0.06             | 0.10             | 0.21             |
| 25-<30                                     | 405            | 0.07             | 0.11             | 0.22             | 168            | 0.06             | 0.10             | 0.19             | 237            | 0.08             | 0.12             | 0.24             |
| ≥30                                        | 144            | 0.06             | 0.13             | 0.20             | 72             | 0.06             | 0.13             | 0.21             | 72             | 0.07             | 0.11             | 0.20             |
| <b>PFHxS<sup>a</sup></b>                   |                |                  |                  |                  |                |                  |                  |                  |                |                  |                  |                  |
| Sex                                        |                |                  |                  |                  |                |                  |                  |                  |                |                  |                  |                  |
| Female                                     | 499            | 1.80             | 2.80             | 5.00             | 499            | 1.80             | 2.80             | 5.00             |                |                  |                  |                  |
| Male                                       | 500            | 2.10             | 3.30             | 5.30             |                |                  |                  |                  | 500            | 2.10             | 3.30             | 5.30             |
| Year of serum collection                   |                |                  |                  |                  |                |                  |                  |                  |                |                  |                  |                  |
| 1998                                       | 80             | 2.00             | 3.20             | 4.50             | 37             | 1.80             | 2.50             | 4.20             | 43             | 2.30             | 3.60             | 5.30             |
| 1999                                       | 308            | 1.85             | 2.90             | 4.50             | 156            | 1.75             | 2.70             | 4.40             | 152            | 1.95             | 3.15             | 4.70             |
| 2000                                       | 558            | 2.00             | 3.10             | 5.40             | 278            | 1.90             | 3.00             | 5.60             | 280            | 2.10             | 3.30             | 5.35             |
| 2001                                       | 53             | 2.00             | 3.40             | 5.30             | 28             | 1.90             | 3.05             | 5.20             | 25             | 2.00             | 3.90             | 5.30             |
| Age at serum collection (years)            |                |                  |                  |                  |                |                  |                  |                  |                |                  |                  |                  |
| <60                                        | 33             | 2.00             | 2.60             | 4.60             | 28             | 1.90             | 2.60             | 4.20             | 5              | 2.50             | 5.80             | 24.00            |
| 60-64                                      | 174            | 2.10             | 3.05             | 4.60             | 96             | 1.95             | 2.95             | 4.50             | 78             | 2.20             | 3.25             | 4.90             |
| 65-69                                      | 321            | 2.00             | 3.30             | 5.00             | 165            | 1.70             | 2.80             | 5.20             | 156            | 2.30             | 3.60             | 4.90             |
| 70-74                                      | 303            | 1.80             | 2.90             | 5.30             | 145            | 1.90             | 2.90             | 5.60             | 158            | 1.80             | 3.10             | 4.90             |

|                                            | Both           |                  |                  |                  | Females        |                  |                  |                  | Males          |                  |                  |                  |
|--------------------------------------------|----------------|------------------|------------------|------------------|----------------|------------------|------------------|------------------|----------------|------------------|------------------|------------------|
|                                            | N <sup>b</sup> | P25 <sup>b</sup> | P50 <sup>b</sup> | P75 <sup>b</sup> | N <sup>b</sup> | P25 <sup>b</sup> | P50 <sup>b</sup> | P75 <sup>b</sup> | N <sup>b</sup> | P25 <sup>b</sup> | P50 <sup>b</sup> | P75 <sup>b</sup> |
| 75-79                                      | 134            | 2.00             | 3.05             | 4.70             | 51             | 1.70             | 2.40             | 4.60             | 83             | 2.20             | 3.30             | 5.20             |
| ≥80                                        | 34             | 2.60             | 4.10             | 7.60             | 14             | 2.60             | 3.75             | 6.90             | 20             | 2.45             | 4.45             | 8.60             |
| Race/ethnicity                             |                |                  |                  |                  |                |                  |                  |                  |                |                  |                  |                  |
| Hispanic or non-white race                 | 14             | 2.20             | 3.60             | 6.10             | 5              | 2.20             | 4.40             | 7.40             | 9              | 2.50             | 3.00             | 4.50             |
| Non-Hispanic white                         | 981            | 1.90             | 3.10             | 5.10             | 494            | 1.80             | 2.80             | 5.00             | 487            | 2.10             | 3.30             | 5.30             |
| Highest level of education                 |                |                  |                  |                  |                |                  |                  |                  |                |                  |                  |                  |
| High school or less                        | 244            | 1.90             | 2.85             | 4.75             | 143            | 1.80             | 2.80             | 4.40             | 101            | 2.00             | 2.90             | 5.30             |
| Some college or vocational/trade school    | 302            | 2.00             | 3.10             | 5.30             | 170            | 1.90             | 2.85             | 5.00             | 132            | 2.20             | 3.35             | 5.90             |
| College graduate                           | 252            | 2.00             | 3.30             | 5.25             | 128            | 1.90             | 3.20             | 5.30             | 124            | 2.15             | 3.30             | 5.10             |
| Graduate school                            | 196            | 1.90             | 3.20             | 4.70             | 57             | 1.60             | 2.30             | 5.00             | 139            | 2.10             | 3.40             | 4.60             |
| Smoking status in 1997                     |                |                  |                  |                  |                |                  |                  |                  |                |                  |                  |                  |
| Non-smoker                                 | 457            | 1.80             | 2.90             | 4.80             | 275            | 1.70             | 2.60             | 4.90             | 182            | 2.10             | 3.25             | 4.80             |
| Current smoker                             | 39             | 1.90             | 3.00             | 4.00             | 21             | 1.50             | 2.80             | 3.80             | 18             | 2.20             | 3.30             | 5.00             |
| Former smoker                              | 488            | 2.00             | 3.25             | 5.30             | 200            | 2.05             | 3.00             | 5.10             | 288            | 2.00             | 3.40             | 5.40             |
| Ever smoker (unknown if current or former) | 15             | 2.30             | 3.20             | 6.50             | 3              | 6.30             | 6.50             | 57.00            | 12             | 2.30             | 2.90             | 5.95             |
| Alcohol consumption in 1997                |                |                  |                  |                  |                |                  |                  |                  |                |                  |                  |                  |
| Non-drinker                                | 378            | 1.70             | 2.60             | 4.20             | 218            | 1.60             | 2.45             | 4.30             | 160            | 1.85             | 2.70             | 4.05             |
| <1 drink/week                              | 135            | 1.90             | 3.20             | 5.40             | 79             | 1.80             | 2.70             | 5.20             | 56             | 2.25             | 3.55             | 7.00             |
| 1-6 drinks/week                            | 326            | 2.20             | 3.40             | 5.50             | 149            | 2.10             | 3.40             | 5.60             | 177            | 2.30             | 3.40             | 5.40             |
| 1 drink/day                                | 110            | 2.20             | 3.90             | 6.10             | 37             | 2.20             | 3.60             | 5.80             | 73             | 2.30             | 3.90             | 6.10             |
| ≥2 drinks/day                              | 48             | 1.95             | 3.20             | 5.00             | 15             | 1.60             | 2.60             | 5.20             | 33             | 2.00             | 3.40             | 4.80             |
| Body mass index (kg/m <sup>2</sup> )       |                |                  |                  |                  |                |                  |                  |                  |                |                  |                  |                  |
| <18.5                                      | 14             | 1.70             | 2.20             | 5.60             | 12             | 1.75             | 3.55             | 5.80             | 2              | 1.70             | 2.00             | 2.30             |
| 18.5-<25                                   | 426            | 2.00             | 3.20             | 5.30             | 245            | 1.90             | 2.90             | 4.90             | 181            | 2.20             | 3.60             | 5.60             |
| 25-<30                                     | 405            | 2.00             | 3.00             | 4.60             | 168            | 1.95             | 2.70             | 4.85             | 237            | 2.00             | 3.20             | 4.50             |
| ≥30                                        | 144            | 1.90             | 3.00             | 5.35             | 72             | 1.70             | 2.60             | 4.60             | 72             | 2.10             | 3.65             | 5.90             |
| <b>PFNA<sup>a</sup></b>                    |                |                  |                  |                  |                |                  |                  |                  |                |                  |                  |                  |
| Sex                                        |                |                  |                  |                  |                |                  |                  |                  |                |                  |                  |                  |
| Female                                     | 499            | 0.49             | 0.67             | 0.96             | 499            | 0.49             | 0.67             | 0.96             |                |                  |                  |                  |
| Male                                       | 500            | 0.49             | 0.67             | 0.99             |                |                  |                  |                  | 500            | 0.49             | 0.67             | 0.99             |
| Year of serum collection                   |                |                  |                  |                  |                |                  |                  |                  |                |                  |                  |                  |
| 1998                                       | 80             | 0.52             | 0.65             | 1.00             | 37             | 0.47             | 0.64             | 0.91             | 43             | 0.52             | 0.66             | 1.00             |
| 1999                                       | 308            | 0.45             | 0.65             | 1.00             | 156            | 0.45             | 0.64             | 0.98             | 152            | 0.47             | 0.66             | 1.00             |
| 2000                                       | 558            | 0.51             | 0.69             | 0.95             | 278            | 0.53             | 0.72             | 0.97             | 280            | 0.50             | 0.67             | 0.95             |
| 2001                                       | 53             | 0.47             | 0.65             | 1.00             | 28             | 0.45             | 0.57             | 0.90             | 25             | 0.49             | 0.78             | 1.20             |
| Age at serum collection (years)            |                |                  |                  |                  |                |                  |                  |                  |                |                  |                  |                  |
| <60                                        | 33             | 0.52             | 0.81             | 0.96             | 28             | 0.53             | 0.83             | 1.20             | 5              | 0.45             | 0.59             | 0.90             |
| 60-64                                      | 174            | 0.52             | 0.68             | 1.00             | 96             | 0.53             | 0.69             | 0.99             | 78             | 0.49             | 0.68             | 1.00             |
| 65-69                                      | 321            | 0.50             | 0.71             | 0.96             | 165            | 0.46             | 0.68             | 0.96             | 156            | 0.52             | 0.72             | 0.97             |
| 70-74                                      | 303            | 0.46             | 0.63             | 0.92             | 145            | 0.47             | 0.66             | 0.98             | 158            | 0.46             | 0.62             | 0.86             |
| 75-79                                      | 134            | 0.47             | 0.67             | 1.00             | 51             | 0.42             | 0.61             | 0.91             | 83             | 0.53             | 0.79             | 1.20             |
| ≥80                                        | 34             | 0.56             | 0.76             | 0.95             | 14             | 0.64             | 0.76             | 0.93             | 20             | 0.49             | 0.75             | 1.03             |
| Race/ethnicity                             |                |                  |                  |                  |                |                  |                  |                  |                |                  |                  |                  |
| Hispanic or non-white race                 | 14             | 0.52             | 0.88             | 2.20             | 5              | 0.65             | 1.20             | 2.50             | 9              | 0.46             | 0.86             | 1.80             |
| Non-Hispanic white                         | 981            | 0.49             | 0.67             | 0.98             | 494            | 0.48             | 0.67             | 0.96             | 487            | 0.49             | 0.67             | 0.99             |
| Highest level of education                 |                |                  |                  |                  |                |                  |                  |                  |                |                  |                  |                  |
| High school or less                        | 244            | 0.46             | 0.62             | 0.90             | 143            | 0.45             | 0.62             | 0.88             | 101            | 0.47             | 0.62             | 0.90             |
| Some college or vocational/trade school    | 302            | 0.50             | 0.67             | 0.98             | 170            | 0.49             | 0.65             | 0.95             | 132            | 0.51             | 0.71             | 1.00             |
| College graduate                           | 252            | 0.54             | 0.71             | 1.00             | 128            | 0.56             | 0.76             | 1.10             | 124            | 0.53             | 0.67             | 0.93             |
| Graduate school                            | 196            | 0.49             | 0.71             | 1.10             | 57             | 0.55             | 0.66             | 0.95             | 139            | 0.47             | 0.72             | 1.10             |
| Smoking status in 1997                     |                |                  |                  |                  |                |                  |                  |                  |                |                  |                  |                  |
| Non-smoker                                 | 457            | 0.46             | 0.65             | 0.95             | 275            | 0.45             | 0.63             | 0.91             | 182            | 0.51             | 0.70             | 1.00             |
| Current smoker                             | 39             | 0.47             | 0.60             | 0.96             | 21             | 0.48             | 0.58             | 0.78             | 18             | 0.45             | 0.65             | 1.00             |
| Former smoker                              | 488            | 0.52             | 0.71             | 1.00             | 200            | 0.56             | 0.78             | 1.00             | 288            | 0.49             | 0.66             | 0.97             |
| Ever smoker (unknown if current or former) | 15             | 0.56             | 0.78             | 0.97             | 3              | 0.55             | 0.92             | 1.10             | 12             | 0.58             | 0.77             | 0.95             |
| Alcohol consumption in 1997                |                |                  |                  |                  |                |                  |                  |                  |                |                  |                  |                  |
| Non-drinker                                | 378            | 0.44             | 0.61             | 0.89             | 218            | 0.45             | 0.61             | 0.91             | 160            | 0.44             | 0.61             | 0.89             |
| <1 drink/week                              | 135            | 0.47             | 0.66             | 0.95             | 79             | 0.45             | 0.61             | 0.86             | 56             | 0.51             | 0.78             | 1.05             |
| 1-6 drinks/week                            | 326            | 0.53             | 0.76             | 1.00             | 149            | 0.60             | 0.82             | 1.10             | 177            | 0.50             | 0.66             | 1.00             |
| 1 drink/day                                | 110            | 0.58             | 0.81             | 1.10             | 37             | 0.63             | 0.90             | 1.00             | 73             | 0.54             | 0.77             | 1.20             |



|                                            | Both           |                  |                  |                  | Females        |                  |                  |                  | Males          |                  |                  |                  |
|--------------------------------------------|----------------|------------------|------------------|------------------|----------------|------------------|------------------|------------------|----------------|------------------|------------------|------------------|
|                                            | N <sup>b</sup> | P25 <sup>b</sup> | P50 <sup>b</sup> | P75 <sup>b</sup> | N <sup>b</sup> | P25 <sup>b</sup> | P50 <sup>b</sup> | P75 <sup>b</sup> | N <sup>b</sup> | P25 <sup>b</sup> | P50 <sup>b</sup> | P75 <sup>b</sup> |
| ≥2 drinks/day                              | 48             | 0.52             | 0.77             | 1.15             | 15             | 0.44             | 0.77             | 1.20             | 33             | 0.53             | 0.76             | 0.97             |
| Body mass index (kg/m <sup>2</sup> )       |                |                  |                  |                  |                |                  |                  |                  |                |                  |                  |                  |
| <18.5                                      | 14             | 0.56             | 0.62             | 0.67             | 12             | 0.53             | 0.62             | 0.79             | 2              | 0.56             | 0.61             | 0.65             |
| 18.5-<25                                   | 426            | 0.50             | 0.71             | 1.00             | 245            | 0.52             | 0.72             | 1.00             | 181            | 0.49             | 0.68             | 1.00             |
| 25-<30                                     | 405            | 0.48             | 0.65             | 0.95             | 168            | 0.46             | 0.65             | 0.93             | 237            | 0.49             | 0.66             | 0.98             |
| ≥30                                        | 144            | 0.49             | 0.64             | 0.92             | 72             | 0.49             | 0.64             | 0.89             | 72             | 0.50             | 0.66             | 0.94             |
| <b>PFOA<sup>a</sup></b>                    |                |                  |                  |                  |                |                  |                  |                  |                |                  |                  |                  |
| Sex                                        |                |                  |                  |                  |                |                  |                  |                  |                |                  |                  |                  |
| Female                                     | 499            | 3.70             | 5.00             | 6.90             | 499            | 3.70             | 5.00             | 6.90             |                |                  |                  |                  |
| Male                                       | 500            | 4.00             | 5.20             | 6.95             |                |                  |                  |                  | 500            | 4.00             | 5.20             | 6.95             |
| Year of serum collection                   |                |                  |                  |                  |                |                  |                  |                  |                |                  |                  |                  |
| 1998                                       | 80             | 4.10             | 5.00             | 6.70             | 37             | 4.00             | 4.80             | 6.70             | 43             | 4.30             | 5.10             | 6.60             |
| 1999                                       | 308            | 3.60             | 5.10             | 7.05             | 156            | 3.40             | 4.75             | 6.70             | 152            | 3.90             | 5.30             | 7.20             |
| 2000                                       | 558            | 3.90             | 5.20             | 6.90             | 278            | 3.80             | 5.20             | 7.10             | 280            | 4.00             | 5.10             | 6.80             |
| 2001                                       | 53             | 4.50             | 5.50             | 6.90             | 28             | 4.05             | 5.20             | 5.70             | 25             | 4.70             | 6.20             | 9.00             |
| Age at serum collection (years)            |                |                  |                  |                  |                |                  |                  |                  |                |                  |                  |                  |
| <60                                        | 33             | 4.30             | 5.20             | 6.60             | 28             | 4.30             | 5.35             | 6.65             | 5              | 5.00             | 5.20             | 6.60             |
| 60-64                                      | 174            | 4.30             | 5.70             | 7.40             | 96             | 4.05             | 5.70             | 7.20             | 78             | 4.50             | 5.75             | 7.90             |
| 65-69                                      | 321            | 3.80             | 5.50             | 7.10             | 165            | 3.54             | 5.20             | 7.10             | 156            | 4.20             | 5.60             | 7.25             |
| 70-74                                      | 303            | 3.70             | 4.80             | 6.50             | 145            | 3.54             | 4.70             | 6.40             | 158            | 3.90             | 4.85             | 6.70             |
| 75-79                                      | 134            | 3.70             | 4.80             | 6.20             | 51             | 3.20             | 4.20             | 6.20             | 83             | 4.10             | 5.00             | 6.20             |
| ≥80                                        | 34             | 3.80             | 5.40             | 7.30             | 14             | 4.30             | 6.15             | 7.30             | 20             | 3.52             | 4.60             | 7.90             |
| Race/ethnicity                             |                |                  |                  |                  |                |                  |                  |                  |                |                  |                  |                  |
| Hispanic or non-white race                 | 14             | 4.40             | 5.70             | 6.40             | 5              | 4.70             | 6.00             | 6.40             | 9              | 4.40             | 5.60             | 6.20             |
| Non-Hispanic white                         | 981            | 3.90             | 5.20             | 6.90             | 494            | 3.70             | 5.00             | 6.90             | 487            | 4.00             | 5.20             | 7.00             |
| Highest level of education                 |                |                  |                  |                  |                |                  |                  |                  |                |                  |                  |                  |
| High school or less                        | 244            | 3.85             | 5.20             | 7.20             | 143            | 3.60             | 5.10             | 7.20             | 101            | 4.10             | 5.20             | 7.20             |
| Some college or vocational/trade school    | 302            | 3.80             | 5.10             | 7.20             | 170            | 3.80             | 5.10             | 7.10             | 132            | 3.90             | 5.40             | 7.20             |
| College graduate                           | 252            | 4.00             | 5.30             | 6.90             | 128            | 3.85             | 5.15             | 6.90             | 124            | 4.20             | 5.40             | 6.90             |
| Graduate school                            | 196            | 3.80             | 4.90             | 6.55             | 57             | 3.54             | 4.40             | 6.50             | 139            | 3.90             | 5.00             | 6.70             |
| Smoking status in 1997                     |                |                  |                  |                  |                |                  |                  |                  |                |                  |                  |                  |
| Non-smoker                                 | 457            | 3.70             | 4.90             | 6.70             | 275            | 3.70             | 4.80             | 6.70             | 182            | 3.80             | 5.10             | 6.70             |
| Current smoker                             | 39             | 3.50             | 4.50             | 6.50             | 21             | 3.40             | 4.50             | 7.00             | 18             | 3.60             | 4.85             | 5.90             |
| Former smoker                              | 488            | 4.10             | 5.40             | 7.15             | 200            | 3.85             | 5.30             | 7.10             | 288            | 4.10             | 5.40             | 7.20             |
| Ever smoker (unknown if current or former) | 15             | 4.20             | 6.20             | 8.70             | 3              | 8.40             | 8.70             | 9.40             | 12             | 4.05             | 4.95             | 7.10             |
| Alcohol consumption in 1997                |                |                  |                  |                  |                |                  |                  |                  |                |                  |                  |                  |
| Non-drinker                                | 378            | 3.54             | 4.80             | 6.90             | 218            | 3.40             | 4.60             | 6.90             | 160            | 3.95             | 5.00             | 7.05             |
| <1 drink/week                              | 135            | 4.00             | 5.30             | 6.90             | 79             | 3.80             | 4.80             | 6.40             | 56             | 4.60             | 5.75             | 7.35             |
| 1-6 drinks/week                            | 326            | 4.00             | 5.30             | 6.80             | 149            | 4.00             | 5.60             | 7.00             | 177            | 4.00             | 5.20             | 6.70             |
| 1 drink/day                                | 110            | 3.90             | 5.65             | 7.40             | 37             | 4.60             | 6.30             | 7.40             | 73             | 3.70             | 5.30             | 7.20             |
| ≥2 drinks/day                              | 48             | 4.30             | 5.25             | 7.15             | 15             | 3.80             | 4.80             | 5.80             | 33             | 4.40             | 5.90             | 7.40             |
| Body mass index (kg/m <sup>2</sup> )       |                |                  |                  |                  |                |                  |                  |                  |                |                  |                  |                  |
| <18.5                                      | 14             | 3.00             | 3.95             | 6.50             | 12             | 2.85             | 3.85             | 5.45             | 2              | 3.90             | 6.10             | 8.30             |
| 18.5-<25                                   | 426            | 3.80             | 5.05             | 6.90             | 245            | 3.70             | 4.90             | 6.80             | 181            | 3.90             | 5.10             | 6.90             |
| 25-<30                                     | 405            | 3.90             | 5.20             | 6.90             | 168            | 3.90             | 5.10             | 7.00             | 237            | 4.00             | 5.30             | 6.80             |
| ≥30                                        | 144            | 4.15             | 5.70             | 7.30             | 72             | 3.70             | 5.60             | 7.45             | 72             | 4.55             | 5.70             | 7.20             |
| <b>PFOS<sup>a</sup></b>                    |                |                  |                  |                  |                |                  |                  |                  |                |                  |                  |                  |
| Sex                                        |                |                  |                  |                  |                |                  |                  |                  |                |                  |                  |                  |
| Female                                     | 499            | 13.00            | 18.00            | 25.00            | 499            | 13.00            | 18.00            | 25.00            |                |                  |                  |                  |
| Male                                       | 500            | 13.50            | 18.00            | 25.50            |                |                  |                  |                  | 500            | 13.50            | 18.00            | 25.50            |
| Year of serum collection                   |                |                  |                  |                  |                |                  |                  |                  |                |                  |                  |                  |
| 1998                                       | 80             | 14.00            | 21.00            | 35.50            | 37             | 14.00            | 22.00            | 37.00            | 43             | 15.00            | 21.00            | 28.00            |
| 1999                                       | 308            | 14.00            | 19.00            | 26.00            | 156            | 13.00            | 19.00            | 25.50            | 152            | 14.50            | 19.00            | 26.00            |
| 2000                                       | 558            | 13.00            | 17.00            | 24.00            | 278            | 13.00            | 18.00            | 25.00            | 280            | 13.00            | 17.00            | 24.00            |
| 2001                                       | 53             | 14.00            | 21.00            | 27.00            | 28             | 12.50            | 16.50            | 23.00            | 25             | 15.00            | 24.00            | 32.00            |
| Age at serum collection (years)            |                |                  |                  |                  |                |                  |                  |                  |                |                  |                  |                  |
| <60                                        | 33             | 16.00            | 20.00            | 26.00            | 28             | 16.00            | 20.50            | 26.00            | 5              | 18.00            | 19.00            | 27.00            |
| 60-64                                      | 174            | 15.00            | 19.00            | 26.00            | 96             | 15.00            | 20.00            | 27.50            | 78             | 14.00            | 19.00            | 26.00            |
| 65-69                                      | 321            | 13.00            | 19.00            | 28.00            | 165            | 13.00            | 18.00            | 28.00            | 156            | 14.00            | 20.00            | 27.50            |
| 70-74                                      | 303            | 12.00            | 17.00            | 24.00            | 145            | 12.00            | 16.00            | 23.00            | 158            | 12.00            | 17.00            | 24.00            |

|                                            | Both           |                  |                  |                  | Females        |                  |                  |                  | Males          |                  |                  |                  |
|--------------------------------------------|----------------|------------------|------------------|------------------|----------------|------------------|------------------|------------------|----------------|------------------|------------------|------------------|
|                                            | N <sup>b</sup> | P25 <sup>b</sup> | P50 <sup>b</sup> | P75 <sup>b</sup> | N <sup>b</sup> | P25 <sup>b</sup> | P50 <sup>b</sup> | P75 <sup>b</sup> | N <sup>b</sup> | P25 <sup>b</sup> | P50 <sup>b</sup> | P75 <sup>b</sup> |
| 75-79                                      | 134            | 12.00            | 16.00            | 25.00            | 51             | 10.00            | 15.00            | 24.00            | 83             | 14.00            | 17.00            | 26.00            |
| ≥80                                        | 34             | 15.00            | 17.50            | 21.00            | 14             | 15.00            | 17.00            | 25.00            | 20             | 14.00            | 18.50            | 21.00            |
| Race/ethnicity                             |                |                  |                  |                  |                |                  |                  |                  |                |                  |                  |                  |
| Hispanic or non-white race                 | 14             | 15.00            | 19.50            | 33.00            | 5              | 16.00            | 33.00            | 40.00            | 9              | 12.00            | 18.00            | 26.00            |
| Non-Hispanic white                         | 981            | 13.00            | 18.00            | 25.00            | 494            | 13.00            | 18.00            | 25.00            | 487            | 13.00            | 18.00            | 25.00            |
| Highest level of education                 |                |                  |                  |                  |                |                  |                  |                  |                |                  |                  |                  |
| High school or less                        | 244            | 12.00            | 18.00            | 26.00            | 143            | 12.00            | 18.00            | 25.00            | 101            | 14.00            | 19.00            | 28.00            |
| Some college or vocational/trade school    | 302            | 13.00            | 19.00            | 26.00            | 170            | 13.00            | 18.00            | 25.00            | 132            | 13.50            | 19.00            | 27.50            |
| College graduate                           | 252            | 14.00            | 18.00            | 26.00            | 128            | 14.50            | 19.00            | 27.50            | 124            | 13.00            | 17.00            | 24.00            |
| Graduate school                            | 196            | 13.00            | 18.00            | 24.00            | 57             | 13.00            | 16.00            | 23.00            | 139            | 14.00            | 18.00            | 24.00            |
| Smoking status in 1997                     |                |                  |                  |                  |                |                  |                  |                  |                |                  |                  |                  |
| Non-smoker                                 | 457            | 13.00            | 18.00            | 24.00            | 275            | 12.00            | 17.00            | 25.00            | 182            | 14.00            | 18.50            | 24.00            |
| Current smoker                             | 39             | 11.00            | 16.00            | 22.00            | 21             | 12.00            | 18.00            | 23.00            | 18             | 10.00            | 15.00            | 19.00            |
| Former smoker                              | 488            | 14.00            | 18.50            | 26.00            | 200            | 14.00            | 19.00            | 26.00            | 288            | 14.00            | 18.00            | 26.50            |
| Ever smoker (unknown if current or former) | 15             | 14.00            | 20.00            | 28.00            | 3              | 17.00            | 34.00            | 40.00            | 12             | 13.00            | 17.50            | 24.00            |
| Alcohol consumption in 1997                |                |                  |                  |                  |                |                  |                  |                  |                |                  |                  |                  |
| Non-drinker                                | 378            | 12.00            | 18.00            | 26.00            | 218            | 12.00            | 19.00            | 25.00            | 160            | 12.00            | 18.00            | 26.00            |
| <1 drink/week                              | 135            | 14.00            | 17.00            | 25.00            | 79             | 14.00            | 17.00            | 25.00            | 56             | 13.50            | 17.50            | 26.00            |
| 1-6 drinks/week                            | 326            | 14.00            | 18.00            | 25.00            | 149            | 13.00            | 18.00            | 24.00            | 177            | 14.00            | 18.00            | 25.00            |
| 1 drink/day                                | 110            | 14.00            | 19.50            | 28.00            | 37             | 15.00            | 20.00            | 28.00            | 73             | 13.00            | 19.00            | 27.00            |
| ≥2 drinks/day                              | 48             | 14.00            | 18.00            | 26.00            | 15             | 13.00            | 16.00            | 23.00            | 33             | 15.00            | 21.00            | 26.00            |
| Body mass index (kg/m <sup>2</sup> )       |                |                  |                  |                  |                |                  |                  |                  |                |                  |                  |                  |
| <18.5                                      | 14             | 10.00            | 13.50            | 23.00            | 12             | 10.00            | 13.50            | 20.50            | 2              | 13.00            | 18.50            | 24.00            |
| 18.5-<25                                   | 426            | 13.00            | 18.00            | 25.00            | 245            | 13.00            | 17.00            | 25.00            | 181            | 14.00            | 18.00            | 25.00            |
| 25-<30                                     | 405            | 13.00            | 18.00            | 26.00            | 168            | 13.00            | 19.00            | 26.00            | 237            | 13.00            | 18.00            | 26.00            |
| ≥30                                        | 144            | 14.00            | 19.00            | 27.00            | 72             | 15.00            | 19.50            | 27.50            | 72             | 14.00            | 18.50            | 26.50            |

<sup>a</sup> PFHpA=perfluoroheptanoic acid, PFHxS=perfluorohexane sulfonic acid, PFNA=perfluorononanoic acid, PFOA=perfluorooctanoic acid, PFOS=perfluorooctane sulfonate

<sup>b</sup> N=number, P25=25th percentile, p50=50th percentile, P75=75th percentile

Table S9. Results from primary models for overall cancer sites, Case-cohort study of association between PFAS and selected cancers among participants in the Cancer Prevention II LifeLink cohort, 1998-2015. Continuous results are for log<sub>2</sub> transformed concentrations.

| Cancer Type | Type of PFAS <sup>a</sup> | Exposure Measure | Concentration Range (ng/ml) | Both Sexes                   |              |                          |         | Females                      |              |                          |         | Males                        |              |                          |         |
|-------------|---------------------------|------------------|-----------------------------|------------------------------|--------------|--------------------------|---------|------------------------------|--------------|--------------------------|---------|------------------------------|--------------|--------------------------|---------|
|             |                           |                  |                             | Number in Model <sup>b</sup> |              | HR (95% CI) <sup>c</sup> | p-value | Number in Model <sup>b</sup> |              | HR (95% CI) <sup>c</sup> | p-value | Number in Model <sup>b</sup> |              | HR (95% CI) <sup>c</sup> | p-value |
|             |                           |                  |                             | Sub-cohort                   | Cancer Cases |                          |         | Sub-cohort                   | Cancer Cases |                          |         | Sub-cohort                   | Cancer Cases |                          |         |
| Bladder     | PFHxS                     | Quartile 1       | <2.100                      | 277                          | 99           |                          |         | 157                          | 30           |                          |         | 120                          | 69           |                          |         |
| Bladder     | PFHxS                     | Quartile 2       | 2.100-<3.000                | 191                          | 91           | 1.40 (0.91, 2.16)        | 0.122   | 102                          | 15           | 0.74 (0.36, 1.54)        | 0.422   | 89                           | 76           | 1.62 (0.94, 2.79)        | 0.081   |
| Bladder     | PFHxS                     | Quartile 3       | 3.000-<4.900                | 260                          | 105          | 0.99 (0.68, 1.45)        | 0.972   | 110                          | 22           | 0.89 (0.46, 1.72)        | 0.728   | 150                          | 83           | 0.99 (0.63, 1.57)        | 0.982   |
| Bladder     | PFHxS                     | Quartile 4       | >=4.900                     | 260                          | 101          | 1.05 (0.71, 1.53)        | 0.816   | 128                          | 15           | 0.50 (0.23, 1.08)        | 0.079   | 132                          | 86           | 1.17 (0.74, 1.86)        | 0.505   |
| Bladder     | PFHxS                     | Continuous       |                             |                              |              | 0.95 (0.84, 1.08)        | 0.463   |                              |              | 0.77 (0.58, 1.02)        | 0.072   |                              |              | 0.97 (0.84, 1.13)        | 0.701   |
| Bladder     | PFNA                      | Quartile 1       | <0.470                      | 220                          | 95           |                          |         | 117                          | 22           |                          |         | 103                          | 73           |                          |         |
| Bladder     | PFNA                      | Quartile 2       | 0.470-<0.680                | 279                          | 101          | 0.79 (0.54, 1.15)        | 0.221   | 135                          | 21           | 0.69 (0.31, 1.52)        | 0.359   | 144                          | 80           | 0.84 (0.53, 1.33)        | 0.464   |
| Bladder     | PFNA                      | Quartile 3       | 0.680-<1.000                | 250                          | 90           | 0.92 (0.62, 1.36)        | 0.679   | 130                          | 16           | 0.59 (0.26, 1.31)        | 0.194   | 120                          | 74           | 1.05 (0.66, 1.68)        | 0.825   |
| Bladder     | PFNA                      | Quartile 4       | >=1.000                     | 239                          | 110          | 1.01 (0.68, 1.51)        | 0.959   | 115                          | 23           | 0.98 (0.47, 2.02)        | 0.954   | 124                          | 87           | 1.06 (0.65, 1.72)        | 0.809   |
| Bladder     | PFNA                      | Continuous       |                             |                              |              | 0.96 (0.82, 1.11)        | 0.559   |                              |              | 0.90 (0.65, 1.23)        | 0.502   |                              |              | 0.98 (0.83, 1.17)        | 0.834   |
| Bladder     | PFOA                      | Quartile 1       | <3.800                      | 222                          | 95           |                          |         | 127                          | 25           |                          |         | 95                           | 70           |                          |         |
| Bladder     | PFOA                      | Quartile 2       | 3.800-<5.100                | 253                          | 97           | 0.84 (0.56, 1.26)        | 0.394   | 123                          | 25           | 1.23 (0.60, 2.52)        | 0.581   | 130                          | 72           | 0.80 (0.49, 1.32)        | 0.378   |
| Bladder     | PFOA                      | Quartile 3       | 5.100-<6.700                | 227                          | 99           | 0.87 (0.58, 1.30)        | 0.494   | 103                          | 12           | 0.68 (0.27, 1.70)        | 0.410   | 124                          | 87           | 0.92 (0.57, 1.49)        | 0.734   |
| Bladder     | PFOA                      | Quartile 4       | >=6.700                     | 286                          | 105          | 0.86 (0.58, 1.27)        | 0.446   | 144                          | 20           | 0.81 (0.37, 1.78)        | 0.600   | 142                          | 85           | 0.87 (0.54, 1.40)        | 0.574   |
| Bladder     | PFOA                      | Continuous       |                             |                              |              | 0.93 (0.77, 1.13)        | 0.478   |                              |              | 0.91 (0.63, 1.31)        | 0.619   |                              |              | 0.93 (0.74, 1.17)        | 0.520   |
| Bladder     | PFOS                      | Quartile 1       | <13.000                     | 217                          | 95           |                          |         | 113                          | 27           |                          |         | 104                          | 68           |                          |         |
| Bladder     | PFOS                      | Quartile 2       | 13.000-<18.000              | 252                          | 92           | 0.81 (0.54, 1.21)        | 0.310   | 130                          | 17           | 0.51 (0.24, 1.05)        | 0.068   | 122                          | 75           | 0.92 (0.57, 1.49)        | 0.748   |
| Bladder     | PFOS                      | Quartile 3       | 18.000-<25.000              | 248                          | 106          | 1.07 (0.72, 1.60)        | 0.723   | 119                          | 20           | 0.65 (0.33, 1.30)        | 0.227   | 129                          | 86           | 1.20 (0.75, 1.94)        | 0.446   |
| Bladder     | PFOS                      | Quartile 4       | >=25.000                    | 271                          | 103          | 0.96 (0.64, 1.44)        | 0.855   | 135                          | 18           | 0.63 (0.29, 1.35)        | 0.233   | 136                          | 85           | 1.10 (0.68, 1.78)        | 0.699   |
| Bladder     | PFOS                      | Continuous       |                             |                              |              | 1.01 (0.86, 1.20)        | 0.890   |                              |              | 0.82 (0.58, 1.16)        | 0.255   |                              |              | 1.06 (0.87, 1.28)        | 0.574   |
| Kidney      | PFHxS                     | Quartile 1       | <2.100                      | 277                          | 38           |                          |         | 157                          | 15           |                          |         | 120                          | 23           |                          |         |
| Kidney      | PFHxS                     | Quartile 2       | 2.100-<3.300                | 244                          | 39           | 1.13 (0.67, 1.93)        | 0.643   | 125                          | 19           | 1.60 (0.70, 3.67)        | 0.264   | 119                          | 20           | 0.93 (0.42, 2.10)        | 0.870   |
| Kidney      | PFHxS                     | Quartile 3       | 3.300-<4.900                | 207                          | 40           | 1.35 (0.80, 2.27)        | 0.255   | 87                           | 13           | 1.90 (0.76, 4.71)        | 0.169   | 120                          | 27           | 1.20 (0.60, 2.40)        | 0.607   |
| Kidney      | PFHxS                     | Quartile 4       | >=4.900                     | 260                          | 39           | 1.12 (0.66, 1.89)        | 0.676   | 128                          | 18           | 1.46 (0.62, 3.41)        | 0.383   | 132                          | 21           | 0.91 (0.43, 1.92)        | 0.807   |
| Kidney      | PFHxS                     | Continuous       |                             |                              |              | 1.06 (0.91, 1.24)        | 0.451   |                              |              | 1.18 (0.89, 1.57)        | 0.249   |                              |              | 0.98 (0.81, 1.19)        | 0.859   |
| Kidney      | PFNA                      | Quartile 1       | <0.510                      | 264                          | 39           |                          |         | 133                          | 16           |                          |         | 131                          | 23           |                          |         |
| Kidney      | PFNA                      | Quartile 2       | 0.510-<0.680                | 235                          | 40           | 1.15 (0.69, 1.92)        | 0.601   | 119                          | 18           | 0.95 (0.39, 2.34)        | 0.918   | 116                          | 22           | 1.16 (0.57, 2.36)        | 0.677   |
| Kidney      | PFNA                      | Quartile 3       | 0.680-<1.000                | 250                          | 35           | 1.01 (0.60, 1.69)        | 0.980   | 130                          | 16           | 0.89 (0.38, 2.07)        | 0.783   | 120                          | 19           | 1.04 (0.51, 2.12)        | 0.914   |
| Kidney      | PFNA                      | Quartile 4       | >=1.000                     | 239                          | 42           | 1.25 (0.74, 2.11)        | 0.397   | 115                          | 15           | 1.02 (0.39, 2.67)        | 0.968   | 124                          | 27           | 1.60 (0.78, 3.28)        | 0.202   |
| Kidney      | PFNA                      | Continuous       |                             |                              |              | 1.07 (0.90, 1.28)        | 0.428   |                              |              | 0.95 (0.70, 1.29)        | 0.731   |                              |              | 1.20 (0.95, 1.52)        | 0.124   |
| Kidney      | PFOA                      | Quartile 1       | <3.900                      | 244                          | 39           |                          |         | 143                          | 17           |                          |         | 101                          | 22           |                          |         |
| Kidney      | PFOA                      | Quartile 2       | 3.900-<5.200                | 247                          | 39           | 0.93 (0.56, 1.56)        | 0.784   | 115                          | 13           | 0.80 (0.34, 1.87)        | 0.604   | 132                          | 26           | 0.87 (0.43, 1.75)        | 0.702   |
| Kidney      | PFOA                      | Quartile 3       | 5.200-<7.300                | 285                          | 39           | 0.83 (0.49, 1.40)        | 0.476   | 136                          | 17           | 1.04 (0.45, 2.44)        | 0.919   | 149                          | 22           | 0.65 (0.31, 1.35)        | 0.249   |
| Kidney      | PFOA                      | Quartile 4       | >=7.300                     | 212                          | 39           | 1.20 (0.71, 2.04)        | 0.494   | 103                          | 18           | 1.94 (0.87, 4.35)        | 0.106   | 109                          | 21           | 0.81 (0.39, 1.68)        | 0.566   |
| Kidney      | PFOA                      | Continuous       |                             |                              |              | 1.08 (0.88, 1.33)        | 0.450   |                              |              | 1.33 (0.97, 1.83)        | 0.076   |                              |              | 0.89 (0.66, 1.20)        | 0.460   |
| Kidney      | PFOS                      | Quartile 1       | <13.000                     | 217                          | 35           |                          |         | 113                          | 19           |                          |         | 104                          | 16           |                          |         |
| Kidney      | PFOS                      | Quartile 2       | 13.000-<18.000              | 252                          | 39           | 0.92 (0.54, 1.57)        | 0.767   | 130                          | 10           | 0.37 (0.14, 0.94)        | 0.037   | 122                          | 29           | 1.72 (0.82, 3.61)        | 0.150   |
| Kidney      | PFOS                      | Quartile 3       | 18.000-<26.000              | 275                          | 42           | 0.97 (0.58, 1.63)        | 0.918   | 134                          | 17           | 0.76 (0.35, 1.66)        | 0.497   | 141                          | 25           | 1.39 (0.66, 2.93)        | 0.392   |
| Kidney      | PFOS                      | Quartile 4       | >=26.000                    | 244                          | 40           | 1.14 (0.67, 1.92)        | 0.632   | 120                          | 19           | 0.93 (0.40, 2.15)        | 0.869   | 124                          | 21           | 1.33 (0.62, 2.85)        | 0.468   |
| Kidney      | PFOS                      | Continuous       |                             |                              |              | 1.03 (0.84, 1.26)        | 0.796   |                              |              | 1.06 (0.70, 1.59)        | 0.788   |                              |              | 1.00 (0.79, 1.28)        | 0.978   |
| Pancreatic  | PFHxS                     | Quartile 1       | <1.800                      | 187                          | 41           |                          |         | 112                          | 24           |                          |         | 75                           | 17           |                          |         |
| Pancreatic  | PFHxS                     | Quartile 2       | 1.800-<2.950                | 281                          | 45           | 0.81 (0.49, 1.34)        | 0.412   | 147                          | 22           | 0.64 (0.33, 1.28)        | 0.207   | 134                          | 23           | 0.91 (0.42, 1.97)        | 0.810   |

| Cancer Type | Type of PFAS <sup>a</sup> | Exposure Measure | Concentration Range (ng/ml) | Both Sexes                   |              |                          |         | Females                      |              |                          |         | Males                        |              |                          |         |
|-------------|---------------------------|------------------|-----------------------------|------------------------------|--------------|--------------------------|---------|------------------------------|--------------|--------------------------|---------|------------------------------|--------------|--------------------------|---------|
|             |                           |                  |                             | Number in Model <sup>b</sup> |              | HR (95% CI) <sup>c</sup> | p-value | Number in Model <sup>b</sup> |              | HR (95% CI) <sup>c</sup> | p-value | Number in Model <sup>b</sup> |              | HR (95% CI) <sup>c</sup> | p-value |
|             |                           |                  |                             | Sub-cohort                   | Cancer Cases |                          |         | Sub-cohort                   | Cancer Cases |                          |         | Sub-cohort                   | Cancer Cases |                          |         |
| Pancreatic  | PFHxS                     | Quartile 3       | 2.950-<4.850                | 260                          | 42           | 0.75 (0.45, 1.24)        | 0.258   | 110                          | 14           | 0.53 (0.23, 1.20)        | 0.126   | 150                          | 28           | 0.80 (0.39, 1.67)        | 0.555   |
| Pancreatic  | PFHxS                     | Quartile 4       | >=4.850                     | 260                          | 43           | 0.80 (0.48, 1.34)        | 0.400   | 128                          | 21           | 0.70 (0.34, 1.43)        | 0.323   | 132                          | 22           | 0.85 (0.39, 1.88)        | 0.695   |
| Pancreatic  | PFHxS                     | Continuous       |                             |                              |              | 0.96 (0.81, 1.14)        | 0.643   |                              |              | 0.98 (0.75, 1.29)        | 0.908   |                              |              | 0.93 (0.74, 1.18)        | 0.560   |
| Pancreatic  | PFNA                      | Quartile 1       | <0.450                      | 192                          | 42           |                          |         | 96                           | 23           |                          |         | 96                           | 19           |                          |         |
| Pancreatic  | PFNA                      | Quartile 2       | 0.450-<0.630                | 244                          | 43           | 0.78 (0.47, 1.28)        | 0.321   | 124                          | 18           | 0.53 (0.25, 1.10)        | 0.088   | 120                          | 25           | 1.12 (0.54, 2.29)        | 0.766   |
| Pancreatic  | PFNA                      | Quartile 3       | 0.630-<1.000                | 313                          | 41           | 0.59 (0.36, 0.97)        | 0.036   | 162                          | 20           | 0.44 (0.20, 0.96)        | 0.039   | 151                          | 21           | 0.70 (0.34, 1.45)        | 0.337   |
| Pancreatic  | PFNA                      | Quartile 4       | >=1.000                     | 239                          | 45           | 0.85 (0.51, 1.42)        | 0.539   | 115                          | 20           | 0.58 (0.26, 1.28)        | 0.177   | 124                          | 25           | 1.06 (0.50, 2.25)        | 0.873   |
| Pancreatic  | PFNA                      | Continuous       |                             |                              |              | 0.89 (0.72, 1.10)        | 0.286   |                              |              | 0.83 (0.62, 1.12)        | 0.228   |                              |              | 0.90 (0.66, 1.23)        | 0.520   |
| Pancreatic  | PFOA                      | Quartile 1       | <3.850                      | 244                          | 43           |                          |         | 143                          | 21           |                          |         | 101                          | 22           |                          |         |
| Pancreatic  | PFOA                      | Quartile 2       | 3.850-<5.100                | 231                          | 42           | 1.03 (0.63, 1.68)        | 0.895   | 107                          | 21           | 1.30 (0.65, 2.58)        | 0.462   | 124                          | 21           | 0.82 (0.39, 1.72)        | 0.595   |
| Pancreatic  | PFOA                      | Quartile 3       | 5.100-<6.300                | 175                          | 41           | 1.25 (0.75, 2.06)        | 0.392   | 76                           | 14           | 1.29 (0.54, 3.07)        | 0.571   | 99                           | 27           | 1.05 (0.51, 2.17)        | 0.899   |
| Pancreatic  | PFOA                      | Quartile 4       | >=6.300                     | 338                          | 45           | 0.75 (0.46, 1.23)        | 0.251   | 171                          | 25           | 0.93 (0.44, 1.97)        | 0.852   | 167                          | 20           | 0.52 (0.25, 1.08)        | 0.079   |
| Pancreatic  | PFOA                      | Continuous       |                             |                              |              | 0.94 (0.74, 1.21)        | 0.650   |                              |              | 1.14 (0.78, 1.67)        | 0.492   |                              |              | 0.71 (0.52, 0.96)        | 0.025   |
| Pancreatic  | PFOS                      | Quartile 1       | <12.000                     | 170                          | 39           |                          |         | 90                           | 22           |                          |         | 80                           | 17           |                          |         |
| Pancreatic  | PFOS                      | Quartile 2       | 12.000-<18.000              | 299                          | 44           | 0.64 (0.39, 1.06)        | 0.083   | 153                          | 18           | 0.48 (0.22, 1.02)        | 0.055   | 146                          | 26           | 0.85 (0.39, 1.84)        | 0.679   |
| Pancreatic  | PFOS                      | Quartile 3       | 18.000-<25.000              | 248                          | 42           | 0.75 (0.45, 1.24)        | 0.263   | 119                          | 18           | 0.61 (0.28, 1.30)        | 0.199   | 129                          | 24           | 0.87 (0.40, 1.90)        | 0.735   |
| Pancreatic  | PFOS                      | Quartile 4       | >=25.000                    | 271                          | 46           | 0.75 (0.45, 1.25)        | 0.269   | 135                          | 23           | 0.66 (0.31, 1.44)        | 0.299   | 136                          | 23           | 0.83 (0.38, 1.81)        | 0.637   |
| Pancreatic  | PFOS                      | Continuous       |                             |                              |              | 0.87 (0.70, 1.10)        | 0.242   |                              |              | 0.89 (0.63, 1.25)        | 0.494   |                              |              | 0.87 (0.63, 1.21)        | 0.411   |
| Hematologic | PFHxS                     | Quartile 1       | <2.000                      | 245                          | 151          |                          |         | 141                          | 86           |                          |         | 104                          | 65           |                          |         |
| Hematologic | PFHxS                     | Quartile 2       | 2.000-<3.000                | 223                          | 156          | 1.17 (0.85, 1.60)        | 0.335   | 118                          | 69           | 0.88 (0.57, 1.37)        | 0.583   | 105                          | 87           | 1.73 (1.05, 2.85)        | 0.033   |
| Hematologic | PFHxS                     | Quartile 3       | 3.000-<5.200                | 274                          | 159          | 0.91 (0.67, 1.24)        | 0.548   | 119                          | 58           | 0.73 (0.46, 1.16)        | 0.183   | 155                          | 101          | 1.19 (0.76, 1.86)        | 0.453   |
| Hematologic | PFHxS                     | Quartile 4       | >=5.200                     | 246                          | 160          | 1.05 (0.77, 1.43)        | 0.763   | 119                          | 68           | 0.80 (0.50, 1.28)        | 0.347   | 127                          | 92           | 1.43 (0.90, 2.28)        | 0.134   |
| Hematologic | PFHxS                     | Continuous       |                             |                              |              | 1.03 (0.93, 1.13)        | 0.617   |                              |              | 0.97 (0.83, 1.13)        | 0.661   |                              |              | 1.07 (0.92, 1.23)        | 0.381   |
| Hematologic | PFNA                      | Quartile 1       | <0.450                      | 192                          | 153          |                          |         | 96                           | 70           |                          |         | 96                           | 83           |                          |         |
| Hematologic | PFNA                      | Quartile 2       | 0.450-<0.650                | 270                          | 159          | 0.71 (0.52, 0.96)        | 0.028   | 136                          | 76           | 0.64 (0.41, 1.01)        | 0.056   | 134                          | 83           | 0.73 (0.47, 1.13)        | 0.159   |
| Hematologic | PFNA                      | Quartile 3       | 0.650-<1.000                | 287                          | 153          | 0.66 (0.48, 0.90)        | 0.009   | 150                          | 66           | 0.45 (0.28, 0.73)        | 0.001   | 137                          | 87           | 0.80 (0.51, 1.24)        | 0.320   |
| Hematologic | PFNA                      | Quartile 4       | >=1.000                     | 239                          | 161          | 0.83 (0.60, 1.14)        | 0.245   | 115                          | 69           | 0.66 (0.40, 1.10)        | 0.109   | 124                          | 92           | 1.00 (0.63, 1.58)        | 0.995   |
| Hematologic | PFNA                      | Continuous       |                             |                              |              | 0.94 (0.83, 1.06)        | 0.312   |                              |              | 0.84 (0.69, 1.01)        | 0.066   |                              |              | 1.02 (0.86, 1.21)        | 0.817   |
| Hematologic | PFOA                      | Quartile 1       | <3.800                      | 222                          | 148          |                          |         | 127                          | 73           |                          |         | 95                           | 75           |                          |         |
| Hematologic | PFOA                      | Quartile 2       | 3.800-<5.000                | 237                          | 162          | 1.01 (0.74, 1.38)        | 0.965   | 116                          | 70           | 0.90 (0.57, 1.44)        | 0.670   | 121                          | 92           | 1.08 (0.68, 1.71)        | 0.751   |
| Hematologic | PFOA                      | Quartile 3       | 5.000-<6.700                | 243                          | 158          | 0.99 (0.72, 1.36)        | 0.937   | 110                          | 75           | 1.08 (0.67, 1.74)        | 0.759   | 133                          | 83           | 0.89 (0.56, 1.40)        | 0.611   |
| Hematologic | PFOA                      | Quartile 4       | >=6.700                     | 286                          | 158          | 0.84 (0.62, 1.15)        | 0.287   | 144                          | 63           | 0.66 (0.40, 1.07)        | 0.094   | 142                          | 95           | 0.96 (0.61, 1.51)        | 0.857   |
| Hematologic | PFOA                      | Continuous       |                             |                              |              | 0.92 (0.80, 1.06)        | 0.248   |                              |              | 0.88 (0.73, 1.06)        | 0.172   |                              |              | 0.94 (0.75, 1.17)        | 0.566   |
| Hematologic | PFOS                      | Quartile 1       | <12.000                     | 170                          | 130          |                          |         | 90                           | 63           |                          |         | 80                           | 67           |                          |         |
| Hematologic | PFOS                      | Quartile 2       | 12.000-<17.000              | 262                          | 159          | 0.82 (0.59, 1.13)        | 0.220   | 135                          | 83           | 0.73 (0.45, 1.18)        | 0.203   | 127                          | 76           | 0.81 (0.50, 1.32)        | 0.402   |
| Hematologic | PFOS                      | Quartile 3       | 17.000-<24.000              | 251                          | 170          | 0.95 (0.69, 1.31)        | 0.746   | 123                          | 68           | 0.71 (0.44, 1.16)        | 0.169   | 128                          | 102          | 1.17 (0.74, 1.85)        | 0.505   |
| Hematologic | PFOS                      | Quartile 4       | >=24.000                    | 305                          | 167          | 0.79 (0.57, 1.09)        | 0.148   | 149                          | 67           | 0.56 (0.34, 0.91)        | 0.019   | 156                          | 100          | 1.01 (0.63, 1.61)        | 0.965   |
| Hematologic | PFOS                      | Continuous       |                             |                              |              | 0.92 (0.81, 1.04)        | 0.161   |                              |              | 0.79 (0.66, 0.95)        | 0.013   |                              |              | 1.00 (0.84, 1.20)        | 0.977   |
| Breast      | PFHxS                     | Quartile 1       | <1.700                      |                              |              |                          |         | 99                           | 164          |                          |         |                              |              |                          |         |
| Breast      | PFHxS                     | Quartile 2       | 1.700-<2.800                |                              |              |                          |         | 142                          | 222          | 0.90 (0.62, 1.28)        | 0.547   |                              |              |                          |         |
| Breast      | PFHxS                     | Quartile 3       | 2.800-<5.200                |                              |              |                          |         | 137                          | 195          | 0.80 (0.56, 1.16)        | 0.238   |                              |              |                          |         |
| Breast      | PFHxS                     | Quartile 4       | >=5.200                     |                              |              |                          |         | 119                          | 199          | 0.94 (0.64, 1.38)        | 0.742   |                              |              |                          |         |
| Breast      | PFHxS                     | Continuous       |                             |                              |              |                          |         |                              |              | 1.01 (0.90, 1.13)        | 0.894   |                              |              |                          |         |
| Breast      | PFNA                      | Quartile 1       | <0.460                      |                              |              |                          |         | 104                          | 183          |                          |         |                              |              |                          |         |
| Breast      | PFNA                      | Quartile 2       | 0.460-<0.670                |                              |              |                          |         | 141                          | 202          | 0.66 (0.46, 0.94)        | 0.022   |                              |              |                          |         |

| Cancer Type | Type of PFAS <sup>a</sup> | Exposure Measure | Concentration Range (ng/ml) | Both Sexes                   |              |                          | Females |                              |                   | Males                    |         |                              |                   |                          |         |
|-------------|---------------------------|------------------|-----------------------------|------------------------------|--------------|--------------------------|---------|------------------------------|-------------------|--------------------------|---------|------------------------------|-------------------|--------------------------|---------|
|             |                           |                  |                             | Number in Model <sup>b</sup> |              | HR (95% CI) <sup>c</sup> | p-value | Number in Model <sup>b</sup> |                   | HR (95% CI) <sup>c</sup> | p-value | Number in Model <sup>b</sup> |                   | HR (95% CI) <sup>c</sup> | p-value |
|             |                           |                  |                             | Sub-cohort                   | Cancer Cases |                          |         | Sub-cohort                   | Cancer Cases      |                          |         | Sub-cohort                   | Cancer Cases      |                          |         |
| Breast      | PFNA                      | Quartile 3       | 0.670-<1.000                |                              |              |                          | 137     | 181                          | 0.57 (0.39, 0.82) | 0.003                    |         |                              |                   |                          |         |
| Breast      | PFNA                      | Quartile 4       | >=1.000                     |                              |              |                          | 115     | 214                          | 0.81 (0.55, 1.19) | 0.282                    |         |                              |                   |                          |         |
| Breast      | PFNA                      | Continuous       |                             |                              |              |                          |         |                              | 0.92 (0.80, 1.05) | 0.223                    |         |                              |                   |                          |         |
| Breast      | PFOA                      | Quartile 1       | <3.700                      |                              |              |                          | 118     | 193                          |                   |                          |         |                              |                   |                          |         |
| Breast      | PFOA                      | Quartile 2       | 3.700-<5.000                |                              |              |                          | 125     | 196                          | 0.80 (0.56, 1.15) | 0.226                    |         |                              |                   |                          |         |
| Breast      | PFOA                      | Quartile 3       | 5.000-<6.900                |                              |              |                          | 121     | 189                          | 0.75 (0.52, 1.09) | 0.135                    |         |                              |                   |                          |         |
| Breast      | PFOA                      | Quartile 4       | >=6.900                     |                              |              |                          | 133     | 202                          | 0.82 (0.57, 1.17) | 0.269                    |         |                              |                   |                          |         |
| Breast      | PFOA                      | Continuous       |                             |                              |              |                          |         |                              | 0.96 (0.82, 1.12) | 0.582                    |         |                              |                   |                          |         |
| Breast      | PFOS                      | Quartile 1       | <12.000                     |                              |              |                          | 90      | 160                          |                   |                          |         |                              |                   |                          |         |
| Breast      | PFOS                      | Quartile 2       | 12.000-<17.000              |                              |              |                          | 135     | 195                          | 0.66 (0.45, 0.97) | 0.034                    |         |                              |                   |                          |         |
| Breast      | PFOS                      | Quartile 3       | 17.000-<24.000              |                              |              |                          | 123     | 211                          | 0.84 (0.57, 1.23) | 0.367                    |         |                              |                   |                          |         |
| Breast      | PFOS                      | Quartile 4       | >=24.000                    |                              |              |                          | 149     | 214                          | 0.70 (0.48, 1.01) | 0.056                    |         |                              |                   |                          |         |
| Breast      | PFOS                      | Continuous       |                             |                              |              |                          |         |                              | 0.87 (0.75, 1.01) | 0.074                    |         |                              |                   |                          |         |
| Prostate    | PFHxS                     | Quartile 1       | <2.200                      |                              |              |                          |         |                              |                   |                          | 128     | 386                          |                   |                          |         |
| Prostate    | PFHxS                     | Quartile 2       | 2.200-<3.300                |                              |              |                          |         |                              |                   |                          | 111     | 401                          | 1.27 (0.93, 1.75) | 0.135                    |         |
| Prostate    | PFHxS                     | Quartile 3       | 3.300-<5.100                |                              |              |                          |         |                              |                   |                          | 124     | 396                          | 0.99 (0.73, 1.34) | 0.930                    |         |
| Prostate    | PFHxS                     | Quartile 4       | >=5.100                     |                              |              |                          |         |                              |                   |                          | 128     | 416                          | 1.13 (0.84, 1.53) | 0.409                    |         |
| Prostate    | PFHxS                     | Continuous       |                             |                              |              |                          |         |                              |                   |                          |         |                              | 1.02 (0.93, 1.13) | 0.657                    |         |
| Prostate    | PFNA                      | Quartile 1       | <0.490                      |                              |              |                          |         |                              |                   |                          | 115     | 389                          |                   |                          |         |
| Prostate    | PFNA                      | Quartile 2       | 0.490-<0.700                |                              |              |                          |         |                              |                   |                          | 138     | 392                          | 0.81 (0.60, 1.09) | 0.161                    |         |
| Prostate    | PFNA                      | Quartile 3       | 0.700-<1.000                |                              |              |                          |         |                              |                   |                          | 114     | 388                          | 1.04 (0.76, 1.41) | 0.820                    |         |
| Prostate    | PFNA                      | Quartile 4       | >=1.000                     |                              |              |                          |         |                              |                   |                          | 124     | 430                          | 1.03 (0.76, 1.41) | 0.835                    |         |
| Prostate    | PFNA                      | Continuous       |                             |                              |              |                          |         |                              |                   |                          |         |                              | 1.02 (0.91, 1.15) | 0.686                    |         |
| Prostate    | PFOA                      | Quartile 1       | <4.000                      |                              |              |                          |         |                              |                   |                          | 112     | 398                          |                   |                          |         |
| Prostate    | PFOA                      | Quartile 2       | 4.000-<5.300                |                              |              |                          |         |                              |                   |                          | 133     | 391                          | 0.82 (0.60, 1.11) | 0.203                    |         |
| Prostate    | PFOA                      | Quartile 3       | 5.300-<6.900                |                              |              |                          |         |                              |                   |                          | 117     | 405                          | 0.93 (0.68, 1.27) | 0.629                    |         |
| Prostate    | PFOA                      | Quartile 4       | >=6.900                     |                              |              |                          |         |                              |                   |                          | 129     | 405                          | 0.83 (0.61, 1.14) | 0.252                    |         |
| Prostate    | PFOA                      | Continuous       |                             |                              |              |                          |         |                              |                   |                          |         |                              | 0.93 (0.79, 1.08) | 0.321                    |         |
| Prostate    | PFOS                      | Quartile 1       | <14.000                     |                              |              |                          |         |                              |                   |                          | 123     | 389                          |                   |                          |         |
| Prostate    | PFOS                      | Quartile 2       | 14.000-<19.000              |                              |              |                          |         |                              |                   |                          | 129     | 392                          | 0.94 (0.70, 1.26) | 0.658                    |         |
| Prostate    | PFOS                      | Quartile 3       | 19.000-<26.000              |                              |              |                          |         |                              |                   |                          | 115     | 410                          | 1.11 (0.81, 1.50) | 0.518                    |         |
| Prostate    | PFOS                      | Quartile 4       | >=26.000                    |                              |              |                          |         |                              |                   |                          | 124     | 408                          | 1.08 (0.80, 1.46) | 0.623                    |         |
| Prostate    | PFOS                      | Continuous       |                             |                              |              |                          |         |                              |                   |                          |         |                              | 1.00 (0.88, 1.14) | 0.986                    |         |

<sup>a</sup> PFHxS=perfluorohexane sulfonic acid, PFNA=perfluorononanoic acid, PFOA=perfluorooctanoic acid, PFOS=perfluorooctane sulfonate

<sup>b</sup> All models had separate baseline hazards by sex or were restricted to one sex. The primary models controlled for year of serum sample collection (single-year categories), age at serum collection (<60, 60–64, 65–69, 70–74, 75–79, ≥80 years), race (non-Hispanic white, other), education (high school graduate or less, vocational/trade school or some college, college graduate, graduate school), smoking status (current smoker, former smoker, ever smoked but unknown if current or former, never smoked), and alcohol consumption (non-drinker, <1 drink/week, 1–6 drinks/week, 1 drink/day, ≥2 drinks/day).

<sup>c</sup> HR=hazard ratio, CI=confidence interval

Table S10. Results from primary models for histologic subtypes, Case-cohort study of association between PFAS and selected cancers among participants in the Cancer Prevention II LifeLink cohort, 1998-2015. Continuous results are for log2 transformed concentrations.

| Cancer Type <sup>a</sup> | Type of PFAS <sup>b</sup> | Exposure Measure | Concentration Range (ng/ml) | Both Sexes                   |              |                          |         | Females                      |              |                          |         | Males                        |              |                          |         |  |
|--------------------------|---------------------------|------------------|-----------------------------|------------------------------|--------------|--------------------------|---------|------------------------------|--------------|--------------------------|---------|------------------------------|--------------|--------------------------|---------|--|
|                          |                           |                  |                             | Number in Model <sup>c</sup> |              | HR (95% CI) <sup>d</sup> | p-value | Number in Model <sup>c</sup> |              | HR (95% CI) <sup>d</sup> | p-value | Number in Model <sup>c</sup> |              | HR (95% CI) <sup>d</sup> | p-value |  |
|                          |                           |                  |                             | Sub-cohort                   | Cancer Cases |                          |         | Sub-cohort                   | Cancer Cases |                          |         | Sub-cohort                   | Cancer Cases |                          |         |  |
| <b>Bladder</b>           |                           |                  |                             |                              |              |                          |         |                              |              |                          |         |                              |              |                          |         |  |
| TCC-B                    | PFHxS                     | Quartile 1       | <2.100                      | 277                          | 96           |                          |         | 157                          | 29           |                          |         | 120                          | 67           |                          |         |  |
| TCC-B                    | PFHxS                     | Quartile 2       | 2.100-<3.100                | 213                          | 96           | 1.40 (0.92, 2.14)        | 0.117   | 115                          | 17           | 0.73 (0.36, 1.47)        | 0.377   | 98                           | 79           | 1.63 (0.95, 2.79)        | 0.077   |  |
| TCC-B                    | PFHxS                     | Quartile 3       | 3.100-<4.900                | 238                          | 93           | 0.97 (0.65, 1.43)        | 0.871   | 97                           | 19           | 0.96 (0.48, 1.89)        | 0.895   | 141                          | 74           | 0.96 (0.60, 1.54)        | 0.880   |  |
| TCC-B                    | PFHxS                     | Quartile 4       | >=4.900                     | 260                          | 100          | 1.07 (0.73, 1.57)        | 0.735   | 128                          | 15           | 0.53 (0.25, 1.13)        | 0.100   | 132                          | 85           | 1.19 (0.75, 1.90)        | 0.463   |  |
| TCC-B                    | PFHxS                     | Continuous       |                             |                              |              | 0.95 (0.84, 1.09)        | 0.479   |                              |              | 0.78 (0.59, 1.03)        | 0.084   |                              |              | 0.97 (0.84, 1.13)        | 0.697   |  |
| TCC-B                    | PFNA                      | Quartile 1       | <0.470                      | 220                          | 92           |                          |         | 117                          | 21           |                          |         | 103                          | 71           |                          |         |  |
| TCC-B                    | PFNA                      | Quartile 2       | 0.470-<0.680                | 279                          | 97           | 0.78 (0.53, 1.15)        | 0.218   | 135                          | 20           | 0.71 (0.32, 1.58)        | 0.398   | 144                          | 77           | 0.84 (0.53, 1.33)        | 0.449   |  |
| TCC-B                    | PFNA                      | Quartile 3       | 0.680-<1.000                | 250                          | 89           | 0.94 (0.63, 1.39)        | 0.759   | 130                          | 16           | 0.63 (0.28, 1.40)        | 0.255   | 120                          | 73           | 1.07 (0.67, 1.70)        | 0.781   |  |
| TCC-B                    | PFNA                      | Quartile 4       | >=1.000                     | 239                          | 107          | 1.02 (0.68, 1.53)        | 0.911   | 115                          | 23           | 1.05 (0.50, 2.17)        | 0.903   | 124                          | 84           | 1.06 (0.65, 1.72)        | 0.823   |  |
| TCC-B                    | PFNA                      | Continuous       |                             |                              |              | 0.96 (0.83, 1.12)        | 0.644   |                              |              | 0.92 (0.67, 1.26)        | 0.582   |                              |              | 0.99 (0.83, 1.17)        | 0.877   |  |
| TCC-B                    | PFOA                      | Quartile 1       | <3.800                      | 222                          | 92           |                          |         | 127                          | 25           |                          |         | 95                           | 67           |                          |         |  |
| TCC-B                    | PFOA                      | Quartile 2       | 3.800-<5.200                | 269                          | 99           | 0.82 (0.55, 1.23)        | 0.345   | 131                          | 24           | 1.07 (0.52, 2.17)        | 0.860   | 138                          | 75           | 0.81 (0.49, 1.32)        | 0.393   |  |
| TCC-B                    | PFOA                      | Quartile 3       | 5.200-<6.800                | 226                          | 95           | 0.86 (0.57, 1.29)        | 0.463   | 102                          | 13           | 0.73 (0.30, 1.78)        | 0.493   | 124                          | 82           | 0.90 (0.55, 1.47)        | 0.666   |  |
| TCC-B                    | PFOA                      | Quartile 4       | >=6.800                     | 271                          | 99           | 0.88 (0.59, 1.32)        | 0.543   | 137                          | 18           | 0.74 (0.34, 1.64)        | 0.464   | 134                          | 81           | 0.93 (0.57, 1.50)        | 0.761   |  |
| TCC-B                    | PFOA                      | Continuous       |                             |                              |              | 0.94 (0.78, 1.14)        | 0.521   |                              |              | 0.92 (0.64, 1.34)        | 0.676   |                              |              | 0.93 (0.74, 1.17)        | 0.550   |  |
| TCC-B                    | PFOS                      | Quartile 1       | <13.000                     | 217                          | 92           |                          |         | 113                          | 26           |                          |         | 104                          | 66           |                          |         |  |
| TCC-B                    | PFOS                      | Quartile 2       | 13.000-<18.000              | 252                          | 88           | 0.80 (0.53, 1.20)        | 0.280   | 130                          | 16           | 0.49 (0.24, 1.03)        | 0.060   | 122                          | 72           | 0.91 (0.56, 1.48)        | 0.698   |  |
| TCC-B                    | PFOS                      | Quartile 3       | 18.000-<25.000              | 248                          | 104          | 1.09 (0.73, 1.62)        | 0.687   | 119                          | 20           | 0.68 (0.34, 1.36)        | 0.277   | 129                          | 84           | 1.21 (0.75, 1.96)        | 0.431   |  |
| TCC-B                    | PFOS                      | Quartile 4       | >=25.000                    | 271                          | 101          | 0.97 (0.65, 1.45)        | 0.874   | 135                          | 18           | 0.64 (0.30, 1.39)        | 0.263   | 136                          | 83           | 1.10 (0.67, 1.78)        | 0.711   |  |
| TCC-B                    | PFOS                      | Continuous       |                             |                              |              | 1.02 (0.86, 1.21)        | 0.823   |                              |              | 0.83 (0.58, 1.18)        | 0.293   |                              |              | 1.06 (0.88, 1.29)        | 0.535   |  |
| <b>Bladder or Kidney</b> |                           |                  |                             |                              |              |                          |         |                              |              |                          |         |                              |              |                          |         |  |
| TCC-BK                   | PFHxS                     | Quartile 1       | <2.100                      | 277                          | 101          |                          |         | 157                          | 32           |                          |         | 120                          | 69           |                          |         |  |
| TCC-BK                   | PFHxS                     | Quartile 2       | 2.100-<3.200                | 227                          | 114          | 1.49 (1.01, 2.21)        | 0.045   | 122                          | 25           | 0.96 (0.51, 1.81)        | 0.904   | 105                          | 89           | 1.68 (1.00, 2.81)        | 0.050   |  |
| TCC-BK                   | PFHxS                     | Quartile 3       | 3.200-<5.000                | 229                          | 107          | 1.13 (0.77, 1.64)        | 0.539   | 93                           | 23           | 1.24 (0.65, 2.40)        | 0.514   | 136                          | 84           | 1.12 (0.70, 1.77)        | 0.641   |  |
| TCC-BK                   | PFHxS                     | Quartile 4       | >=5.000                     | 255                          | 110          | 1.15 (0.79, 1.66)        | 0.472   | 125                          | 22           | 0.79 (0.40, 1.55)        | 0.486   | 130                          | 88           | 1.22 (0.77, 1.94)        | 0.397   |  |
| TCC-BK                   | PFHxS                     | Continuous       |                             |                              |              | 0.98 (0.87, 1.11)        | 0.798   |                              |              | 0.89 (0.70, 1.13)        | 0.328   |                              |              | 0.99 (0.86, 1.15)        | 0.909   |  |
| TCC-BK                   | PFNA                      | Quartile 1       | <0.470                      | 220                          | 101          |                          |         | 117                          | 25           |                          |         | 103                          | 76           |                          |         |  |
| TCC-BK                   | PFNA                      | Quartile 2       | 0.470-<0.690                | 286                          | 114          | 0.84 (0.58, 1.22)        | 0.358   | 139                          | 30           | 0.92 (0.46, 1.85)        | 0.817   | 147                          | 84           | 0.85 (0.54, 1.33)        | 0.471   |  |
| TCC-BK                   | PFNA                      | Quartile 3       | 0.690-<1.000                | 243                          | 97           | 0.96 (0.65, 1.40)        | 0.821   | 126                          | 19           | 0.65 (0.32, 1.35)        | 0.253   | 117                          | 78           | 1.09 (0.69, 1.72)        | 0.721   |  |
| TCC-BK                   | PFNA                      | Quartile 4       | >=1.000                     | 239                          | 120          | 1.05 (0.72, 1.55)        | 0.791   | 115                          | 28           | 1.13 (0.57, 2.24)        | 0.734   | 124                          | 92           | 1.08 (0.67, 1.73)        | 0.761   |  |
| TCC-BK                   | PFNA                      | Continuous       |                             |                              |              | 0.98 (0.85, 1.12)        | 0.731   |                              |              | 0.93 (0.71, 1.22)        | 0.596   |                              |              | 1.00 (0.84, 1.18)        | 0.981   |  |
| TCC-BK                   | PFOA                      | Quartile 1       | <3.800                      | 222                          | 103          |                          |         | 127                          | 33           |                          |         | 95                           | 70           |                          |         |  |
| TCC-BK                   | PFOA                      | Quartile 2       | 3.800-<5.200                | 269                          | 109          | 0.82 (0.56, 1.20)        | 0.311   | 131                          | 29           | 0.88 (0.47, 1.66)        | 0.693   | 138                          | 80           | 0.82 (0.50, 1.33)        | 0.424   |  |
| TCC-BK                   | PFOA                      | Quartile 3       | 5.200-<6.700                | 211                          | 107          | 0.95 (0.64, 1.40)        | 0.780   | 95                           | 17           | 0.74 (0.34, 1.59)        | 0.436   | 116                          | 90           | 1.02 (0.63, 1.66)        | 0.943   |  |
| TCC-BK                   | PFOA                      | Quartile 4       | >=6.700                     | 286                          | 113          | 0.86 (0.59, 1.25)        | 0.435   | 144                          | 23           | 0.71 (0.35, 1.45)        | 0.347   | 142                          | 90           | 0.92 (0.57, 1.47)        | 0.715   |  |
| TCC-BK                   | PFOA                      | Continuous       |                             |                              |              | 0.95 (0.80, 1.14)        | 0.608   |                              |              | 0.93 (0.68, 1.28)        | 0.673   |                              |              | 0.95 (0.76, 1.19)        | 0.646   |  |
| TCC-BK                   | PFOS                      | Quartile 1       | <13.000                     | 217                          | 102          |                          |         | 113                          | 34           |                          |         | 104                          | 68           |                          |         |  |
| TCC-BK                   | PFOS                      | Quartile 2       | 13.000-<18.000              | 252                          | 101          | 0.83 (0.56, 1.22)        | 0.334   | 130                          | 20           | 0.45 (0.23, 0.88)        | 0.020   | 122                          | 81           | 1.00 (0.62, 1.62)        | 0.989   |  |
| TCC-BK                   | PFOS                      | Quartile 3       | 18.000-<25.000              | 248                          | 118          | 1.10 (0.75, 1.60)        | 0.635   | 119                          | 26           | 0.70 (0.38, 1.30)        | 0.259   | 129                          | 92           | 1.29 (0.81, 2.07)        | 0.285   |  |
| TCC-BK                   | PFOS                      | Quartile 4       | >=25.000                    | 271                          | 111          | 0.96 (0.65, 1.41)        | 0.835   | 135                          | 22           | 0.60 (0.29, 1.20)        | 0.148   | 136                          | 89           | 1.14 (0.71, 1.84)        | 0.589   |  |

| Cancer Type <sup>a</sup> | Type of PFAS <sup>b</sup> | Exposure Measure | Concentration Range (ng/ml) | Both Sexes                   |              |                          |         | Females                      |              |                          |         | Males                        |              |                          |         |
|--------------------------|---------------------------|------------------|-----------------------------|------------------------------|--------------|--------------------------|---------|------------------------------|--------------|--------------------------|---------|------------------------------|--------------|--------------------------|---------|
|                          |                           |                  |                             | Number in Model <sup>c</sup> |              | HR (95% CI) <sup>d</sup> | p-value | Number in Model <sup>e</sup> |              | HR (95% CI) <sup>d</sup> | p-value | Number in Model <sup>c</sup> |              | HR (95% CI) <sup>d</sup> | p-value |
|                          |                           |                  |                             | Sub-cohort                   | Cancer Cases |                          |         | Sub-cohort                   | Cancer Cases |                          |         | Sub-cohort                   | Cancer Cases |                          |         |
| TCC-BK<br>Kidney         | PFOS                      | Continuous       |                             |                              |              | 1.01 (0.86, 1.18)        | 0.936   |                              |              | 0.82 (0.60, 1.11)        | 0.201   |                              |              | 1.06 (0.88, 1.28)        | 0.544   |
| RCC                      | PFHxS                     | Quartile 1       | <2.000                      | 245                          | 26           |                          |         | 141                          | 11           |                          |         | 104                          | 15           |                          |         |
| RCC                      | PFHxS                     | Quartile 2       | 2.000-<2.900                | 207                          | 27           | 1.08 (0.58, 2.01)        | 0.811   | 110                          | 11           | 1.16 (0.44, 3.02)        | 0.763   | 97                           | 16           | 1.15 (0.46, 2.86)        | 0.761   |
| RCC                      | PFHxS                     | Quartile 3       | 2.900-<4.400                | 230                          | 26           | 0.99 (0.53, 1.85)        | 0.982   | 98                           | 6            | 0.95 (0.30, 2.98)        | 0.927   | 132                          | 20           | 1.15 (0.50, 2.65)        | 0.739   |
| RCC                      | PFHxS                     | Quartile 4       | >=4.400                     | 306                          | 28           | 0.81 (0.43, 1.52)        | 0.508   | 148                          | 14           | 1.17 (0.43, 3.16)        | 0.752   | 158                          | 14           | 0.65 (0.26, 1.60)        | 0.348   |
| RCC                      | PFHxS                     | Continuous       |                             |                              |              | 0.97 (0.80, 1.16)        | 0.717   |                              |              | 1.16 (0.80, 1.69)        | 0.426   |                              |              | 0.86 (0.69, 1.06)        | 0.160   |
| RCC                      | PFNA                      | Quartile 1       | <0.500                      | 253                          | 25           |                          |         | 128                          | 11           |                          |         | 125                          | 14           |                          |         |
| RCC                      | PFNA                      | Quartile 2       | 0.500-<0.670                | 234                          | 29           | 1.25 (0.67, 2.33)        | 0.478   | 117                          | 9            | 0.56 (0.17, 1.82)        | 0.333   | 117                          | 20           | 1.75 (0.77, 4.00)        | 0.184   |
| RCC                      | PFNA                      | Quartile 3       | 0.670-<1.000                | 262                          | 25           | 0.97 (0.52, 1.80)        | 0.915   | 137                          | 13           | 0.89 (0.31, 2.55)        | 0.834   | 125                          | 12           | 0.93 (0.39, 2.23)        | 0.869   |
| RCC                      | PFNA                      | Quartile 4       | >=1.000                     | 239                          | 28           | 1.27 (0.67, 2.42)        | 0.465   | 115                          | 9            | 0.72 (0.21, 2.50)        | 0.610   | 124                          | 19           | 2.02 (0.85, 4.81)        | 0.114   |
| RCC                      | PFNA                      | Continuous       |                             |                              |              | 1.06 (0.85, 1.32)        | 0.598   |                              |              | 0.90 (0.61, 1.33)        | 0.612   |                              |              | 1.21 (0.92, 1.59)        | 0.168   |
| RCC                      | PFOA                      | Quartile 1       | <3.900                      | 244                          | 27           |                          |         | 143                          | 8            |                          |         | 101                          | 19           |                          |         |
| RCC                      | PFOA                      | Quartile 2       | 3.900-<5.000                | 215                          | 25           | 1.00 (0.54, 1.87)        | 0.993   | 100                          | 8            | 1.33 (0.42, 4.19)        | 0.624   | 115                          | 17           | 0.79 (0.36, 1.74)        | 0.554   |
| RCC                      | PFOA                      | Quartile 3       | 5.000-<7.400                | 323                          | 28           | 0.74 (0.40, 1.36)        | 0.331   | 155                          | 13           | 1.66 (0.54, 5.12)        | 0.380   | 168                          | 15           | 0.45 (0.20, 1.01)        | 0.054   |
| RCC                      | PFOA                      | Quartile 4       | >=7.400                     | 206                          | 27           | 1.21 (0.65, 2.27)        | 0.545   | 99                           | 13           | 3.14 (1.04, 9.54)        | 0.043   | 107                          | 14           | 0.64 (0.28, 1.46)        | 0.293   |
| RCC                      | PFOA                      | Continuous       |                             |                              |              | 1.06 (0.83, 1.35)        | 0.648   |                              |              | 1.54 (1.05, 2.26)        | 0.027   |                              |              | 0.80 (0.57, 1.11)        | 0.178   |
| RCC                      | PFOS                      | Quartile 1       | <13.000                     | 217                          | 25           |                          |         | 113                          | 11           |                          |         | 104                          | 14           |                          |         |
| RCC                      | PFOS                      | Quartile 2       | 13.000-<19.000              | 291                          | 29           | 0.82 (0.45, 1.49)        | 0.508   | 143                          | 6            | 0.40 (0.12, 1.35)        | 0.139   | 148                          | 23           | 1.25 (0.57, 2.74)        | 0.579   |
| RCC                      | PFOS                      | Quartile 3       | 19.000-<26.000              | 236                          | 24           | 0.96 (0.51, 1.80)        | 0.892   | 121                          | 10           | 0.89 (0.32, 2.46)        | 0.819   | 115                          | 14           | 1.10 (0.46, 2.60)        | 0.836   |
| RCC                      | PFOS                      | Quartile 4       | >=26.000                    | 244                          | 29           | 1.13 (0.61, 2.07)        | 0.696   | 120                          | 15           | 1.29 (0.45, 3.74)        | 0.637   | 124                          | 14           | 0.98 (0.42, 2.29)        | 0.956   |
| RCC                      | PFOS                      | Continuous       |                             |                              |              | 1.08 (0.84, 1.38)        | 0.555   |                              |              | 1.30 (0.77, 2.20)        | 0.328   |                              |              | 0.97 (0.73, 1.29)        | 0.817   |
| <b>Hematologic</b>       |                           |                  |                             |                              |              |                          |         |                              |              |                          |         |                              |              |                          |         |
| MYELO                    | PFHxS                     | Quartile 1       | <1.900                      | 214                          | 17           |                          |         | 127                          | 7            |                          |         | 87                           | 10           |                          |         |
| MYELO                    | PFHxS                     | Quartile 2       | 1.900-<3.150                | 290                          | 23           | 0.98 (0.46, 2.05)        | 0.949   | 152                          | 11           | 1.36 (0.43, 4.24)        | 0.599   | 138                          | 12           | 0.85 (0.30, 2.43)        | 0.761   |
| MYELO                    | PFHxS                     | Quartile 3       | 3.150-<4.900                | 224                          | 19           | 0.93 (0.45, 1.93)        | 0.851   | 90                           | 4            | 0.77 (0.19, 3.04)        | 0.708   | 134                          | 15           | 0.94 (0.33, 2.64)        | 0.900   |
| MYELO                    | PFHxS                     | Quartile 4       | >=4.900                     | 260                          | 21           | 0.93 (0.44, 1.95)        | 0.840   | 128                          | 10           | 1.34 (0.37, 4.91)        | 0.658   | 132                          | 11           | 0.81 (0.29, 2.22)        | 0.679   |
| MYELO                    | PFHxS                     | Continuous       |                             |                              |              | 1.02 (0.80, 1.30)        | 0.882   |                              |              | 1.13 (0.74, 1.71)        | 0.571   |                              |              | 0.96 (0.68, 1.35)        | 0.803   |
| MYELO                    | PFNA                      | Quartile 1       | <0.455                      | 204                          | 20           |                          |         | 104                          | 11           |                          |         | 100                          | 9            |                          |         |
| MYELO                    | PFNA                      | Quartile 2       | 0.455-<0.690                | 302                          | 19           | 0.56 (0.28, 1.10)        | 0.090   | 152                          | 8            | 0.36 (0.12, 1.07)        | 0.066   | 150                          | 11           | 0.74 (0.28, 1.99)        | 0.554   |
| MYELO                    | PFNA                      | Quartile 3       | 0.690-<1.200                | 310                          | 20           | 0.59 (0.30, 1.19)        | 0.143   | 157                          | 8            | 0.32 (0.10, 1.04)        | 0.058   | 153                          | 12           | 0.88 (0.33, 2.36)        | 0.804   |
| MYELO                    | PFNA                      | Quartile 4       | >=1.200                     | 172                          | 21           | 1.11 (0.55, 2.27)        | 0.765   | 84                           | 5            | 0.41 (0.11, 1.54)        | 0.187   | 88                           | 16           | 2.30 (0.82, 6.47)        | 0.115   |
| MYELO                    | PFNA                      | Continuous       |                             |                              |              | 1.02 (0.76, 1.36)        | 0.905   |                              |              | 0.62 (0.39, 0.98)        | 0.043   |                              |              | 1.33 (0.95, 1.87)        | 0.093   |
| MYELO                    | PFOA                      | Quartile 1       | <3.500                      | 169                          | 19           |                          |         | 101                          | 11           |                          |         | 68                           | 8            |                          |         |
| MYELO                    | PFOA                      | Quartile 2       | 3.500-<4.600                | 216                          | 19           | 0.68 (0.33, 1.39)        | 0.286   | 110                          | 6            | 0.43 (0.13, 1.43)        | 0.169   | 106                          | 13           | 0.98 (0.36, 2.68)        | 0.963   |
| MYELO                    | PFOA                      | Quartile 3       | 4.600-<6.200                | 249                          | 21           | 0.68 (0.34, 1.36)        | 0.281   | 109                          | 10           | 0.68 (0.21, 2.13)        | 0.503   | 140                          | 11           | 0.73 (0.26, 2.06)        | 0.546   |
| MYELO                    | PFOA                      | Quartile 4       | >=6.200                     | 354                          | 21           | 0.51 (0.25, 1.03)        | 0.062   | 177                          | 5            | 0.17 (0.04, 0.76)        | 0.020   | 177                          | 16           | 0.83 (0.31, 2.25)        | 0.719   |
| MYELO                    | PFOA                      | Continuous       |                             |                              |              | 0.74 (0.54, 1.02)        | 0.063   |                              |              | 0.60 (0.39, 0.90)        | 0.013   |                              |              | 0.79 (0.45, 1.41)        | 0.431   |
| MYELO                    | PFOS                      | Quartile 1       | <12.000                     | 170                          | 16           |                          |         | 90                           | 8            |                          |         | 80                           | 8            |                          |         |
| MYELO                    | PFOS                      | Quartile 2       | 12.000-<18.000              | 299                          | 22           | 0.77 (0.37, 1.61)        | 0.487   | 153                          | 10           | 0.48 (0.13, 1.79)        | 0.275   | 146                          | 12           | 0.95 (0.34, 2.66)        | 0.921   |
| MYELO                    | PFOS                      | Quartile 3       | 18.000-<24.000              | 214                          | 21           | 1.13 (0.54, 2.38)        | 0.748   | 105                          | 9            | 0.84 (0.27, 2.67)        | 0.771   | 109                          | 12           | 1.39 (0.49, 3.97)        | 0.541   |
| MYELO                    | PFOS                      | Quartile 4       | >=24.000                    | 305                          | 21           | 0.85 (0.41, 1.77)        | 0.673   | 149                          | 5            | 0.30 (0.08, 1.09)        | 0.068   | 156                          | 16           | 1.57 (0.58, 4.26)        | 0.378   |
| MYELO                    | PFOS                      | Continuous       |                             |                              |              | 0.90 (0.67, 1.23)        | 0.514   |                              |              | 0.72 (0.49, 1.05)        | 0.084   |                              |              | 1.02 (0.63, 1.65)        | 0.929   |
| LYMPH                    | PFHxS                     | Quartile 1       | <2.000                      | 245                          | 124          |                          |         | 141                          | 72           |                          |         | 104                          | 52           |                          |         |
| LYMPH                    | PFHxS                     | Quartile 2       | 2.000-<3.000                | 223                          | 140          | 1.29 (0.93, 1.79)        | 0.127   | 118                          | 62           | 0.95 (0.60, 1.51)        | 0.839   | 105                          | 78           | 1.98 (1.17, 3.35)        | 0.011   |

| Cancer Type <sup>a</sup> | Type of PFAS <sup>b</sup> | Exposure Measure | Concentration Range (ng/ml) | Both Sexes                   |              |                          |         | Females                      |              |                          |         | Males                        |              |                          |         |
|--------------------------|---------------------------|------------------|-----------------------------|------------------------------|--------------|--------------------------|---------|------------------------------|--------------|--------------------------|---------|------------------------------|--------------|--------------------------|---------|
|                          |                           |                  |                             | Number in Model <sup>c</sup> |              | HR (95% CI) <sup>d</sup> | p-value | Number in Model <sup>c</sup> |              | HR (95% CI) <sup>d</sup> | p-value | Number in Model <sup>c</sup> |              | HR (95% CI) <sup>d</sup> | p-value |
|                          |                           |                  |                             | Sub-cohort                   | Cancer Cases |                          |         | Sub-cohort                   | Cancer Cases |                          |         | Sub-cohort                   | Cancer Cases |                          |         |
| LYMPH                    | PFHxS                     | Quartile 3       | 3.000-<5.200                | 274                          | 136          | 0.96 (0.70, 1.32)        | 0.805   | 119                          | 52           | 0.79 (0.49, 1.29)        | 0.348   | 155                          | 84           | 1.26 (0.78, 2.03)        | 0.338   |
| LYMPH                    | PFHxS                     | Quartile 4       | >=5.200                     | 246                          | 140          | 1.14 (0.82, 1.58)        | 0.440   | 119                          | 59           | 0.84 (0.52, 1.38)        | 0.501   | 127                          | 81           | 1.59 (0.97, 2.60)        | 0.063   |
| LYMPH                    | PFHxS                     | Continuous       |                             |                              |              | 1.04 (0.93, 1.15)        | 0.505   |                              |              | 0.97 (0.83, 1.14)        | 0.751   |                              |              | 1.07 (0.93, 1.25)        | 0.342   |
| LYMPH                    | PFNA                      | Quartile 1       | <0.450                      | 192                          | 131          |                          |         | 96                           | 57           |                          |         | 96                           | 74           |                          |         |
| LYMPH                    | PFNA                      | Quartile 2       | 0.450-<0.650                | 270                          | 139          | 0.73 (0.53, 1.01)        | 0.055   | 136                          | 68           | 0.72 (0.45, 1.16)        | 0.182   | 134                          | 71           | 0.70 (0.45, 1.11)        | 0.131   |
| LYMPH                    | PFNA                      | Quartile 3       | 0.650-<0.970                | 268                          | 132          | 0.73 (0.52, 1.01)        | 0.056   | 142                          | 57           | 0.54 (0.32, 0.89)        | 0.016   | 126                          | 75           | 0.85 (0.53, 1.34)        | 0.484   |
| LYMPH                    | PFNA                      | Quartile 4       | >=0.970                     | 258                          | 138          | 0.76 (0.55, 1.07)        | 0.115   | 123                          | 63           | 0.68 (0.39, 1.16)        | 0.153   | 135                          | 75           | 0.82 (0.51, 1.32)        | 0.417   |
| LYMPH                    | PFNA                      | Continuous       |                             |                              |              | 0.93 (0.82, 1.06)        | 0.292   |                              |              | 0.88 (0.73, 1.07)        | 0.209   |                              |              | 0.96 (0.81, 1.15)        | 0.684   |
| LYMPH                    | PFOA                      | Quartile 1       | <3.900                      | 244                          | 135          |                          |         | 143                          | 62           |                          |         | 101                          | 73           |                          |         |
| LYMPH                    | PFOA                      | Quartile 2       | 3.900-<5.000                | 215                          | 130          | 1.05 (0.75, 1.45)        | 0.782   | 100                          | 60           | 1.22 (0.75, 1.97)        | 0.422   | 115                          | 70           | 0.93 (0.58, 1.51)        | 0.776   |
| LYMPH                    | PFOA                      | Quartile 3       | 5.000-<6.700                | 243                          | 136          | 1.01 (0.73, 1.40)        | 0.943   | 110                          | 65           | 1.30 (0.79, 2.14)        | 0.303   | 133                          | 71           | 0.81 (0.51, 1.29)        | 0.373   |
| LYMPH                    | PFOA                      | Quartile 4       | >=6.700                     | 286                          | 139          | 0.88 (0.64, 1.22)        | 0.441   | 144                          | 58           | 0.83 (0.50, 1.37)        | 0.474   | 142                          | 81           | 0.87 (0.54, 1.38)        | 0.542   |
| LYMPH                    | PFOA                      | Continuous       |                             |                              |              | 0.96 (0.83, 1.11)        | 0.564   |                              |              | 0.94 (0.77, 1.13)        | 0.495   |                              |              | 0.95 (0.76, 1.20)        | 0.695   |
| LYMPH                    | PFOS                      | Quartile 1       | <13.000                     | 217                          | 132          |                          |         | 113                          | 66           |                          |         | 104                          | 66           |                          |         |
| LYMPH                    | PFOS                      | Quartile 2       | 13.000-<17.000              | 215                          | 120          | 0.89 (0.64, 1.25)        | 0.505   | 112                          | 61           | 0.81 (0.49, 1.33)        | 0.401   | 103                          | 59           | 0.93 (0.57, 1.52)        | 0.786   |
| LYMPH                    | PFOS                      | Quartile 3       | 17.000-<24.000              | 251                          | 143          | 0.97 (0.70, 1.33)        | 0.841   | 123                          | 56           | 0.73 (0.45, 1.18)        | 0.196   | 128                          | 87           | 1.22 (0.78, 1.90)        | 0.391   |
| LYMPH                    | PFOS                      | Quartile 4       | >=24.000                    | 305                          | 145          | 0.82 (0.60, 1.13)        | 0.227   | 149                          | 62           | 0.63 (0.39, 1.02)        | 0.063   | 156                          | 83           | 1.00 (0.64, 1.58)        | 0.986   |
| LYMPH                    | PFOS                      | Continuous       |                             |                              |              | 0.93 (0.82, 1.06)        | 0.265   |                              |              | 0.83 (0.69, 1.00)        | 0.049   |                              |              | 1.00 (0.83, 1.19)        | 0.956   |
| BNHL                     | PFHxS                     | Quartile 1       | <2.100                      | 277                          | 118          |                          |         | 157                          | 65           |                          |         | 120                          | 53           |                          |         |
| BNHL                     | PFHxS                     | Quartile 2       | 2.100-<3.000                | 191                          | 120          | 1.51 (1.08, 2.11)        | 0.017   | 102                          | 56           | 1.21 (0.75, 1.96)        | 0.440   | 89                           | 64           | 2.06 (1.21, 3.51)        | 0.008   |
| BNHL                     | PFHxS                     | Quartile 3       | 3.000-<5.100                | 271                          | 122          | 1.02 (0.73, 1.40)        | 0.927   | 117                          | 45           | 0.86 (0.52, 1.41)        | 0.545   | 154                          | 77           | 1.25 (0.78, 2.00)        | 0.349   |
| BNHL                     | PFHxS                     | Quartile 4       |                             | 249                          | 123          | 1.15 (0.83, 1.60)        | 0.401   | 121                          | 50           | 0.84 (0.50, 1.41)        | 0.510   | 128                          | 73           | 1.54 (0.95, 2.50)        | 0.080   |
| BNHL                     | PFHxS                     | Continuous       |                             |                              |              | 1.02 (0.92, 1.13)        | 0.729   |                              |              | 0.94 (0.80, 1.11)        | 0.481   |                              |              | 1.07 (0.91, 1.25)        | 0.420   |
| BNHL                     | PFNA                      | Quartile 1       | <0.450                      | 192                          | 119          |                          |         | 96                           | 51           |                          |         | 96                           | 68           |                          |         |
| BNHL                     | PFNA                      | Quartile 2       | 0.450-<0.630                | 244                          | 118          | 0.76 (0.54, 1.06)        | 0.102   | 124                          | 58           | 0.72 (0.44, 1.20)        | 0.208   | 120                          | 60           | 0.74 (0.46, 1.18)        | 0.207   |
| BNHL                     | PFNA                      | Quartile 3       | 0.630-<0.970                | 294                          | 124          | 0.67 (0.48, 0.94)        | 0.020   | 154                          | 54           | 0.50 (0.30, 0.85)        | 0.010   | 140                          | 70           | 0.74 (0.46, 1.17)        | 0.197   |
| BNHL                     | PFNA                      | Quartile 4       | >=0.970                     | 258                          | 122          | 0.74 (0.52, 1.04)        | 0.085   | 123                          | 53           | 0.60 (0.34, 1.06)        | 0.076   | 135                          | 69           | 0.83 (0.51, 1.34)        | 0.441   |
| BNHL                     | PFNA                      | Continuous       |                             |                              |              | 0.91 (0.80, 1.04)        | 0.164   |                              |              | 0.82 (0.67, 1.01)        | 0.058   |                              |              | 0.97 (0.80, 1.16)        | 0.703   |
| BNHL                     | PFOA                      | Quartile 1       | <3.800                      | 222                          | 108          |                          |         | 127                          | 52           |                          |         | 95                           | 56           |                          |         |
| BNHL                     | PFOA                      | Quartile 2       | 3.800-<5.000                | 237                          | 126          | 1.06 (0.75, 1.49)        | 0.745   | 116                          | 57           | 1.00 (0.60, 1.67)        | 0.995   | 121                          | 69           | 1.10 (0.67, 1.82)        | 0.699   |
| BNHL                     | PFOA                      | Quartile 3       | 5.000-<6.700                | 243                          | 128          | 1.08 (0.76, 1.52)        | 0.668   | 110                          | 60           | 1.20 (0.70, 2.04)        | 0.509   | 133                          | 68           | 0.97 (0.59, 1.58)        | 0.890   |
| BNHL                     | PFOA                      | Quartile 4       | >=6.700                     | 286                          | 121          | 0.87 (0.62, 1.23)        | 0.443   | 144                          | 47           | 0.66 (0.38, 1.15)        | 0.145   | 142                          | 74           | 1.00 (0.61, 1.63)        | 0.996   |
| BNHL                     | PFOA                      | Continuous       |                             |                              |              | 0.92 (0.80, 1.07)        | 0.280   |                              |              | 0.87 (0.71, 1.05)        | 0.147   |                              |              | 0.95 (0.75, 1.20)        | 0.658   |
| BNHL                     | PFOS                      | Quartile 1       | <13.000                     | 217                          | 120          |                          |         | 113                          | 60           |                          |         | 104                          | 60           |                          |         |
| BNHL                     | PFOS                      | Quartile 2       | 13.000-<17.000              | 215                          | 107          | 0.87 (0.61, 1.23)        | 0.425   | 112                          | 52           | 0.71 (0.42, 1.22)        | 0.218   | 103                          | 55           | 0.96 (0.58, 1.58)        | 0.860   |
| BNHL                     | PFOS                      | Quartile 3       | 17.000-<24.000              | 251                          | 129          | 0.95 (0.69, 1.32)        | 0.776   | 123                          | 52           | 0.71 (0.43, 1.18)        | 0.187   | 128                          | 77           | 1.18 (0.75, 1.87)        | 0.477   |
| BNHL                     | PFOS                      | Quartile 4       | >=24.000                    | 305                          | 127          | 0.78 (0.57, 1.09)        | 0.144   | 149                          | 52           | 0.55 (0.33, 0.93)        | 0.025   | 156                          | 75           | 0.99 (0.62, 1.58)        | 0.964   |
| BNHL                     | PFOS                      | Continuous       |                             |                              |              | 0.91 (0.80, 1.03)        | 0.124   |                              |              | 0.79 (0.65, 0.96)        | 0.016   |                              |              | 0.97 (0.81, 1.16)        | 0.733   |
| DLBCL                    | PFHxS                     | Quartile 1       | <2.100                      | 277                          | 27           |                          |         | 157                          | 18           |                          |         | 120                          | 9            |                          |         |
| DLBCL                    | PFHxS                     | Quartile 2       | 2.100-<2.900                | 175                          | 34           | 1.93 (1.07, 3.48)        | 0.029   | 94                           | 15           | 1.38 (0.58, 3.28)        | 0.472   | 81                           | 19           | 3.66 (1.33, 10.09)       | 0.012   |
| DLBCL                    | PFHxS                     | Quartile 3       | 2.900-<4.500                | 237                          | 31           | 1.27 (0.72, 2.25)        | 0.406   | 102                          | 10           | 0.89 (0.35, 2.26)        | 0.806   | 135                          | 21           | 2.36 (1.00, 5.61)        | 0.051   |
| DLBCL                    | PFHxS                     | Quartile 4       | >=4.500                     | 299                          | 31           | 1.01 (0.57, 1.81)        | 0.962   | 144                          | 12           | 0.64 (0.24, 1.65)        | 0.353   | 155                          | 19           | 1.80 (0.72, 4.50)        | 0.208   |
| DLBCL                    | PFHxS                     | Continuous       |                             |                              |              | 0.95 (0.80, 1.12)        | 0.535   |                              |              | 0.88 (0.64, 1.20)        | 0.413   |                              |              | 1.00 (0.81, 1.24)        | 0.985   |
| DLBCL                    | PFNA                      | Quartile 1       | <0.430                      | 168                          | 30           |                          |         | 84                           | 13           |                          |         | 84                           | 17           |                          |         |
| DLBCL                    | PFNA                      | Quartile 2       | 0.430-<0.610                | 237                          | 29           | 0.78 (0.44, 1.40)        | 0.410   | 117                          | 11           | 0.68 (0.26, 1.72)        | 0.411   | 120                          | 18           | 0.83 (0.37, 1.85)        | 0.654   |



| Cancer Type <sup>a</sup> | Type of PFAS <sup>b</sup> | Exposure Measure | Concentration Range (ng/ml) | Both Sexes                   |              |                          |         | Females                      |              |                          |         | Males                        |              |                          |         |
|--------------------------|---------------------------|------------------|-----------------------------|------------------------------|--------------|--------------------------|---------|------------------------------|--------------|--------------------------|---------|------------------------------|--------------|--------------------------|---------|
|                          |                           |                  |                             | Number in Model <sup>c</sup> |              | HR (95% CI) <sup>d</sup> | p-value | Number in Model <sup>e</sup> |              | HR (95% CI) <sup>d</sup> | p-value | Number in Model <sup>c</sup> |              | HR (95% CI) <sup>d</sup> | p-value |
|                          |                           |                  |                             | Sub-cohort                   | Cancer Cases |                          |         | Sub-cohort                   | Cancer Cases |                          |         | Sub-cohort                   | Cancer Cases |                          |         |
| DLBCL                    | PFNA                      | Quartile 3       | 0.610-<0.960                | 318                          | 33           | 0.66 (0.38, 1.13)        | 0.129   | 169                          | 18           | 0.67 (0.28, 1.61)        | 0.368   | 149                          | 15           | 0.59 (0.26, 1.34)        | 0.207   |
| DLBCL                    | PFNA                      | Quartile 4       | >=0.960                     | 265                          | 31           | 0.70 (0.39, 1.25)        | 0.227   | 127                          | 13           | 0.76 (0.28, 2.10)        | 0.599   | 138                          | 18           | 0.69 (0.30, 1.58)        | 0.382   |
| DLBCL                    | PFNA                      | Continuous       |                             |                              |              | 0.86 (0.70, 1.05)        | 0.144   |                              |              | 0.89 (0.64, 1.26)        | 0.519   |                              |              | 0.83 (0.62, 1.12)        | 0.221   |
| DLBCL                    | PFOA                      | Quartile 1       | <3.800                      | 222                          | 28           |                          |         | 127                          | 11           |                          |         | 95                           | 17           |                          |         |
| DLBCL                    | PFOA                      | Quartile 2       | 3.800-<5.000                | 237                          | 33           | 1.07 (0.59, 1.96)        | 0.815   | 116                          | 15           | 1.27 (0.47, 3.44)        | 0.634   | 121                          | 18           | 0.99 (0.42, 2.35)        | 0.990   |
| DLBCL                    | PFOA                      | Quartile 3       | 5.000-<6.300                | 191                          | 31           | 1.29 (0.70, 2.37)        | 0.408   | 83                           | 15           | 2.03 (0.72, 5.75)        | 0.180   | 108                          | 16           | 0.94 (0.41, 2.15)        | 0.884   |
| DLBCL                    | PFOA                      | Quartile 4       | >=6.300                     | 338                          | 31           | 0.74 (0.41, 1.34)        | 0.325   | 171                          | 14           | 0.92 (0.34, 2.47)        | 0.864   | 167                          | 17           | 0.68 (0.30, 1.53)        | 0.346   |
| DLBCL                    | PFOA                      | Continuous       |                             |                              |              | 0.86 (0.71, 1.05)        | 0.142   |                              |              | 0.94 (0.69, 1.29)        | 0.713   |                              |              | 0.80 (0.58, 1.10)        | 0.166   |
| DLBCL                    | PFOS                      | Quartile 1       | <13.000                     | 217                          | 29           |                          |         | 113                          | 13           |                          |         | 104                          | 16           |                          |         |
| DLBCL                    | PFOS                      | Quartile 2       | 13.000-<17.000              | 215                          | 30           | 1.03 (0.57, 1.85)        | 0.919   | 112                          | 20           | 1.45 (0.53, 3.97)        | 0.476   | 103                          | 10           | 0.69 (0.28, 1.68)        | 0.414   |
| DLBCL                    | PFOS                      | Quartile 3       | 17.000-<24.000              | 251                          | 27           | 0.84 (0.47, 1.51)        | 0.561   | 123                          | 8            | 0.57 (0.18, 1.79)        | 0.335   | 128                          | 19           | 1.16 (0.55, 2.45)        | 0.691   |
| DLBCL                    | PFOS                      | Quartile 4       | >=24.000                    | 305                          | 37           | 0.96 (0.56, 1.66)        | 0.884   | 149                          | 14           | 0.75 (0.28, 2.02)        | 0.573   | 156                          | 23           | 1.24 (0.59, 2.62)        | 0.569   |
| DLBCL                    | PFOS                      | Continuous       |                             |                              |              | 0.90 (0.74, 1.10)        | 0.304   |                              |              | 0.77 (0.56, 1.06)        | 0.114   |                              |              | 1.03 (0.78, 1.36)        | 0.853   |
| CLL/SLL                  | PFHxS                     | Quartile 1       | <2.000                      | 245                          | 32           |                          |         | 141                          | 22           |                          |         | 104                          | 10           |                          |         |
| CLL/SLL                  | PFHxS                     | Quartile 2       | 2.000-<3.200                | 259                          | 35           | 1.07 (0.62, 1.84)        | 0.806   | 138                          | 17           | 0.72 (0.34, 1.53)        | 0.393   | 121                          | 18           | 2.10 (0.83, 5.36)        | 0.119   |
| CLL/SLL                  | PFHxS                     | Quartile 3       | 3.200-<6.200                | 302                          | 37           | 0.95 (0.55, 1.64)        | 0.848   | 130                          | 12           | 0.53 (0.22, 1.26)        | 0.151   | 172                          | 25           | 1.85 (0.75, 4.56)        | 0.184   |
| CLL/SLL                  | PFHxS                     | Quartile 4       | >=6.200                     | 182                          | 36           | 1.55 (0.89, 2.71)        | 0.125   | 88                           | 15           | 0.91 (0.36, 2.32)        | 0.848   | 94                           | 21           | 3.01 (1.21, 7.48)        | 0.018   |
| CLL/SLL                  | PFHxS                     | Continuous       |                             |                              |              | 1.11 (0.93, 1.31)        | 0.243   |                              |              | 0.89 (0.69, 1.16)        | 0.398   |                              |              | 1.34 (1.02, 1.75)        | 0.033   |
| CLL/SLL                  | PFNA                      | Quartile 1       | <0.460                      | 204                          | 35           |                          |         | 104                          | 19           |                          |         | 100                          | 16           |                          |         |
| CLL/SLL                  | PFNA                      | Quartile 2       | 0.460-<0.660                | 270                          | 35           | 0.67 (0.39, 1.13)        | 0.134   | 136                          | 18           | 0.47 (0.21, 1.05)        | 0.065   | 134                          | 17           | 0.76 (0.35, 1.65)        | 0.490   |
| CLL/SLL                  | PFNA                      | Quartile 3       | 0.660-<1.000                | 275                          | 33           | 0.62 (0.36, 1.08)        | 0.092   | 142                          | 15           | 0.33 (0.14, 0.79)        | 0.013   | 133                          | 18           | 0.89 (0.40, 1.97)        | 0.774   |
| CLL/SLL                  | PFNA                      | Quartile 4       | >=1.000                     | 239                          | 37           | 0.84 (0.47, 1.49)        | 0.546   | 115                          | 14           | 0.40 (0.15, 1.06)        | 0.065   | 124                          | 23           | 1.34 (0.58, 3.10)        | 0.490   |
| CLL/SLL                  | PFNA                      | Continuous       |                             |                              |              | 0.95 (0.75, 1.20)        | 0.644   |                              |              | 0.73 (0.53, 1.02)        | 0.062   |                              |              | 1.13 (0.82, 1.56)        | 0.441   |
| CLL/SLL                  | PFOA                      | Quartile 1       | <4.000                      | 264                          | 34           |                          |         | 152                          | 19           |                          |         | 112                          | 15           |                          |         |
| CLL/SLL                  | PFOA                      | Quartile 2       | 4.000-<5.600                | 295                          | 36           | 0.93 (0.55, 1.59)        | 0.791   | 134                          | 22           | 1.32 (0.62, 2.81)        | 0.472   | 161                          | 14           | 0.66 (0.28, 1.57)        | 0.346   |
| CLL/SLL                  | PFOA                      | Quartile 3       | 5.600-<7.300                | 217                          | 31           | 1.08 (0.60, 1.95)        | 0.785   | 108                          | 10           | 0.64 (0.24, 1.70)        | 0.369   | 109                          | 21           | 1.67 (0.70, 3.97)        | 0.244   |
| CLL/SLL                  | PFOA                      | Quartile 4       | >=7.300                     | 212                          | 39           | 1.40 (0.82, 2.41)        | 0.221   | 103                          | 15           | 0.97 (0.39, 2.41)        | 0.943   | 109                          | 24           | 1.71 (0.76, 3.82)        | 0.194   |
| CLL/SLL                  | PFOA                      | Continuous       |                             |                              |              | 1.03 (0.82, 1.29)        | 0.797   |                              |              | 0.83 (0.62, 1.10)        | 0.192   |                              |              | 1.29 (0.89, 1.89)        | 0.183   |
| CLL/SLL                  | PFOS                      | Quartile 1       | <13.000                     | 217                          | 31           |                          |         | 113                          | 16           |                          |         | 104                          | 15           |                          |         |
| CLL/SLL                  | PFOS                      | Quartile 2       | 13.000-<19.000              | 291                          | 38           | 0.82 (0.48, 1.42)        | 0.485   | 143                          | 20           | 0.70 (0.30, 1.62)        | 0.402   | 148                          | 18           | 0.85 (0.38, 1.87)        | 0.680   |
| CLL/SLL                  | PFOS                      | Quartile 3       | 19.000-<25.000              | 209                          | 34           | 1.18 (0.68, 2.07)        | 0.557   | 106                          | 17           | 1.08 (0.49, 2.39)        | 0.856   | 103                          | 17           | 1.35 (0.59, 3.05)        | 0.477   |
| CLL/SLL                  | PFOS                      | Quartile 4       | >=25.000                    | 271                          | 37           | 0.96 (0.55, 1.66)        | 0.875   | 135                          | 13           | 0.45 (0.17, 1.16)        | 0.099   | 136                          | 24           | 1.48 (0.67, 3.26)        | 0.330   |
| CLL/SLL                  | PFOS                      | Continuous       |                             |                              |              | 1.00 (0.81, 1.24)        | 0.999   |                              |              | 0.78 (0.59, 1.04)        | 0.096   |                              |              | 1.17 (0.84, 1.63)        | 0.342   |
| MM                       | PFHxS                     | Quartile 1       | <2.000                      | 245                          | 24           |                          |         | 141                          | 8            |                          |         | 104                          | 16           |                          |         |
| MM                       | PFHxS                     | Quartile 2       | 2.000-<3.100                | 245                          | 24           | 1.08 (0.58, 2.00)        | 0.813   | 131                          | 10           | 1.23 (0.44, 3.37)        | 0.694   | 114                          | 14           | 1.08 (0.43, 2.69)        | 0.873   |
| MM                       | PFHxS                     | Quartile 3       | 3.100-<5.000                | 243                          | 25           | 1.02 (0.55, 1.90)        | 0.951   | 100                          | 13           | 2.11 (0.83, 5.36)        | 0.115   | 143                          | 12           | 0.58 (0.26, 1.31)        | 0.191   |
| MM                       | PFHxS                     | Quartile 4       | >=5.000                     | 255                          | 26           | 1.07 (0.58, 1.98)        | 0.831   | 125                          | 12           | 1.51 (0.57, 4.01)        | 0.409   | 130                          | 14           | 0.82 (0.34, 1.96)        | 0.654   |
| MM                       | PFHxS                     | Continuous       |                             |                              |              | 0.97 (0.77, 1.21)        | 0.772   |                              |              | 1.16 (0.83, 1.64)        | 0.388   |                              |              | 0.82 (0.61, 1.12)        | 0.209   |
| MM                       | PFNA                      | Quartile 1       | <0.460                      | 204                          | 25           |                          |         | 104                          | 7            |                          |         | 100                          | 18           |                          |         |
| MM                       | PFNA                      | Quartile 2       | 0.460-<0.590                | 171                          | 25           | 1.24 (0.68, 2.25)        | 0.486   | 82                           | 12           | 1.95 (0.71, 5.37)        | 0.196   | 89                           | 13           | 1.12 (0.46, 2.71)        | 0.802   |
| MM                       | PFNA                      | Quartile 3       | 0.590-<0.920                | 312                          | 23           | 0.60 (0.33, 1.11)        | 0.106   | 160                          | 12           | 0.88 (0.30, 2.52)        | 0.805   | 152                          | 11           | 0.44 (0.19, 1.03)        | 0.060   |
| MM                       | PFNA                      | Quartile 4       | >=0.920                     | 301                          | 26           | 0.70 (0.38, 1.28)        | 0.244   | 151                          | 12           | 0.86 (0.29, 2.56)        | 0.788   | 150                          | 14           | 0.69 (0.28, 1.66)        | 0.403   |
| MM                       | PFNA                      | Continuous       |                             |                              |              | 0.81 (0.66, 0.99)        | 0.039   |                              |              | 0.81 (0.59, 1.12)        | 0.199   |                              |              | 0.76 (0.56, 1.05)        | 0.096   |
| MM                       | PFOA                      | Quartile 1       | <3.700                      | 206                          | 25           |                          |         | 118                          | 10           |                          |         | 88                           | 15           |                          |         |
| MM                       | PFOA                      | Quartile 2       | 3.700-<4.800                | 220                          | 21           | 0.73 (0.39, 1.38)        | 0.337   | 110                          | 9            | 0.78 (0.26, 2.31)        | 0.650   | 110                          | 12           | 0.71 (0.29, 1.76)        | 0.458   |

| Cancer Type <sup>a</sup> | Type of PFAS <sup>b</sup> | Exposure Measure | Concentration Range (ng/ml) | Both Sexes                   |              |                          |         | Females                      |              |                          |         | Males                        |              |                          |         |
|--------------------------|---------------------------|------------------|-----------------------------|------------------------------|--------------|--------------------------|---------|------------------------------|--------------|--------------------------|---------|------------------------------|--------------|--------------------------|---------|
|                          |                           |                  |                             | Number in Model <sup>c</sup> |              | HR (95% CI) <sup>d</sup> | p-value | Number in Model <sup>c</sup> |              | HR (95% CI) <sup>d</sup> | p-value | Number in Model <sup>c</sup> |              | HR (95% CI) <sup>d</sup> | p-value |
|                          |                           |                  |                             | Sub-cohort                   | Cancer Cases |                          |         | Sub-cohort                   | Cancer Cases |                          |         | Sub-cohort                   | Cancer Cases |                          |         |
| MM                       | PFOA                      | Quartile 3       | 4.800-<5.800                | 164                          | 28           | 1.33 (0.72, 2.43)        | 0.364   | 75                           | 13           | 1.59 (0.56, 4.54)        | 0.384   | 89                           | 15           | 1.07 (0.46, 2.48)        | 0.883   |
| MM                       | PFOA                      | Quartile 4       | >=5.800                     | 398                          | 25           | 0.54 (0.28, 1.02)        | 0.059   | 194                          | 11           | 0.60 (0.21, 1.69)        | 0.335   | 204                          | 14           | 0.46 (0.19, 1.16)        | 0.102   |
| MM                       | PFOA                      | Continuous       |                             |                              |              | 0.75 (0.58, 0.97)        | 0.028   |                              |              | 0.80 (0.55, 1.16)        | 0.233   |                              |              | 0.64 (0.41, 0.99)        | 0.046   |
| MM                       | PFOS                      | Quartile 1       | <11.000                     | 140                          | 20           |                          |         | 74                           | 9            |                          |         | 66                           | 11           |                          |         |
| MM                       | PFOS                      | Quartile 2       | 11.000-<16.000              | 228                          | 27           | 0.79 (0.42, 1.49)        | 0.471   | 122                          | 13           | 0.71 (0.27, 1.90)        | 0.494   | 106                          | 14           | 0.85 (0.36, 2.04)        | 0.723   |
| MM                       | PFOS                      | Quartile 3       | 16.000-<20.000              | 179                          | 24           | 0.92 (0.48, 1.77)        | 0.803   | 79                           | 7            | 0.59 (0.18, 1.96)        | 0.391   | 100                          | 17           | 1.10 (0.47, 2.59)        | 0.820   |
| MM                       | PFOS                      | Quartile 4       | >=20.000                    | 441                          | 28           | 0.46 (0.25, 0.85)        | 0.014   | 222                          | 14           | 0.42 (0.16, 1.14)        | 0.088   | 219                          | 14           | 0.43 (0.18, 1.04)        | 0.060   |
| MM                       | PFOS                      | Continuous       |                             |                              |              | 0.74 (0.61, 0.90)        | 0.002   |                              |              | 0.69 (0.49, 0.98)        | 0.036   |                              |              | 0.71 (0.54, 0.95)        | 0.020   |

<sup>a</sup>TCC-B=transitional cell carcinoma of the bladder, TCC-BK=transitional cell carcinoma of the bladder or kidney, RCC=Renal cell carcinoma/adenocarcinoma, MYELO=myeloid malignancies, LYMPH=lymphoid malignancies, BNHL=B-cell non-Hodgkin leukemia/lymphoma, DLBCL=diffuse large B-cell lymphoma, CLL/SLL=chronic lymphocytic leukemia/small lymphocytic lymphoma/mantle cell lymphoma, MM=multiple myeloma

<sup>b</sup>PFHxS=perfluorohexane sulfonic acid, PFNA=perfluorononanoic acid, PFOA=perfluorooctanoic acid, PFOS=perfluorooctane sulfonate

<sup>c</sup>All models had separate baseline hazards by sex or were restricted to one sex. The primary models controlled for year of serum sample collection (single-year categories), age at serum collection (<60, 60–64, 65–69, 70–74, 75–79, ≥80 years), race (non-Hispanic white, other), education (high school graduate or less, vocational/trade school or some college, college graduate, graduate school), smoking status (current smoker, former smoker, ever smoked but unknown if current or former, never smoked), and alcohol consumption (non-drinker, <1 drink/week, 1–6 drinks/week, 1 drink/day, ≥2 drinks/day).

<sup>d</sup>HR=hazard ratio, CI=confidence interval

Table S11. Ratio of the number of cases to the number of parameters in various models, Case-cohort study of association between PFAS and selected cancers among participants in the Cancer Prevention II LifeLink cohort, 1998-2015

| Cancer type <sup>a</sup> | Case counts |       |      | Ratio of cases to parameters in primary models with log2 PFAS (20 parameters) |       |      | Ratio of cases to parameters in primary models with PFAS quartiles (22 parameters) |       |      | Ratio of cases to parameters in collapsed models with log2 PFAS (13 parameters) |       |       | Ratio of cases to parameters in collapsed models with PFAS quartiles (15 parameters) |       |       |
|--------------------------|-------------|-------|------|-------------------------------------------------------------------------------|-------|------|------------------------------------------------------------------------------------|-------|------|---------------------------------------------------------------------------------|-------|-------|--------------------------------------------------------------------------------------|-------|-------|
|                          | Both        | Women | Men  | Both                                                                          | Women | Men  | Both                                                                               | Women | Men  | Both                                                                            | Women | Men   | Both                                                                                 | Women | Men   |
| <b>Kidney</b>            | 156         | 65    | 91   | 7.8                                                                           | 3.3   | 4.6  | 7.1                                                                                | 3.0   | 4.1  | 12.0                                                                            | 5.0   | 7.0   | 10.4                                                                                 | 4.3   | 6.1   |
| RCC                      | 107         | 42    | 65   | 5.4                                                                           | 2.1   | 3.3  | 4.9                                                                                | 1.9   | 3.0  | 8.2                                                                             | 3.2   | 5.0   | 7.1                                                                                  | 2.8   | 4.3   |
| <b>Bladder</b>           | 396         | 82    | 314  | 19.8                                                                          | 4.1   | 15.7 | 18.0                                                                               | 3.7   | 14.3 | 30.5                                                                            | 6.3   | 24.2  | 26.4                                                                                 | 5.5   | 20.9  |
| TCC-B                    | 385         | 80    | 305  | 19.3                                                                          | 4.0   | 15.3 | 17.5                                                                               | 3.6   | 13.9 | 29.6                                                                            | 6.2   | 23.5  | 25.7                                                                                 | 5.3   | 20.3  |
| TCC-BK                   | 432         | 102   | 330  | 21.6                                                                          | 5.1   | 16.5 | 19.6                                                                               | 4.6   | 15.0 | 33.2                                                                            | 7.8   | 25.4  | 28.8                                                                                 | 6.8   | 22.0  |
| <b>Breast</b>            |             | 780   |      |                                                                               | 39.0  |      |                                                                                    | 35.5  |      |                                                                                 | 60.0  |       |                                                                                      | 52.0  |       |
| <b>Prostate</b>          |             |       | 1599 |                                                                               |       | 80.0 |                                                                                    |       | 72.7 |                                                                                 |       | 123.0 |                                                                                      |       | 106.6 |
| <b>Pancreas</b>          | 171         | 81    | 90   | 8.6                                                                           | 4.1   | 4.5  | 7.8                                                                                | 3.7   | 4.1  | 13.2                                                                            | 6.2   | 6.9   | 11.4                                                                                 | 5.4   | 6.0   |
| <b>Heme</b>              | 626         | 281   | 345  | 31.3                                                                          | 14.1  | 17.3 | 28.5                                                                               | 12.8  | 15.7 | 48.2                                                                            | 21.6  | 26.5  | 41.7                                                                                 | 18.7  | 23.0  |
| MYELO                    | 80          | 32    | 48   | 4.0                                                                           | 1.6   | 2.4  | 3.6                                                                                | 1.5   | 2.2  | 6.2                                                                             | 2.5   | 3.7   | 5.3                                                                                  | 2.1   | 3.2   |
| LYMPH                    | 540         | 245   | 295  | 27.0                                                                          | 12.3  | 14.8 | 24.5                                                                               | 11.1  | 13.4 | 41.5                                                                            | 18.8  | 22.7  | 36.0                                                                                 | 16.3  | 19.7  |
| B-NHL                    | 483         | 216   | 267  | 24.2                                                                          | 10.8  | 13.4 | 22.0                                                                               | 9.8   | 12.1 | 37.2                                                                            | 16.6  | 20.5  | 32.2                                                                                 | 14.4  | 17.8  |
| DLBCL                    | 123         | 55    | 68   | 6.2                                                                           | 2.8   | 3.4  | 5.6                                                                                | 2.5   | 3.1  | 9.5                                                                             | 4.2   | 5.2   | 8.2                                                                                  | 3.7   | 4.5   |
| CLL/SLL                  | 140         | 66    | 74   | 7.0                                                                           | 3.3   | 3.7  | 6.4                                                                                | 3.0   | 3.4  | 10.8                                                                            | 5.1   | 5.7   | 9.3                                                                                  | 4.4   | 4.9   |
| MM                       | 99          | 43    | 56   | 5.0                                                                           | 2.2   | 2.8  | 4.5                                                                                | 2.0   | 2.5  | 7.6                                                                             | 3.3   | 4.3   | 6.6                                                                                  | 2.9   | 3.7   |

<sup>a</sup> TCC-B=transitional cell carcinoma of the bladder, TCC-BK=transitional cell carcinoma of the bladder or kidney, RCC=Renal cell carcinoma/adenocarcinoma, MYELO=myeloid malignancies, LYMPH=lymphoid malignancies, BNHL=B-cell non-Hodgkin leukemia/lymphoma, DLBCL=diffuse large B-cell lymphoma, CLL/SLL=chronic lymphocytic leukemia/small lymphocytic lymphoma/mantle cell lymphoma, MM=multiple myeloma

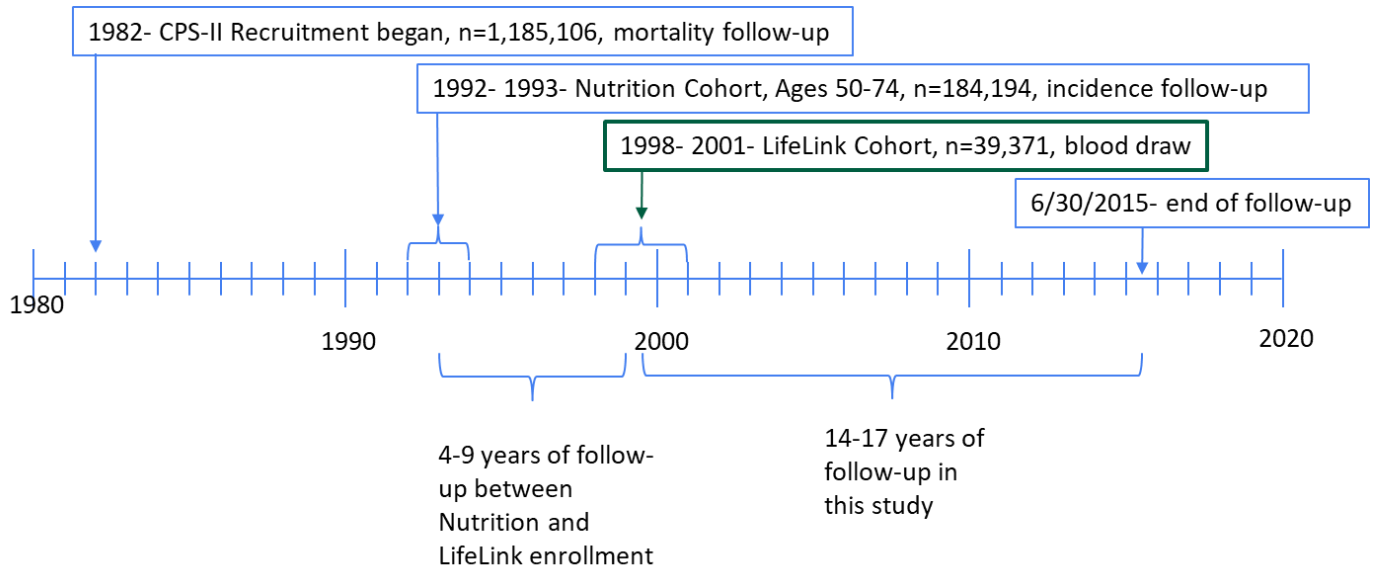

Figure S1. Timeline of study participant recruitment, Case-cohort study of association between PFAS and selected cancers among participants in the Cancer Prevention II LifeLink cohort, 1998-2015

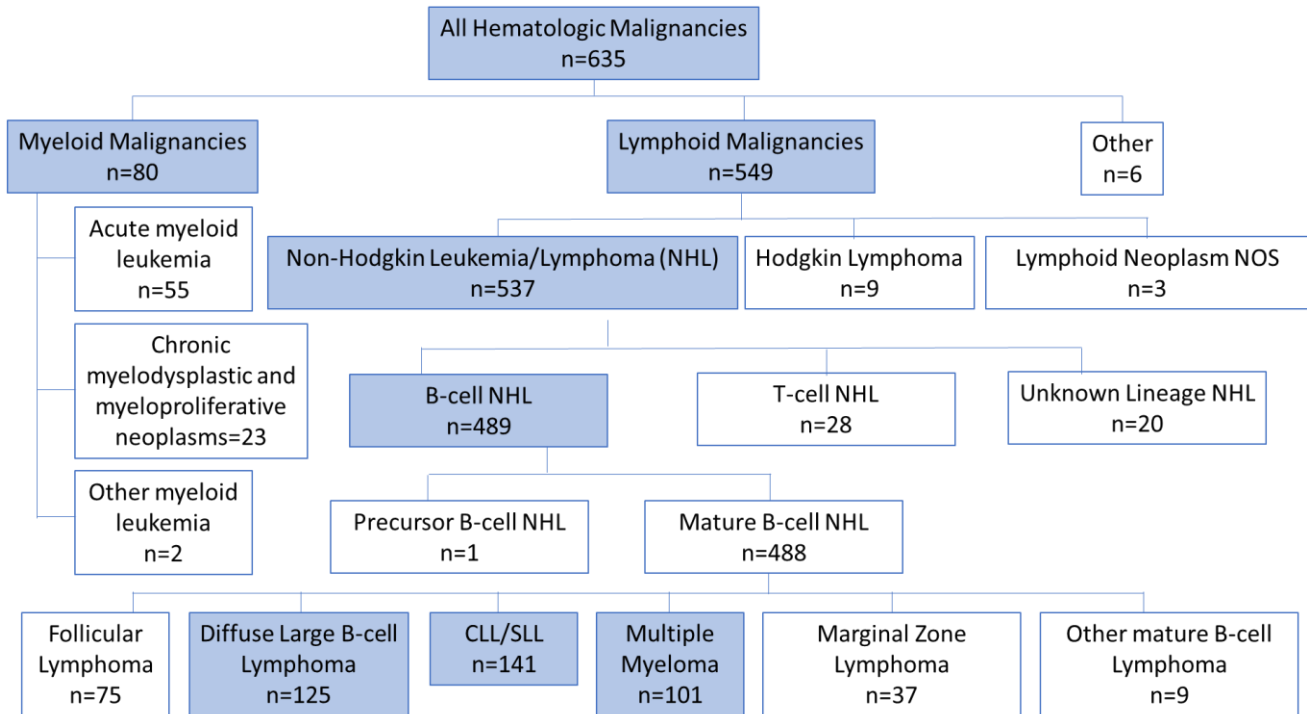

Figure S2. Hematologic sub-groups considered, Case-cohort study of association between PFAS and selected cancers among participants in the Cancer Prevention II LifeLink cohort, 1998-2015. NHL=Non-Hodgkin Leukemia/Lymphoma, CLL/SLL= chronic lymphocytic leukemia/small lymphocytic lymphoma/mantle cell lymphoma.

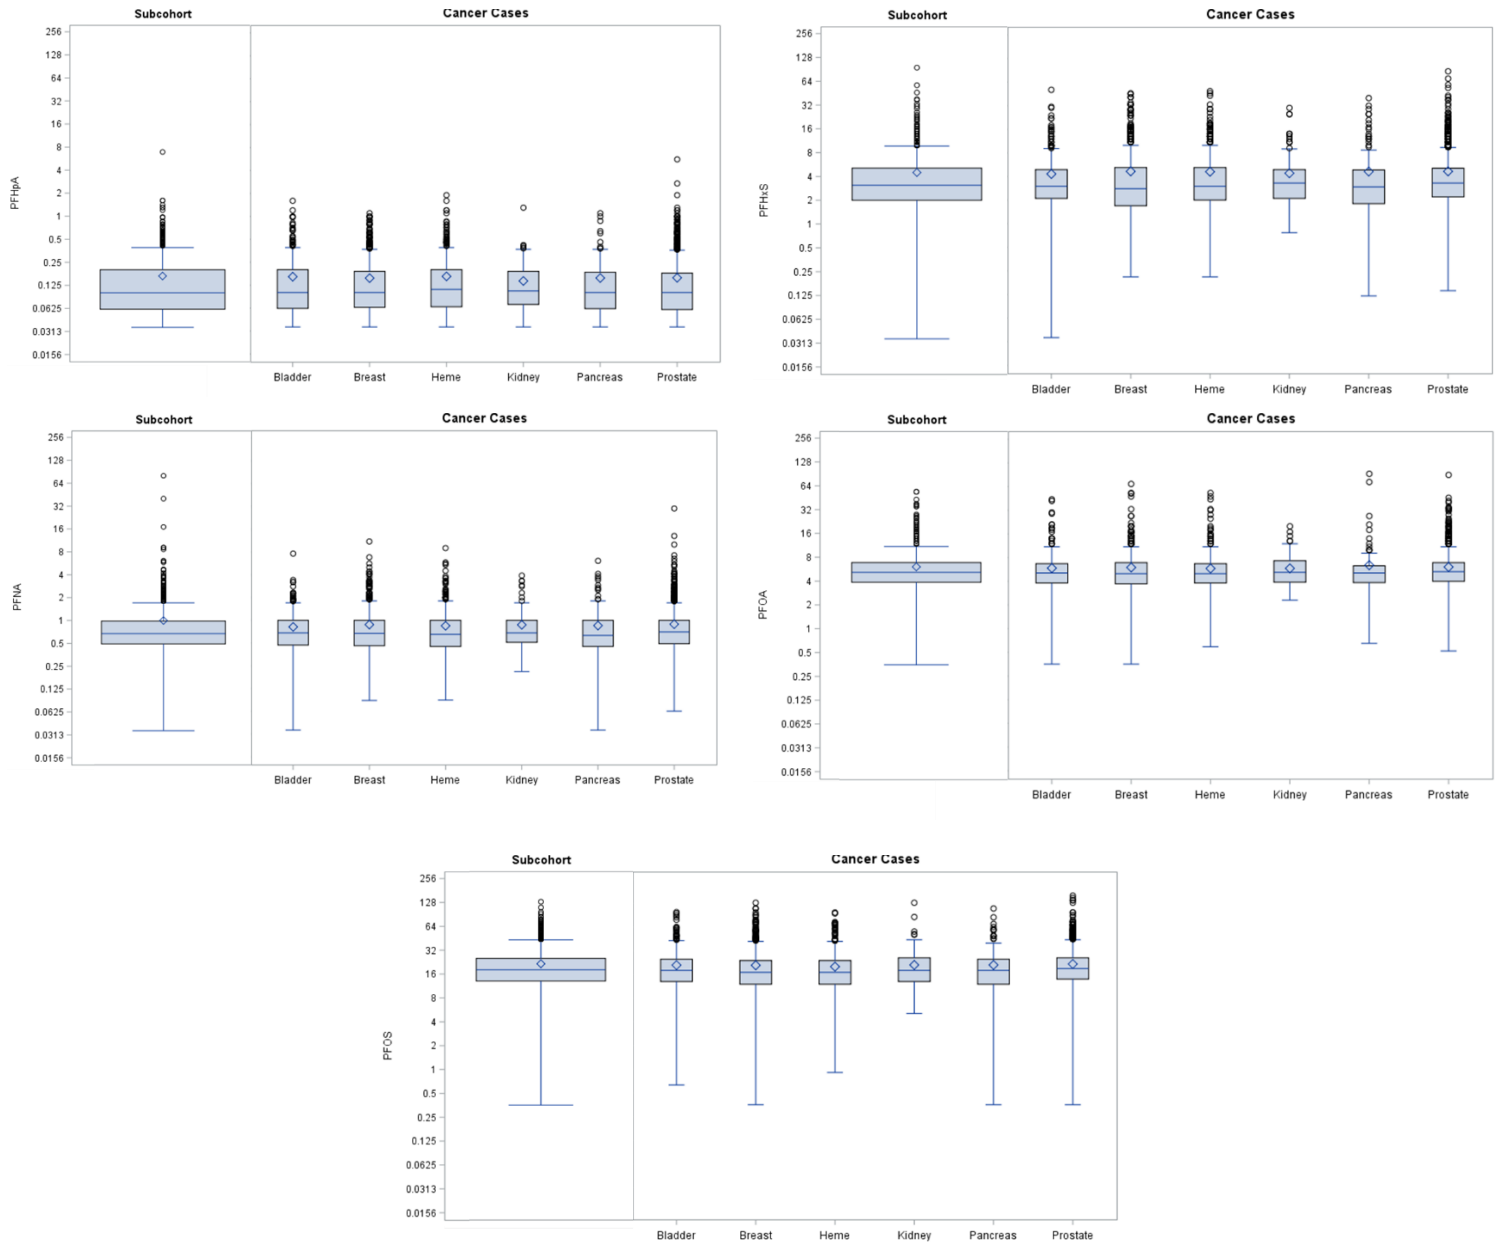

Figure S3. Box plots of PFAS serum concentrations among subcohort participants and participants with incident cancers (ng/ml), Case-cohort study of association between PFAS and selected cancers among participants in the Cancer Prevention II LifeLink cohort, 1998-2015. Values below the limit of detection were imputed as the limit of detection divided by the square root of 2, values are displayed on a log<sub>2</sub> scale. Heme=hematologic malignancies, PFHpA=perfluoroheptanoic acid, PFHxS=perfluorohexane sulfonic acid, PFNA=perfluorononanoic acid, PFOA=perfluorooctanoic acid, PFOS=perfluorooctane sulfonate

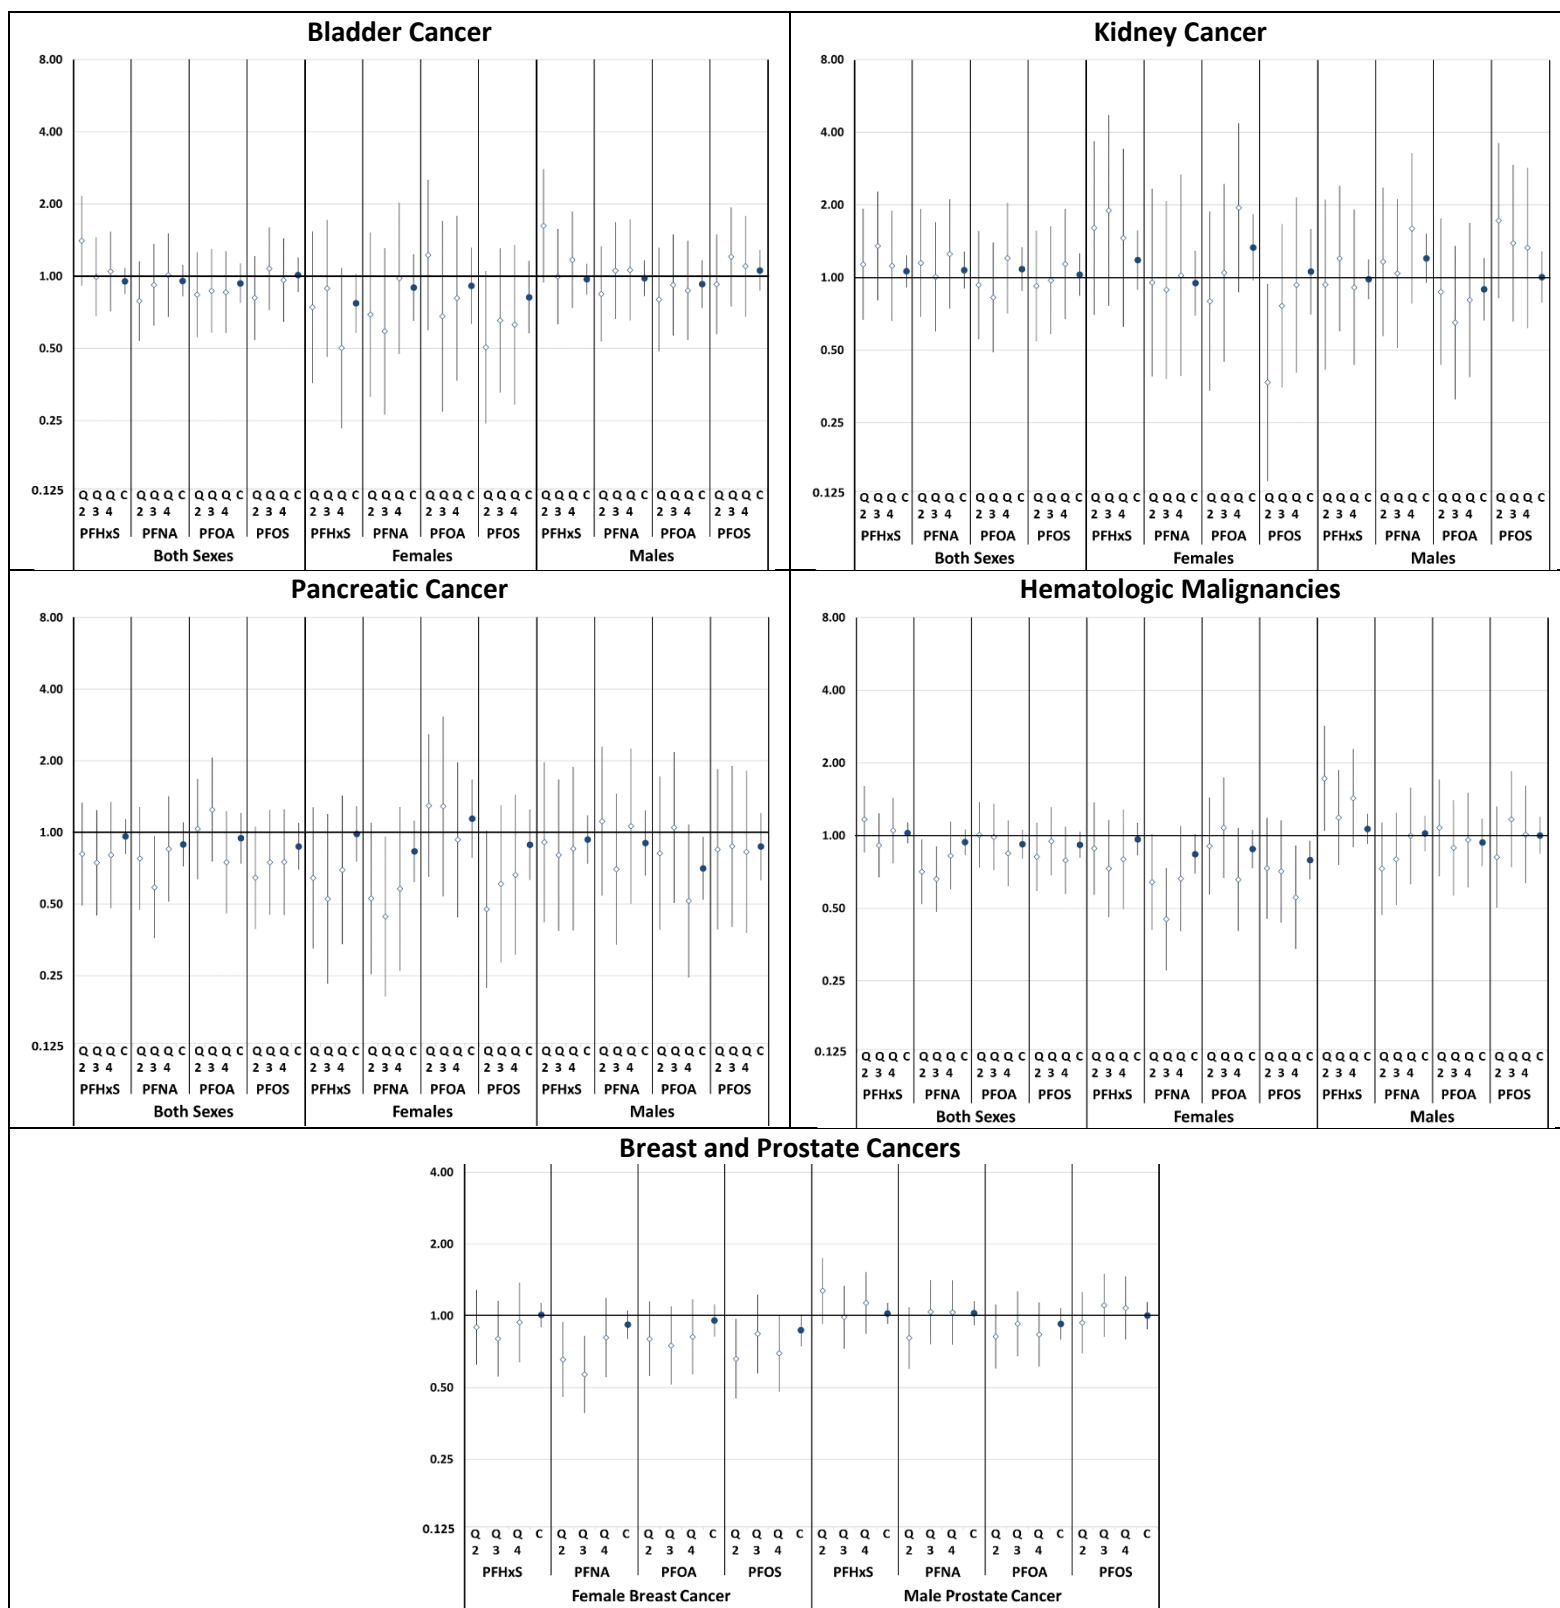

Figure S4. Hazard ratios and 95% confidence intervals from primary models for overall cancer site groups per doubling of PFAS concentrations (using log<sub>2</sub>-transformed measures) [solid circles] and for quartiles defined among cases relative to quartile 1 [open circles], Case-cohort study of association between PFAS and selected cancers among participants in the Cancer Prevention II LifeLink cohort, 1998-2015. All models had separate baseline hazards by sex or were restricted to one sex. Models controlled for year of serum sample collection, age at serum collection, race, education, smoking status, and alcohol consumption. Q2=quartile 2, Q3=quartile3, Q4=quartile 4, C=continuous log<sub>2</sub>-transformed measure, PFHxS=perfluorohexane sulfonic acid, PFNA=perfluorononanoic acid, PFOA=perfluorooctanoic acid, PFOS=perfluorooctane sulfonate. See Table S9 for numerical data.

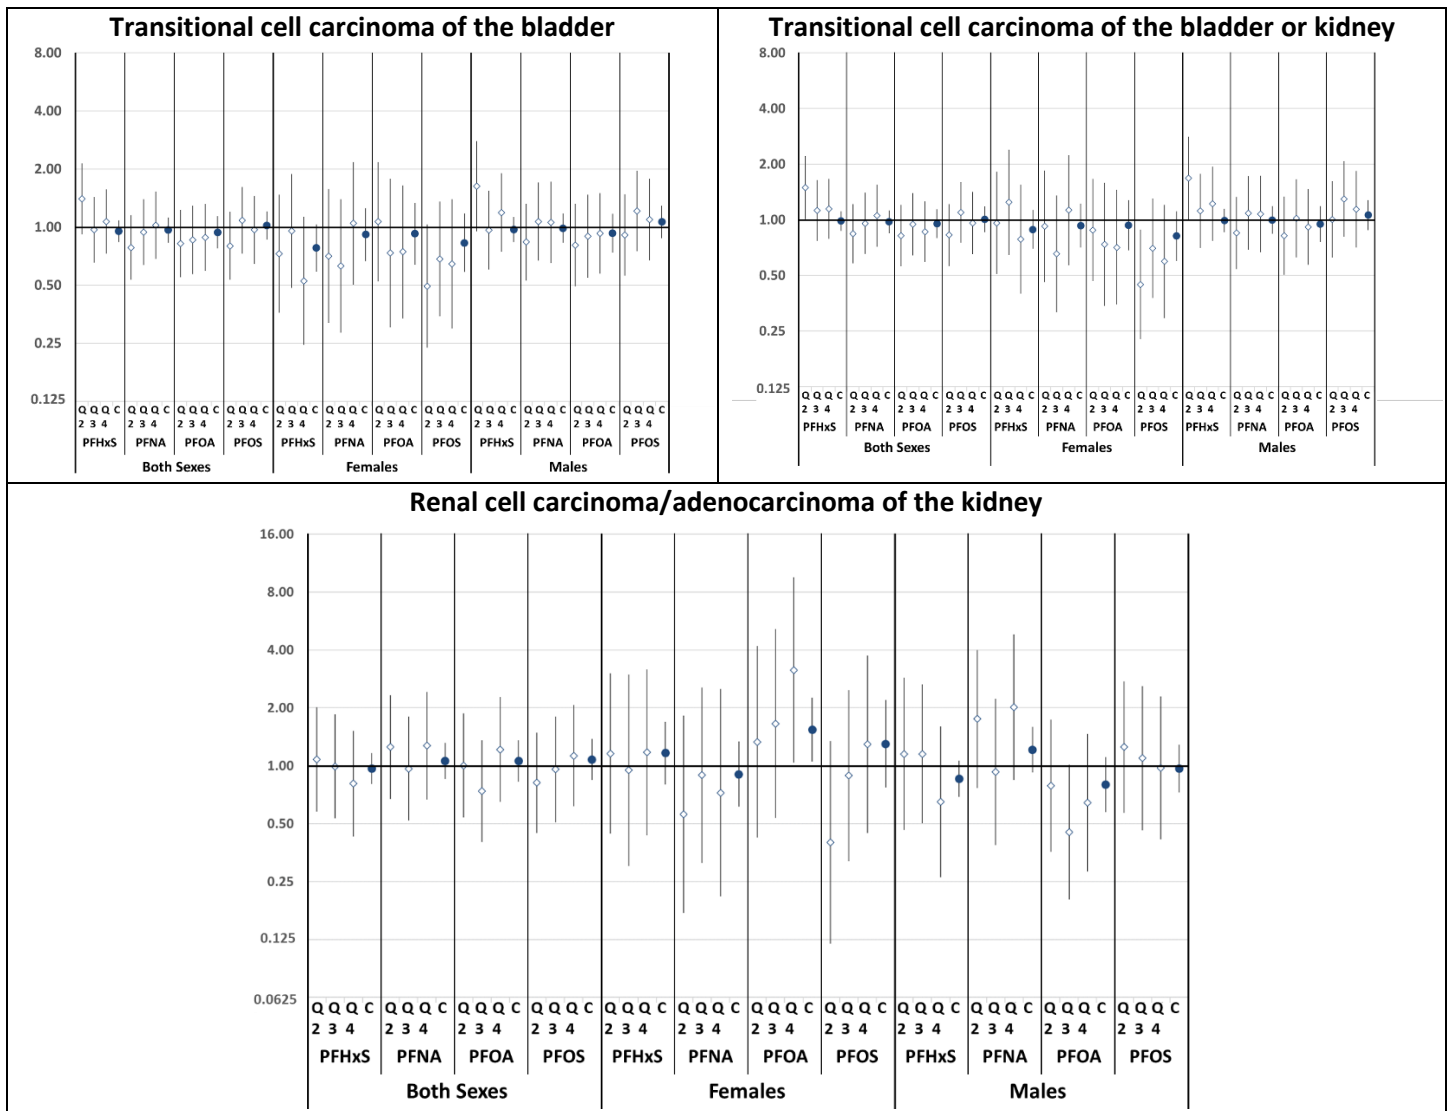

Figure S5. Hazard ratios and 95% confidence intervals from primary models for histologic sub-groups for bladder and kidney cancer per doubling of PFAS concentrations (using log<sub>2</sub>-transformed measures) [solid circles] and for quartiles defined among cases relative to quartile 1 [open circles], Case-cohort study of association between PFAS and selected cancers among participants in the Cancer Prevention II LifeLink cohort, 1998-2015. All models had separate baseline hazards by sex or were restricted to one sex. Models controlled for year of serum sample collection, age at serum collection, race, education, smoking status, and alcohol consumption. Q2=quartile 2, Q3=quartile3, Q4=quartile 4, C=continuous log<sub>2</sub>-transformed measure, PFHxS=perfluorohexane sulfonic acid, PFNA=perfluorononanoic acid, PFOA=perfluorooctanoic acid, PFOS=perfluorooctane sulfonate. See Table S10 for numerical data.



### Both Sexes

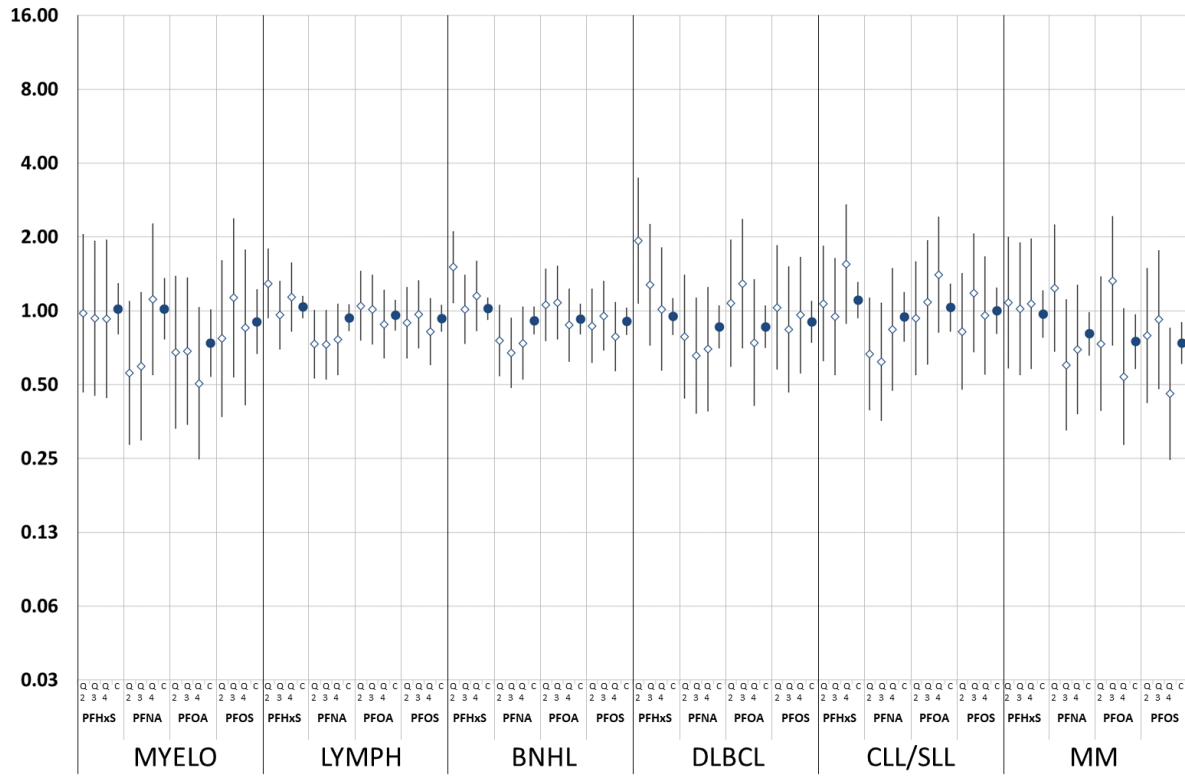

### Females

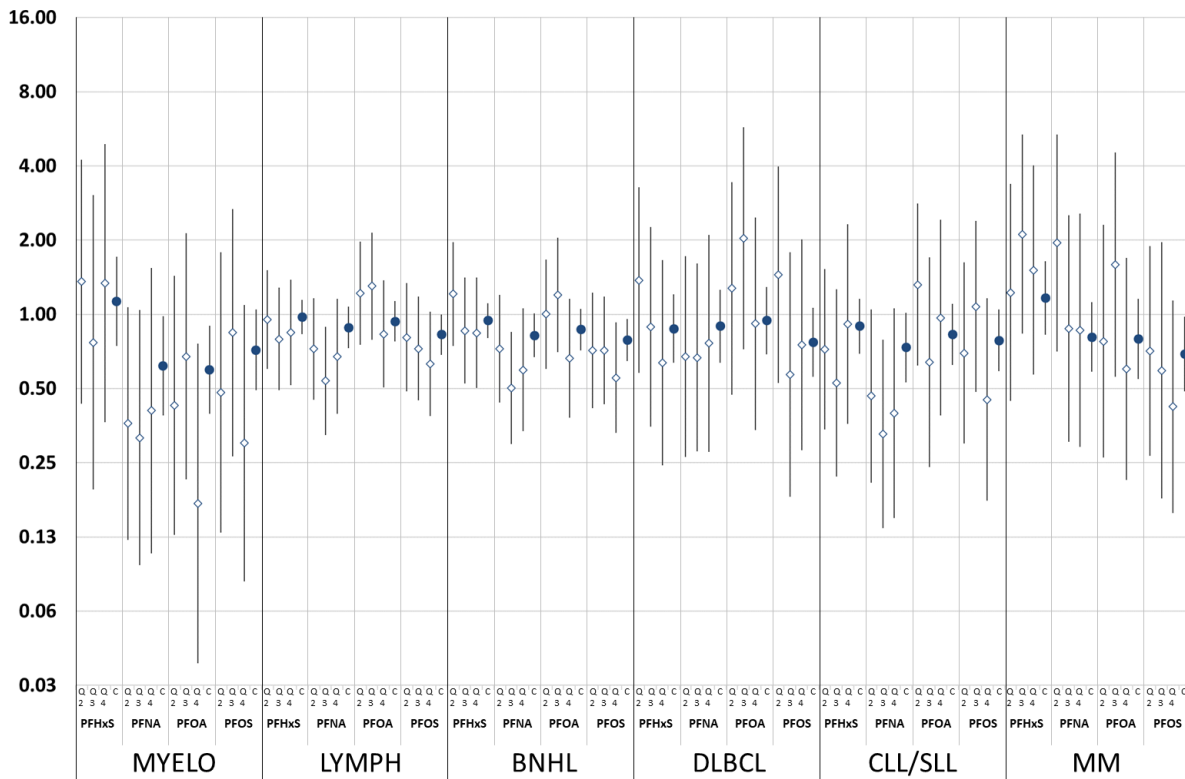

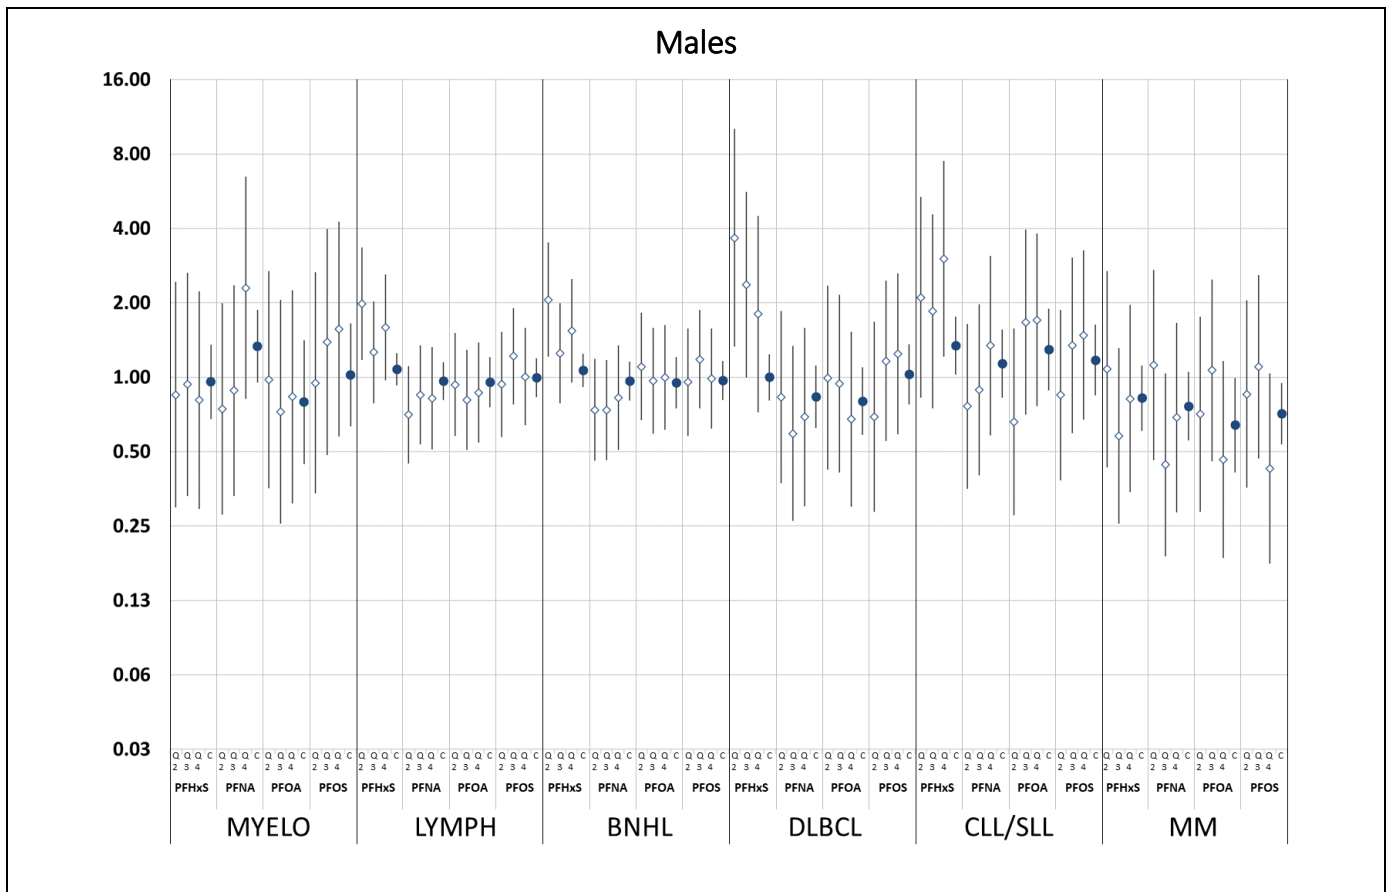

Figure S6. Hazard ratios and 95% confidence intervals from primary models for histologic sub-groups for hematologic malignancies per doubling of PFAS concentrations (using log<sub>2</sub>-transformed measures) [solid circles] and for quartiles defined among cases relative to quartile 1 [open circles], Case-cohort study of association between PFAS and selected cancers among participants in the Cancer Prevention II LifeLink cohort, 1998-2015. All models had separate baseline hazards by sex or were restricted to one sex. Models controlled for year of serum sample collection, age at serum collection, race, education, smoking status, and alcohol consumption. Q2=quartile 2, Q3=quartile3, Q4=quartile 4, C=continuous log<sub>2</sub>-transformed measure, PFHxS=perfluorohexane sulfonic acid, PFNA=perfluorononanoic acid, PFOA=perfluorooctanoic acid, PFOS=perfluorooctane sulfonate, MYELO=myeloid malignancies, LYMPH=lymphoid malignancies, BNHL=B-cell non-Hodgkin leukemia/lymphoma, DLBCL=diffuse large B-cell lymphoma, CLL/SLL=chronic lymphocytic leukemia/small lymphocytic lymphoma/mantle cell lymphoma, MM=multiple myeloma. See Table S10 for numerical data.
